# Supplementary material for: Antiapoptosis and Antifibrosis Effects of Qishen Granules on Heart Failure Rats via Hippo Pathway
Source: Biomed Res Int. 2019 Dec 12;2019:1642575. doi: 10.1155/2019/1642575 (PMC6930732; doi:10.1155/2019/1642575)
Supplement: Supplementary Materials — Table S1: the upregulated differentially expressed genes between model and sham groups. Table S2: the downregulated differentially expressed genes between model and sham groups. Table S3: the upregulated differentially expressed genes between QSG and model groups. Table S4: the downregulated differentially expressed genes between QSG and model groups. [file 1642575.f1.zip]

Archive with 4 entries (4 files):
- 1642575.f1/Tables S1.xls
- 1642575.f1/Tables S2.xls
- 1642575.f1/Tables S3.xls
- 1642575.f1/Tables S4.xls
