# Supplementary material for: Antiapoptosis and Antifibrosis Effects of Qishen Granules on Heart Failure Rats via Hippo Pathway
Source: Biomed Res Int. 2019 Dec 12;2019:1642575. doi: 10.1155/2019/1642575 (PMC6930732; doi:10.1155/2019/1642575)
Supplement: Supplementary Materials — Table S1: the upregulated differentially expressed genes between model and sham groups. Table S2: the downregulated differentially expressed genes between model and sham groups. Table S3: the upregulated differentially expressed genes between QSG and model groups. Table S4: the downregulated differentially expressed genes between QSG and model groups. [file 1642575.f1.zip › 1642575.f1/Tables S1.xls]

## Sheet: Tables S1
Table 1 The up-regulated differentially expressed genes between model and sham groups
Ensembl.ID	Sham.Expression	Model.Expression	TMM.normalized.Sham.expression	TMM.normalized.Model.expression	FDR	Fold.Change
ENSRNOG00000058560	5.67	1047	5.68	1036.7	4.09e-09	182.45
ENSRNOG00000002158	1.33	66.67	1.37	69.13	0.000456	50.46
ENSRNOG00000012920	0.67	41.67	0.92	40.53	0.0199	44.05
ENSRNOG00000014118	1.33	46	1.61	47.35	0.0397	29.42
ENSRNOG00000018570	1.67	20	1.61	23.37	0.023	14.48
ENSRNOG00000023148	13	158	11.64	166.59	0.0137	14.31
ENSRNOG00000008176	6087.67	58217.3	5947.31	63889.5	5.31e-07	10.74
ENSRNOG00000008947	11.67	68.33	11.11	84.13	0.0347	7.57
ENSRNOG00000007810	3.67	22.33	3.55	26.51	0.0421	7.47
ENSRNOG00000015518	1.67	11.67	1.91	13.15	0.0373	6.89
ENSRNOG00000032002	12	76.33	11.57	75.79	0.0434	6.55
ENSRNOG00000013262	33	192	33.24	213.42	0.0104	6.42
ENSRNOG00000017659	4.33	23.33	4.23	26.41	0.0347	6.25
ENSRNOG00000005787	2	12	1.95	11.74	0.0443	6.02
ENSRNOG00000030666	2.67	14.33	2.45	14.05	0.0491	5.73
ENSRNOG00000031469	1.67	7.67	1.65	9.42	0.0472	5.7
ENSRNOG00000005109	2.33	9.67	2.22	12.03	0.045	5.41
ENSRNOG00000013840	8	37.67	7.68	39.83	0.0114	5.18
ENSRNOG00000029871	1.67	8.67	1.72	8.68	0.0463	5.04
ENSRNOG00000020622	11.67	50	11.56	57.71	0.0405	4.99
ENSRNOG00000011483	54.33	238.33	51.87	248.64	0.0268	4.79
ENSRNOG00000019607	1.67	9	1.91	9.07	0.0404	4.75
ENSRNOG00000029911	61.33	252.33	58.51	266.03	0.0204	4.55
ENSRNOG00000021217	6.33	24	5.74	25.14	0.0422	4.38
ENSRNOG00000016606	4.67	20	4.49	19.66	0.0481	4.38
ENSRNOG00000025151	9	35.33	8.71	38.01	0.0348	4.36
ENSRNOG00000011557	38	156	36.23	156.39	0.0451	4.32
ENSRNOG00000016957	6.33	20.33	6.05	25.17	0.0375	4.16
ENSRNOG00000030285	26.33	110	25.72	106.45	0.0412	4.14
ENSRNOG00000032417	4	15	3.71	14.95	0.0432	4.03
ENSRNOG00000033444	6	20.33	5.55	22.32	0.0372	4.02
ENSRNOG00000005998	10.33	34.33	9.94	39.08	0.0477	3.93
ENSRNOG00000019138	36	114.67	33.68	131.21	0.038	3.9
ENSRNOG00000014269	4	14.33	3.79	14.51	0.049	3.83
ENSRNOG00000021619	4	11.33	3.75	14.35	0.038	3.82
ENSRNOG00000002053	31.67	91.67	29.6	112.59	0.0464	3.8
ENSRNOG00000056947	22.67	77	21.05	78.33	0.0405	3.72
ENSRNOG00000025498	9.67	26.33	9.19	33.4	0.0379	3.63
ENSRNOG00000008697	96	277.33	91.36	327.74	0.0347	3.59
ENSRNOG00000029598	7.67	23.67	7.14	25.43	0.0483	3.56
ENSRNOG00000048363	19	65	18.93	67.25	0.0459	3.55
ENSRNOG00000001984	18.33	59	17.62	62.07	0.0383	3.52
ENSRNOG00000011824	37.67	116.67	34.03	119.33	0.0412	3.51
ENSRNOG00000026060	8.67	24.33	7.95	27.77	0.0471	3.49
ENSRNOG00000010663	3.67	10	3.52	12.26	0.037	3.49
ENSRNOG00000058103	3.67	10.33	3.55	12.27	0.0384	3.45
ENSRNOG00000023576	15.67	47.67	15.01	51.8	0.0417	3.45
ENSRNOG00000019780	23.67	73.33	22.89	75.9	0.0445	3.32
ENSRNOG00000022839	279	883.67	268.6	888.52	0.0176	3.31
ENSRNOG00000013552	12.67	32	12.18	39.62	0.0379	3.25
ENSRNOG00000009736	4.67	14.67	4.6	14.95	0.036	3.25
ENSRNOG00000018557	16.33	50.33	15.42	50.09	0.0412	3.25
ENSRNOG00000060179	54.33	140	53.36	172.02	0.0412	3.22
ENSRNOG00000048088	13.33	36.67	12.83	41.36	0.0471	3.22
ENSRNOG00000054592	7.33	21.67	6.98	22.41	0.0396	3.21
ENSRNOG00000022391	7	21.33	6.57	20.91	0.0479	3.18
ENSRNOG00000009425	16.33	51.33	15.68	49.51	0.0482	3.16
ENSRNOG00000051780	7.67	20.33	7.38	23.29	0.0475	3.16
ENSRNOG00000027736	21.33	56	20.19	63.64	0.0469	3.15
ENSRNOG00000000443	558.33	1357.67	525.29	1637.6	0.0444	3.12
ENSRNOG00000057645	12	32	11.17	34.75	0.0441	3.11
ENSRNOG00000023969	474	1422.67	455.66	1413.4	0.0204	3.1
ENSRNOG00000031202	6.33	18.67	5.84	18.04	0.042	3.09
ENSRNOG00000037198	423.33	1213.67	406.77	1255.52	2.74e-06	3.09
ENSRNOG00000014021	9	26.33	9.22	28.29	0.0471	3.07
ENSRNOG00000006553	10	25.33	9.42	28.63	0.0441	3.04
ENSRNOG00000029658	946.33	2685.33	895.95	2720.75	2.33e-15	3.04
ENSRNOG00000010634	5.67	15.33	5.63	17.04	0.0397	3.02
ENSRNOG00000036603	67.33	187.33	65.55	198.06	0.0412	3.02
ENSRNOG00000042990	18.67	51.33	17.29	51.66	0.0462	2.99
ENSRNOG00000017773	8.67	24	8.14	24.33	0.0418	2.99
ENSRNOG00000009907	5	13.67	4.8	14.28	0.0397	2.97
ENSRNOG00000016164	11.33	29	10.7	31.61	0.0428	2.95
ENSRNOG00000053766	15	34.33	13.83	40.8	0.038	2.95
ENSRNOG00000019163	8.67	24.33	8.39	24.65	0.0455	2.94
ENSRNOG00000020687	5	12.33	4.79	14.06	0.0456	2.94
ENSRNOG00000014385	22	52	21.33	62.61	0.0383	2.94
ENSRNOG00000027742	128	337.33	123.31	360.83	0.0106	2.93
ENSRNOG00000001976	45	129	43.81	127.01	0.0449	2.9
ENSRNOG00000028768	88.67	256	87.59	253.72	0.049	2.9
ENSRNOG00000021555	9.67	26.67	9.38	27.11	0.0407	2.89
ENSRNOG00000029401	32.67	76	30.46	88.07	0.039	2.89
ENSRNOG00000011502	18	49.67	16.95	48.95	0.0401	2.89
ENSRNOG00000046834	201	426.33	180.97	519.03	0.0444	2.87
ENSRNOG00000034258	6809.33	17636.7	6419.92	18212.8	0.00727	2.84
ENSRNOG00000003304	32.33	86.67	30.46	85.88	0.0445	2.82
ENSRNOG00000006721	7.67	18.67	7.28	20.16	0.0492	2.77
ENSRNOG00000015036	1232.67	3112.33	1187.59	3280.59	3.7e-08	2.76
ENSRNOG00000020519	11.33	26.33	10.59	29.13	0.0445	2.75
ENSRNOG00000010880	16.67	41.67	17.58	48.04	0.0376	2.73
ENSRNOG00000007917	8.67	22.33	8.27	22.57	0.0433	2.73
ENSRNOG00000043219	6	14	5.81	15.85	0.0407	2.73
ENSRNOG00000003950	9.33	21.67	8.91	24.21	0.0398	2.72
ENSRNOG00000015682	9	20.33	8.12	22.03	0.038	2.71
ENSRNOG00000000638	27	68	25.83	69.76	0.0385	2.7
ENSRNOG00000030920	9.33	20	8.96	24.18	0.0332	2.7
ENSRNOG00000033893	180.67	439	173.47	467.29	0.0483	2.69
ENSRNOG00000060329	7.33	17.33	6.99	18.73	0.0416	2.68
ENSRNOG00000003217	1361.33	3274.33	1301.99	3477.54	0.000141	2.67
ENSRNOG00000031890	524	1331.33	505.94	1350.79	0.0228	2.67
ENSRNOG00000017414	1658	4133.67	1622.26	4324.37	9.64e-13	2.67
ENSRNOG00000038286	6	15	5.66	15.09	0.0444	2.66
ENSRNOG00000060629	5	11.33	4.95	13.07	0.0349	2.64
ENSRNOG00000024208	5	10.33	4.75	12.48	0.0373	2.63
ENSRNOG00000018290	17	46	17.35	45.51	0.0387	2.62
ENSRNOG00000016374	13.67	31.67	13.44	35.24	0.0404	2.62
ENSRNOG00000047817	9.67	22.67	9.06	23.74	0.0449	2.62
ENSRNOG00000053377	4.67	10.33	4.57	11.94	0.038	2.61
ENSRNOG00000037080	9	19.33	8.77	22.68	0.036	2.59
ENSRNOG00000011094	485	1262.67	486.65	1257.18	0.0137	2.58
ENSRNOG00000016151	735.33	1734.67	710.44	1831.4	0.021	2.58
ENSRNOG00000053891	117.67	296	113.63	292.86	0.0364	2.58
ENSRNOG00000027869	13.67	29.67	12.58	32.33	0.0399	2.57
ENSRNOG00000011313	7.67	17	7.39	18.74	0.0417	2.53
ENSRNOG00000038955	27.67	65.67	26.51	67.11	0.0477	2.53
ENSRNOG00000018644	12.67	29.67	12.48	31.48	0.0491	2.52
ENSRNOG00000042322	10.33	23	10.07	25.31	0.0366	2.51
ENSRNOG00000012892	17	35.67	15.75	39.53	0.0383	2.51
ENSRNOG00000025231	12.33	25.67	11.41	28.56	0.0402	2.5
ENSRNOG00000054474	8.67	19	8.08	20.21	0.0395	2.5
ENSRNOG00000024237	9.67	20	9.55	23.76	0.0368	2.49
ENSRNOG00000010210	4.67	10.67	4.46	11.09	0.0371	2.48
ENSRNOG00000052572	7.67	16.67	7.48	18.58	0.0403	2.48
ENSRNOG00000024712	5.67	12.33	5.57	13.73	0.0395	2.47
ENSRNOG00000005278	7.67	16.67	7.47	18.39	0.0385	2.46
ENSRNOG00000013166	28.67	55	26.72	65.76	0.0336	2.46
ENSRNOG00000058193	6	12	5.44	13.35	0.0333	2.45
ENSRNOG00000023536	68.33	133	64	156.7	0.0403	2.45
ENSRNOG00000014107	4.67	9.33	4.45	10.79	0.0367	2.43
ENSRNOG00000039560	10.67	23.33	10.02	24.26	0.0476	2.42
ENSRNOG00000014293	27	53.67	25.77	62.18	0.0362	2.41
ENSRNOG00000038960	17	37.33	15.87	38.26	0.0438	2.41
ENSRNOG00000002524	13.33	30	12.99	31.22	0.0473	2.4
ENSRNOG00000055751	61.33	132.67	57.87	138.98	0.049	2.4
ENSRNOG00000007765	51.67	109	48.31	115.94	0.0404	2.4
ENSRNOG00000011885	12.67	25.33	11.99	28.76	0.0362	2.4
ENSRNOG00000061264	14.67	30	14.24	34.11	0.0397	2.4
ENSRNOG00000001324	9.67	18	8.87	21.25	0.0362	2.4
ENSRNOG00000005659	13.33	30	12.29	29.4	0.0368	2.39
ENSRNOG00000022256	41.67	94	40.41	96.28	0.0412	2.38
ENSRNOG00000013615	8.67	21.67	9.07	21.55	0.0344	2.38
ENSRNOG00000014231	4.33	8.33	4.36	10.27	0.0458	2.36
ENSRNOG00000025587	38	70.67	35.51	83.61	0.033	2.35
ENSRNOG00000003806	7.67	15	6.93	16.3	0.0343	2.35
ENSRNOG00000036911	17.67	36.33	16.25	38.2	0.0417	2.35
ENSRNOG00000018674	9.33	19.67	8.79	20.63	0.038	2.35
ENSRNOG00000020644	7.33	16.33	7.42	17.37	0.0379	2.34
ENSRNOG00000013330	11	23.67	10.49	24.46	0.042	2.33
ENSRNOG00000011316	43.33	93.67	40.88	95.25	0.0406	2.33
ENSRNOG00000029501	18.67	38	17.72	41.06	0.0406	2.32
ENSRNOG00000009563	85	198	84.93	196.73	0.048	2.32
ENSRNOG00000011136	9	17.33	8.81	20.35	0.0373	2.31
ENSRNOG00000036959	18.67	41.67	17.72	40.89	0.0473	2.31
ENSRNOG00000001765	6.67	13	6.42	14.82	0.0335	2.31
ENSRNOG00000004498	8.67	17.67	7.97	18.32	0.0332	2.3
ENSRNOG00000029768	13	27.67	12.72	29.11	0.0414	2.29
ENSRNOG00000016538	54	101.67	49.55	113.41	0.0403	2.29
ENSRNOG00000005371	19.33	37.67	18.39	41.94	0.0343	2.28
ENSRNOG00000046280	19.67	42	19.39	44.09	0.0396	2.27
ENSRNOG00000013674	21.33	46	20.59	46.81	0.0408	2.27
ENSRNOG00000020165	12.67	25.67	12.53	28.47	0.0383	2.27
ENSRNOG00000032659	48.67	106	46.44	105.39	0.0487	2.27
ENSRNOG00000058329	16.67	30	15.24	34.56	0.0375	2.27
ENSRNOG00000004575	4	8.67	3.77	8.46	0.0375	2.25
ENSRNOG00000021015	125	263	121.45	272.75	0.0419	2.25
ENSRNOG00000019183	65	122.33	62.26	139.77	0.0385	2.24
ENSRNOG00000017550	8.67	16.67	7.97	17.85	0.0334	2.24
ENSRNOG00000002429	9	20	8.69	19.39	0.0365	2.23
ENSRNOG00000053728	10.67	20.33	10.11	22.56	0.0358	2.23
ENSRNOG00000050714	14.33	27	13.65	30.43	0.0364	2.23
ENSRNOG00000046081	11	21	10.43	23.24	0.0397	2.23
ENSRNOG00000007970	26	50.33	24.6	54.79	0.0472	2.23
ENSRNOG00000039976	67	122	64.2	142.99	0.0343	2.23
ENSRNOG00000058568	51.33	85.33	48	105.78	0.0356	2.2
ENSRNOG00000012531	10.67	19	10.12	22.27	0.0344	2.2
ENSRNOG00000005960	89.33	170	82.25	180.13	0.0446	2.19
ENSRNOG00000031834	37	63.67	36.11	78.8	0.0348	2.18
ENSRNOG00000004699	210	407	198.6	433.12	0.0415	2.18
ENSRNOG00000019161	27.67	54.33	26.62	57.95	0.0477	2.18
ENSRNOG00000032970	6.67	13.67	6.17	13.39	0.0374	2.17
ENSRNOG00000049282	122	248.33	114.94	249.26	0.0442	2.17
ENSRNOG00000001187	113	235.67	110.68	239.92	0.0443	2.17
ENSRNOG00000005465	11.67	22.67	10.82	23.29	0.038	2.15
ENSRNOG00000009204	25.33	42.67	24.11	51.82	0.035	2.15
ENSRNOG00000005621	35.33	64.67	33.11	71.12	0.0387	2.15
ENSRNOG00000014486	16	29.67	15.05	32.3	0.038	2.15
ENSRNOG00000001830	8.67	16	8.08	17.34	0.0358	2.15
ENSRNOG00000017428	649.67	1219.67	610.91	1300.99	0.0135	2.13
ENSRNOG00000054764	24.67	41.67	23.51	49.87	0.0347	2.12
ENSRNOG00000011585	24.67	44.67	23.11	48.91	0.0385	2.12
ENSRNOG00000057204	7	13.33	6.9	14.6	0.0382	2.12
ENSRNOG00000009436	13.67	26.33	13.08	27.65	0.038	2.11
ENSRNOG00000004378	45.67	86.67	42.5	89.8	0.0474	2.11
ENSRNOG00000014534	8	16.33	7.7	16.27	0.0417	2.11
ENSRNOG00000013290	17.67	32.33	16.59	35.01	0.0391	2.11
ENSRNOG00000006314	34.67	67.67	33.05	69.57	0.0399	2.11
ENSRNOG00000036673	11.33	19.67	10.04	21.11	0.036	2.1
ENSRNOG00000004458	27.33	49.67	25.53	53.58	0.0383	2.1
ENSRNOG00000030467	152	291.33	147.19	307.57	0.0377	2.09
ENSRNOG00000015159	12.67	24	11.67	24.37	0.0351	2.09
ENSRNOG00000002917	9.33	18.67	9.77	20.39	0.0365	2.09
ENSRNOG00000031287	6.67	11	6.17	12.82	0.0359	2.08
ENSRNOG00000019942	8.33	16	8.09	16.78	0.0383	2.07
ENSRNOG00000021962	87.67	155.67	85.3	176.57	0.0383	2.07
ENSRNOG00000015972	169.67	317.67	157.26	324.97	0.0476	2.07
ENSRNOG00000021669	24.67	44.67	22.92	47.18	0.0401	2.06
ENSRNOG00000012655	45	81.33	41.34	85.02	0.0397	2.06
ENSRNOG00000009465	118.67	201.33	108.7	223.45	0.0405	2.06
ENSRNOG00000032240	283.67	559.67	276.24	567.86	0.037	2.06
ENSRNOG00000061366	25.33	46	23.42	48.09	0.0407	2.05
ENSRNOG00000013907	16.33	31.33	16	32.7	0.0361	2.04
ENSRNOG00000012460	22	42.33	21.22	43.35	0.0417	2.04
ENSRNOG00000015421	42.67	75	40.48	82.43	0.0387	2.04
ENSRNOG00000019477	19	34.67	17.83	36.25	0.0366	2.03
ENSRNOG00000037645	188.33	359	186.73	379.63	0.0485	2.03
ENSRNOG00000001030	2925	5428.33	2835.31	5754.48	0.0354	2.03
ENSRNOG00000036865	6.67	13.33	6.37	12.92	0.0363	2.03
ENSRNOG00000019472	54.33	102.33	51.26	103.86	0.0477	2.03
ENSRNOG00000018003	72.67	131.67	69.18	140.13	0.0441	2.03
ENSRNOG00000002848	3673.67	6486.33	3465.92	7010.6	0.0131	2.02
ENSRNOG00000022260	20.33	37	19.11	38.61	0.0477	2.02
ENSRNOG00000006783	32	55	30.5	61.3	0.0378	2.01
ENSRNOG00000016701	31	54.67	29.7	59.6	0.0399	2.01
ENSRNOG00000010999	98.67	182	92.43	185.32	0.0481	2
ENSRNOG00000006723	26.33	45.67	24.64	49.25	0.0373	2
ENSRNOG00000017676	122	190.33	110.41	220.22	0.0351	1.99
ENSRNOG00000037371	125.33	233.33	119.57	237.79	0.048	1.99
ENSRNOG00000057159	17.67	30.67	16.03	31.87	0.0375	1.99
ENSRNOG00000029047	7	11.33	6.41	12.74	0.0361	1.99
ENSRNOG00000047459	7.33	13	7.29	14.48	0.0367	1.99
ENSRNOG00000009334	8	13.67	7.56	15.01	0.0362	1.99
ENSRNOG00000019718	77	142	72.55	143.73	0.0473	1.98
ENSRNOG00000011789	182.67	309.33	173.5	343.72	0.0441	1.98
ENSRNOG00000007377	200.67	326	186.69	369.84	0.0416	1.98
ENSRNOG00000049766	246.33	473.33	239.19	472.35	0.0398	1.97
ENSRNOG00000000156	23.67	39	23.13	45.66	0.0349	1.97
ENSRNOG00000008098	14	24.67	13.83	27.29	0.0333	1.97
ENSRNOG00000028627	209.67	364.67	196.19	386.88	0.0414	1.97
ENSRNOG00000025881	49.67	87.33	47.81	94.24	0.0466	1.97
ENSRNOG00000017157	20.67	37	19.22	37.88	0.0365	1.97
ENSRNOG00000048878	6.67	11	6.34	12.48	0.0364	1.97
ENSRNOG00000061442	106.33	191.33	99.79	196	0.0441	1.96
ENSRNOG00000015365	160.67	297.67	152.8	300.04	0.0352	1.96
ENSRNOG00000051570	18.33	32.67	16.81	33	0.0375	1.96
ENSRNOG00000050040	14.33	25.67	13.58	26.63	0.0421	1.96
ENSRNOG00000009329	439.67	824.67	418.62	819.47	0.0486	1.96
ENSRNOG00000027299	11	18.67	10.37	20.18	0.0369	1.95
ENSRNOG00000018247	149.67	276	143.1	278.3	0.0451	1.94
ENSRNOG00000028259	10.33	17.33	9.83	19.09	0.0344	1.94
ENSRNOG00000003732	58	89.33	53.11	102.87	0.0362	1.94
ENSRNOG00000028274	119.33	184.67	114.39	221.25	0.0375	1.93
ENSRNOG00000007690	260.67	490	253.52	489.98	0.0347	1.93
ENSRNOG00000018517	271.33	486	256.15	494.53	0.038	1.93
ENSRNOG00000000543	26	43	23.93	46.18	0.0371	1.93
ENSRNOG00000053537	15	27.67	14.28	27.52	0.0376	1.93
ENSRNOG00000027550	39.33	70.33	37.34	71.94	0.0401	1.93
ENSRNOG00000024345	197.33	338.67	186.41	359.15	0.0348	1.93
ENSRNOG00000055293	1635	2884.33	1530.36	2941.11	0.0168	1.92
ENSRNOG00000013744	400	695.67	384.17	737.59	0.0485	1.92
ENSRNOG00000013481	286.67	473.33	271.67	521.49	0.0415	1.92
ENSRNOG00000058094	113.67	192	104.62	200.81	0.0395	1.92
ENSRNOG00000019368	9.33	16.33	8.78	16.83	0.0381	1.92
ENSRNOG00000011644	51	87	49.68	95.26	0.0386	1.92
ENSRNOG00000022426	13.33	21.67	12.44	23.83	0.0374	1.92
ENSRNOG00000006324	14.67	25	13.61	26.05	0.0352	1.91
ENSRNOG00000037951	48	81	44.83	85.8	0.0407	1.91
ENSRNOG00000011427	71.67	124.67	69.37	132.68	0.0453	1.91
ENSRNOG00000021704	9	16.67	8.67	16.58	0.04	1.91
ENSRNOG00000001766	200.33	357.33	191.6	366.13	0.0443	1.91
ENSRNOG00000030759	22.67	38.67	21.06	40.24	0.038	1.91
ENSRNOG00000008678	131	215.33	122.6	234.2	0.0394	1.91
ENSRNOG00000021663	20.33	32	18.4	35.13	0.0361	1.91
ENSRNOG00000002345	25	42.33	23.46	44.77	0.038	1.91
ENSRNOG00000024998	66.33	107.67	61.19	116.7	0.0372	1.91
ENSRNOG00000028814	445	834.33	430.08	820.01	0.0447	1.91
ENSRNOG00000059491	32.67	55.67	30.22	57.6	0.036	1.91
ENSRNOG00000050675	138.33	226.33	136.56	260.24	0.033	1.91
ENSRNOG00000019207	34.33	58	33.37	63.58	0.0363	1.91
ENSRNOG00000017052	15.33	24.33	14.73	28.02	0.0359	1.9
ENSRNOG00000001724	48	81	45.47	86.43	0.0417	1.9
ENSRNOG00000001804	256	430	243.06	460.96	0.049	1.9
ENSRNOG00000014070	5	7.67	4.95	9.39	0.0467	1.9
ENSRNOG00000039931	85.67	126.67	82.3	155.83	0.0359	1.89
ENSRNOG00000020875	7.33	12	7.13	13.5	0.0358	1.89
ENSRNOG00000008632	26	44.67	24.43	46.21	0.0383	1.89
ENSRNOG00000031081	693.33	1240	665.81	1258.35	0.0134	1.89
ENSRNOG00000055567	78	129.33	72.5	136.95	0.0383	1.89
ENSRNOG00000000277	37.33	62.33	35.2	66.48	0.0397	1.89
ENSRNOG00000011671	13.33	22.67	12.55	23.68	0.0336	1.89
ENSRNOG00000019542	111	197.33	107.35	202.4	0.0476	1.89
ENSRNOG00000007338	845	1452.67	817.66	1539.38	0.0168	1.88
ENSRNOG00000003189	37.33	63.33	37.93	71.37	0.0343	1.88
ENSRNOG00000001287	13	22.33	12.35	23.23	0.0469	1.88
ENSRNOG00000058555	34.33	59.33	32.9	61.79	0.0414	1.88
ENSRNOG00000023337	17.67	29	16.02	30.07	0.0354	1.88
ENSRNOG00000008196	154.33	272	148.59	278.88	0.0414	1.88
ENSRNOG00000002751	21	34.67	19.41	36.37	0.0376	1.87
ENSRNOG00000016852	13.33	23.67	12.93	24.16	0.0381	1.87
ENSRNOG00000002434	161.33	266.67	151.16	282.22	0.0477	1.87
ENSRNOG00000017130	9.67	17	9.75	18.18	0.036	1.86
ENSRNOG00000045560	134	234.33	125.2	233.09	0.0383	1.86
ENSRNOG00000060574	10	18	9.76	18.17	0.038	1.86
ENSRNOG00000014079	1927.33	3298	1840.22	3422.91	4.44e-16	1.86
ENSRNOG00000057826	27	43	25.58	47.57	0.0372	1.86
ENSRNOG00000057099	6.33	12	6.23	11.58	0.0362	1.86
ENSRNOG00000001469	2058.33	3205.67	1967.87	3656.94	0.0472	1.86
ENSRNOG00000060572	41.33	68.67	39.09	72.64	0.0413	1.86
ENSRNOG00000025937	58.33	97.33	55.07	102.29	0.0474	1.86
ENSRNOG00000013917	218.33	349	199.21	369.72	0.0383	1.86
ENSRNOG00000025970	20.33	33	18.88	35.05	0.034	1.86
ENSRNOG00000012030	10.33	16.67	9.75	18.09	0.0344	1.86
ENSRNOG00000057221	57	100.67	54.86	101.5	0.0387	1.85
ENSRNOG00000011039	48	83	45.48	84.09	0.0409	1.85
ENSRNOG00000015410	31.67	49	29.37	54.29	0.0367	1.85
ENSRNOG00000013925	52.67	87	49.17	90.69	0.0404	1.84
ENSRNOG00000000142	155.67	254.67	146.64	270.11	0.048	1.84
ENSRNOG00000002946	67	107	63.03	116.06	0.0382	1.84
ENSRNOG00000016708	27	44.33	25.86	47.54	0.0389	1.84
ENSRNOG00000012802	87.67	141.67	82.94	152.44	0.0387	1.84
ENSRNOG00000019965	134	227.67	128.89	236.75	0.0423	1.84
ENSRNOG00000009899	134.67	218	124.79	229.15	0.0394	1.84
ENSRNOG00000022309	55	90	52.12	95.5	0.0424	1.83
ENSRNOG00000047098	8.67	13.67	8.46	15.49	0.0389	1.83
ENSRNOG00000009949	101.67	167.33	96.14	175.93	0.0476	1.83
ENSRNOG00000005574	14.67	24	13.99	25.6	0.0376	1.83
ENSRNOG00000004917	266.67	443.67	249.45	455.37	0.0488	1.83
ENSRNOG00000009106	109.33	189.67	107.35	195.94	0.041	1.83
ENSRNOG00000050485	382.67	612.33	368.27	670.69	0.0407	1.82
ENSRNOG00000038784	39.33	57.33	35.1	63.93	0.0387	1.82
ENSRNOG00000049629	11.33	17.33	10.81	19.68	0.0359	1.82
ENSRNOG00000019627	78.67	132.67	75.99	138.25	0.0408	1.82
ENSRNOG00000026914	12	19.67	11.44	20.81	0.0418	1.82
ENSRNOG00000048222	171.67	292.33	163.07	296.56	0.0407	1.82
ENSRNOG00000016203	9.67	15.33	9.54	17.34	0.0361	1.82
ENSRNOG00000003388	18.67	29.67	17.42	31.62	0.0372	1.81
ENSRNOG00000053915	14.33	24.67	13.8	25.03	0.0395	1.81
ENSRNOG00000008680	499.33	765.33	473.57	858.28	0.0467	1.81
ENSRNOG00000036980	13	21	11.92	21.6	0.0364	1.81
ENSRNOG00000033658	9.67	15.67	8.79	15.91	0.0363	1.81
ENSRNOG00000047967	11.33	16.33	10.82	19.57	0.0465	1.81
ENSRNOG00000047746	241.67	369.33	234.2	423.69	0.038	1.81
ENSRNOG00000001627	238	374.33	223.02	403.19	0.0469	1.81
ENSRNOG00000059113	26	41.33	24.13	43.62	0.033	1.81
ENSRNOG00000054360	37	59.33	35.33	63.63	0.0336	1.8
ENSRNOG00000009096	38	58.67	35.69	64.24	0.033	1.8
ENSRNOG00000011263	52.33	80.33	50.12	90.13	0.0355	1.8
ENSRNOG00000052256	104.67	161.67	101.71	182.86	0.034	1.8
ENSRNOG00000006112	21.67	34	19.67	35.36	0.0357	1.8
ENSRNOG00000061524	19	31	18.04	32.4	0.0377	1.8
ENSRNOG00000023943	2800	4504	2631.75	4720.81	0.0464	1.79
ENSRNOG00000060704	12	20.33	11.47	20.55	0.0341	1.79
ENSRNOG00000028545	237	364.67	221.86	397.2	0.0402	1.79
ENSRNOG00000010484	59	93.67	54.65	97.77	0.0359	1.79
ENSRNOG00000054458	10.67	18.33	10.42	18.64	0.0369	1.79
ENSRNOG00000020164	32	51.33	30.3	54.18	0.0356	1.79
ENSRNOG00000022242	133	224.67	127.22	227.4	0.0395	1.79
ENSRNOG00000014660	176.67	282.67	166.75	297.87	0.0476	1.79
ENSRNOG00000023214	14.67	21.67	13.44	24	0.0361	1.79
ENSRNOG00000054582	10.33	16	10.04	17.91	0.0349	1.78
ENSRNOG00000000552	21	36.33	20.37	36.34	0.036	1.78
ENSRNOG00000022637	1428.67	2075.67	1368.39	2441.24	0.0372	1.78
ENSRNOG00000048389	17	29	16.87	30.09	0.0358	1.78
ENSRNOG00000029449	35.33	56.33	33.74	60.17	0.0385	1.78
ENSRNOG00000007081	2249.33	3743.33	2135.45	3803.29	0.022	1.78
ENSRNOG00000029377	14	23.67	13.9	24.76	0.0341	1.78
ENSRNOG00000004180	14	23.67	13.28	23.62	0.0356	1.78
ENSRNOG00000056772	20.67	31.33	19.51	34.7	0.0361	1.78
ENSRNOG00000008373	87.67	150.33	85.3	151.59	0.0402	1.78
ENSRNOG00000057092	2224	3685	2077.73	3692.14	0.0459	1.78
ENSRNOG00000017783	182.33	285.67	175.3	311.34	0.044	1.78
ENSRNOG00000013148	8.33	12.67	7.98	14.17	0.0344	1.78
ENSRNOG00000049054	7.33	13	7.32	12.97	0.037	1.77
ENSRNOG00000032150	15.33	25	14.36	25.44	0.0353	1.77
ENSRNOG00000015426	28	43	26.59	47.11	0.033	1.77
ENSRNOG00000028335	178.67	273	167.37	296.48	0.0404	1.77
ENSRNOG00000013257	210	338.33	195.14	345.17	0.0471	1.77
ENSRNOG00000021839	13.33	21.67	12.7	22.46	0.0379	1.77
ENSRNOG00000021029	148.67	237.33	141.41	249.79	0.047	1.77
ENSRNOG00000009803	8	12.33	7.77	13.72	0.0478	1.77
ENSRNOG00000002276	21.67	34	20.11	35.51	0.0368	1.77
ENSRNOG00000057672	8.67	13	8.14	14.38	0.035	1.77
ENSRNOG00000008045	65	102.33	60.22	106.29	0.0349	1.76
ENSRNOG00000020193	19.33	29.33	17.92	31.55	0.0356	1.76
ENSRNOG00000055936	29	46	28.01	49.25	0.0393	1.76
ENSRNOG00000001930	164.67	261.67	153.83	270.07	0.046	1.76
ENSRNOG00000013729	9.33	15.67	9.22	16.17	0.0346	1.76
ENSRNOG00000054426	47.67	76.33	45.63	79.87	0.0446	1.75
ENSRNOG00000003882	271.33	420.33	253.02	442.6	0.0416	1.75
ENSRNOG00000013072	132.33	200.33	125.09	218.8	0.0383	1.75
ENSRNOG00000004810	72.33	113	67.18	117.48	0.0374	1.75
ENSRNOG00000003476	15.67	23.33	14.92	26.09	0.0348	1.75
ENSRNOG00000018830	52.67	85	51.29	89.63	0.0407	1.75
ENSRNOG00000009620	61.33	93.33	57.91	101.19	0.037	1.75
ENSRNOG00000057806	433.33	680.33	405.8	708.88	0.0422	1.75
ENSRNOG00000057927	57	95	55.11	96.21	0.0401	1.75
ENSRNOG00000025108	7.67	11.33	7.27	12.68	0.036	1.74
ENSRNOG00000008628	64.33	102	62.14	108.32	0.0391	1.74
ENSRNOG00000011654	12.33	19.33	11.34	19.77	0.0344	1.74
ENSRNOG00000010183	599	942	561.41	978.28	0.0481	1.74
ENSRNOG00000059207	29.33	46.33	27.87	48.56	0.0348	1.74
ENSRNOG00000015562	12.33	18.67	11.32	19.72	0.0361	1.74
ENSRNOG00000004783	26	40	24.14	42.03	0.0348	1.74
ENSRNOG00000055049	76.33	106.67	73.12	127.26	0.0361	1.74
ENSRNOG00000038905	12.67	19.67	12.23	21.27	0.0338	1.74
ENSRNOG00000025604	57.33	88	53.13	92.41	0.033	1.74
ENSRNOG00000014478	173.67	271.67	163.05	283.51	0.0472	1.74
ENSRNOG00000020344	93	145.67	90.22	156.83	0.0409	1.74
ENSRNOG00000023404	9.67	15.33	9.28	16.13	0.0331	1.74
ENSRNOG00000049349	49	80.33	48.4	84.1	0.0372	1.74
ENSRNOG00000020030	244	390	234.57	407.57	0.0356	1.74
ENSRNOG00000014089	80.67	121	74.68	129.76	0.0344	1.74
ENSRNOG00000019830	9.67	14.67	9.31	16.17	0.0366	1.74
ENSRNOG00000059326	84.33	129.67	79.37	137.78	0.0406	1.74
ENSRNOG00000025278	27	41.33	25.14	43.64	0.0352	1.74
ENSRNOG00000026951	19.67	30.67	18.45	32.01	0.0356	1.74
ENSRNOG00000011631	17	24.67	15.88	27.5	0.0359	1.73
ENSRNOG00000000547	32.33	51	30.46	52.73	0.038	1.73
ENSRNOG00000014613	312.33	478.33	297.13	514.09	0.0478	1.73
ENSRNOG00000039461	17	26.33	16.04	27.76	0.0343	1.73
ENSRNOG00000000699	413.33	651	396.15	683.71	0.0368	1.73
ENSRNOG00000032180	13.33	20.67	12.39	21.38	0.0375	1.73
ENSRNOG00000018441	10.33	16.67	9.84	16.98	0.0346	1.73
ENSRNOG00000020054	12	20	11.67	20.12	0.0365	1.72
ENSRNOG00000006569	90.67	135.67	84.93	146.34	0.0373	1.72
ENSRNOG00000018928	19.33	31	18.77	32.32	0.038	1.72
ENSRNOG00000006967	195.67	306.33	181.98	313.22	0.0407	1.72
ENSRNOG00000008415	86	130	82.16	141.38	0.038	1.72
ENSRNOG00000049695	10.33	16.33	9.75	16.77	0.0362	1.72
ENSRNOG00000040350	41.33	63.33	41.62	71.54	0.0359	1.72
ENSRNOG00000051158	118	165.33	109.53	188.21	0.0366	1.72
ENSRNOG00000051922	347	556.33	329.14	565.22	0.0474	1.72
ENSRNOG00000048567	11.67	19.67	11.61	19.93	0.0361	1.72
ENSRNOG00000003491	153.67	242	144.8	248.51	0.0441	1.72
ENSRNOG00000010635	1137.67	1600.33	1054.42	1809.14	0.0416	1.72
ENSRNOG00000060946	36.67	56.67	34.36	58.83	0.0342	1.71
ENSRNOG00000001704	31.33	45	28.88	49.45	0.0361	1.71
ENSRNOG00000011908	108.67	165.67	101.33	173.46	0.0407	1.71
ENSRNOG00000009033	33.33	50.33	32.03	54.81	0.0356	1.71
ENSRNOG00000061080	87.67	130.67	83.22	142.41	0.0337	1.71
ENSRNOG00000047191	14.67	23.33	13.78	23.57	0.0359	1.71
ENSRNOG00000000129	195.67	310.67	186.72	319.12	0.0484	1.71
ENSRNOG00000021103	142.67	215.67	137.56	234.96	0.0406	1.71
ENSRNOG00000047363	8.67	12.33	8.06	13.75	0.0374	1.71
ENSRNOG00000006378	375.67	579.33	352.05	599.82	0.0491	1.7
ENSRNOG00000042519	343.33	528	322.09	548.12	0.049	1.7
ENSRNOG00000017786	14134.7	21681.3	13943.5	23725.6	0.0424	1.7
ENSRNOG00000028895	307.67	497.67	299.83	509.62	0.0441	1.7
ENSRNOG00000015902	81.33	114.67	75.48	128.28	0.0356	1.7
ENSRNOG00000001229	544	792.33	516.14	877.1	0.0461	1.7
ENSRNOG00000060130	73.33	113.67	70.62	119.98	0.0394	1.7
ENSRNOG00000011987	273.67	425	255.67	434.28	0.0461	1.7
ENSRNOG00000016576	152	229.67	142.59	242.19	0.0407	1.7
ENSRNOG00000021018	9.33	15.67	9.29	15.77	0.0345	1.7
ENSRNOG00000006932	33	49	30.5	51.79	0.0367	1.7
ENSRNOG00000020369	408.67	662.33	403.54	684.91	0.0472	1.7
ENSRNOG00000001645	469.33	723	440.79	747.68	0.0395	1.7
ENSRNOG00000000787	244.33	395.67	231.51	392.67	0.0473	1.7
ENSRNOG00000058096	96	144	92.34	156.62	0.038	1.7
ENSRNOG00000018101	23	35.67	22.42	37.99	0.0357	1.69
ENSRNOG00000003613	68	101.67	64.31	108.94	0.0378	1.69
ENSRNOG00000002312	183	276.67	170.26	288.39	0.0395	1.69
ENSRNOG00000056151	59	87.67	56.27	95.27	0.0374	1.69
ENSRNOG00000027405	46.33	70.67	43.31	73.3	0.0369	1.69
ENSRNOG00000030151	29	42.33	26.89	45.41	0.0359	1.69
ENSRNOG00000003748	11	16.67	10.45	17.64	0.0343	1.69
ENSRNOG00000007613	138.67	200	131.97	222.59	0.034	1.69
ENSRNOG00000053968	53.67	78	50.97	85.96	0.0376	1.69
ENSRNOG00000031138	222.33	357.67	214.79	362.18	0.0405	1.69
ENSRNOG00000020485	60.67	90.67	57.35	96.66	0.0368	1.69
ENSRNOG00000031801	32.67	48	31.82	53.62	0.0344	1.68
ENSRNOG00000021726	111	168.33	103.95	175.1	0.0368	1.68
ENSRNOG00000040287	200.67	299	184.47	310.24	0.0375	1.68
ENSRNOG00000029980	516	811	484.68	814.93	0.0412	1.68
ENSRNOG00000046660	105	159.67	99.07	166.56	0.0404	1.68
ENSRNOG00000017406	140.67	211.67	133.35	224.19	0.0414	1.68
ENSRNOG00000005347	20	29.67	19.43	32.66	0.0361	1.68
ENSRNOG00000016653	17	25.67	15.94	26.78	0.0376	1.68
ENSRNOG00000023463	550.33	872	526.89	885.54	0.049	1.68
ENSRNOG00000008412	19	27.67	17.8	29.89	0.0346	1.68
ENSRNOG00000027145	53	79	49.86	83.72	0.0364	1.68
ENSRNOG00000010172	11.33	17.33	11.16	18.72	0.0367	1.68
ENSRNOG00000047782	23	36.67	21.71	36.39	0.0361	1.68
ENSRNOG00000002428	14.67	22	14.02	23.49	0.0334	1.68
ENSRNOG00000024272	101.33	152	95.97	160.77	0.0385	1.68
ENSRNOG00000016306	67	105	64.25	107.58	0.0393	1.67
ENSRNOG00000023951	31.33	49.67	29.94	50.1	0.038	1.67
ENSRNOG00000010519	34.67	54	33.62	56.25	0.0415	1.67
ENSRNOG00000007539	550	897.67	535.22	895.55	0.0471	1.67
ENSRNOG00000025736	16.33	23	15.78	26.39	0.047	1.67
ENSRNOG00000008105	14	20.67	13.54	22.61	0.0364	1.67
ENSRNOG00000054561	56.67	88	55.39	92.52	0.0363	1.67
ENSRNOG00000025053	3648.67	5484.33	3489.01	5827.18	0.038	1.67
ENSRNOG00000029330	73	114	68.23	113.95	0.0332	1.67
ENSRNOG00000010174	458.33	727.33	435.84	727.37	0.0407	1.67
ENSRNOG00000011341	162.33	242.33	149.81	249.95	0.038	1.67
ENSRNOG00000004089	289.67	411.67	273.97	457.03	0.0401	1.67
ENSRNOG00000027008	565	891.67	538.77	898.65	0.049	1.67
ENSRNOG00000019779	37.67	57.33	36.26	60.46	0.0406	1.67
ENSRNOG00000030149	21.33	31.33	19.72	32.87	0.0353	1.67
ENSRNOG00000053339	76.33	117.33	72.25	120.36	0.0398	1.67
ENSRNOG00000011137	85.67	127.67	79.64	132.67	0.0355	1.67
ENSRNOG00000014555	227	344.33	213.48	355.54	0.0471	1.67
ENSRNOG00000009145	58.67	86	54.85	91.32	0.0362	1.67
ENSRNOG00000012881	475	710.67	446.07	742.27	0.041	1.66
ENSRNOG00000010515	35	52	32.47	54.03	0.0367	1.66
ENSRNOG00000020038	424.33	618	412.88	686.43	0.0406	1.66
ENSRNOG00000029651	12.67	19.67	12.19	20.26	0.0371	1.66
ENSRNOG00000057228	12	18.67	11.39	18.94	0.0441	1.66
ENSRNOG00000013215	23.33	36	22.85	37.97	0.0367	1.66
ENSRNOG00000019099	13.67	21.67	12.96	21.52	0.036	1.66
ENSRNOG00000048053	51.33	83.67	50.31	83.57	0.0361	1.66
ENSRNOG00000002167	24.33	39.33	23.13	38.41	0.0345	1.66
ENSRNOG00000008243	36.67	58	35.77	59.38	0.0406	1.66
ENSRNOG00000000368	11.33	17.67	11.24	18.66	0.036	1.66
ENSRNOG00000000478	12.33	20	12.07	20.02	0.0349	1.66
ENSRNOG00000000414	127.67	190	119.2	197.68	0.0392	1.66
ENSRNOG00000007345	51.67	78.33	48.66	80.67	0.0336	1.66
ENSRNOG00000004057	147	221.67	137.75	228.3	0.0387	1.66
ENSRNOG00000015133	494.33	738.33	467.74	775.14	0.0416	1.66
ENSRNOG00000009932	24.33	33.67	22.57	37.37	0.0378	1.66
ENSRNOG00000002305	31	47.67	29.3	48.51	0.0365	1.66
ENSRNOG00000027359	14.67	22	13.58	22.49	0.0361	1.66
ENSRNOG00000021137	61.33	90.33	58.87	97.45	0.0355	1.66
ENSRNOG00000058105	9930	14780.3	9665.62	15988.2	0.0454	1.65
ENSRNOG00000006860	16	25.67	15.13	25.02	0.0375	1.65
ENSRNOG00000012111	30.67	46.67	29.37	48.56	0.0361	1.65
ENSRNOG00000012557	94.67	137.33	91.79	151.73	0.0376	1.65
ENSRNOG00000056359	14.67	20	13.95	23.06	0.0466	1.65
ENSRNOG00000002171	358.67	543.33	340.38	562.27	0.0356	1.65
ENSRNOG00000025676	25.33	38	24.23	40.01	0.0365	1.65
ENSRNOG00000021525	215.67	311.33	201.94	333.51	0.0385	1.65
ENSRNOG00000021441	95.33	138	88.03	145.26	0.0333	1.65
ENSRNOG00000009037	457	664.33	426.37	703.03	0.0439	1.65
ENSRNOG00000049425	26.33	37.67	24.76	40.81	0.0346	1.65
ENSRNOG00000027191	458	666	427.21	704.21	0.0414	1.65
ENSRNOG00000033192	220.67	324	203.38	335.16	0.0379	1.65
ENSRNOG00000056108	18	26.67	17	27.96	0.0364	1.64
ENSRNOG00000002776	23.67	37	22.53	37.04	0.0371	1.64
ENSRNOG00000060107	38	58	36.24	59.57	0.0396	1.64
ENSRNOG00000017392	15	21.67	13.69	22.48	0.0454	1.64
ENSRNOG00000024878	14	21.33	13.37	21.96	0.0345	1.64
ENSRNOG00000049849	22.67	32	20.98	34.44	0.036	1.64
ENSRNOG00000027253	17.33	25.33	16.8	27.58	0.036	1.64
ENSRNOG00000001419	91.33	118.67	88.09	144.52	0.047	1.64
ENSRNOG00000007284	192.33	302	186.26	305.52	0.0469	1.64
ENSRNOG00000019065	17	25.67	15.97	26.19	0.0347	1.64
ENSRNOG00000042826	31.33	46.67	29.47	48.31	0.0349	1.64
ENSRNOG00000010840	161	243.67	153.35	251.2	0.0469	1.64
ENSRNOG00000029876	33.67	47.33	31.19	51.08	0.0361	1.64
ENSRNOG00000017933	17.67	25.67	16.39	26.82	0.0361	1.64
ENSRNOG00000010950	27	41	25.84	42.27	0.0406	1.64
ENSRNOG00000027756	148.33	220	139.6	228.23	0.0407	1.63
ENSRNOG00000046181	19.33	29.67	18.49	30.21	0.0374	1.63
ENSRNOG00000024594	16.67	25	16.13	26.34	0.0385	1.63
ENSRNOG00000009588	15.33	23.33	14.83	24.21	0.0382	1.63
ENSRNOG00000000036	20.33	29.67	19.71	32.16	0.0344	1.63
ENSRNOG00000024703	69	100	65.05	106.05	0.0357	1.63
ENSRNOG00000020066	16	24	15.19	24.76	0.0331	1.63
ENSRNOG00000011913	402.67	547	366.48	596.95	0.0363	1.63
ENSRNOG00000049862	18	27.33	16.94	27.59	0.0358	1.63
ENSRNOG00000025539	187	268	172.6	281.04	0.0369	1.63
ENSRNOG00000052070	86.33	119.33	82.41	134.17	0.0353	1.63
ENSRNOG00000007636	41.33	63	39.48	64.26	0.0379	1.63
ENSRNOG00000042679	141	205.67	133.02	216.45	0.0415	1.63
ENSRNOG00000037227	155	228	143.56	233.59	0.0366	1.63
ENSRNOG00000003576	54.67	81	51.83	84.34	0.0331	1.63
ENSRNOG00000015461	513.33	766.33	496.61	807.99	0.047	1.63
ENSRNOG00000023643	20.67	27.67	19.43	31.61	0.0477	1.63
ENSRNOG00000011435	42.67	62.67	40.24	65.44	0.034	1.63
ENSRNOG00000027296	18	26	17	27.62	0.0382	1.62
ENSRNOG00000054049	93	142.67	88.92	144.43	0.0393	1.62
ENSRNOG00000005810	19	26.33	17.37	28.2	0.039	1.62
ENSRNOG00000031997	103.33	151.33	96.08	155.82	0.0334	1.62
ENSRNOG00000027037	28.67	44	27.44	44.5	0.0344	1.62
ENSRNOG00000004540	499.33	715	482.49	782.08	0.0473	1.62
ENSRNOG00000054437	38	55.33	36.05	58.4	0.0346	1.62
ENSRNOG00000007152	408.33	631.67	390	631.75	0.0465	1.62
ENSRNOG00000005007	39.67	58.33	35.92	58.17	0.0439	1.62
ENSRNOG00000015994	11	18	10.78	17.46	0.045	1.62
ENSRNOG00000028390	53.33	79.67	51.11	82.75	0.0369	1.62
ENSRNOG00000004265	23.33	35	21.98	35.53	0.0376	1.62
ENSRNOG00000002723	45	66.67	42.1	68.07	0.0346	1.62
ENSRNOG00000018778	14.33	21.33	13.98	22.59	0.0344	1.62
ENSRNOG00000042118	39	55.67	36.58	59.13	0.0375	1.62
ENSRNOG00000016412	191.67	289	186.47	301.21	0.0473	1.62
ENSRNOG00000008492	26.67	37.67	25.27	40.83	0.0363	1.62
ENSRNOG00000018012	242.33	349.67	227.58	367.51	0.0468	1.61
ENSRNOG00000061533	15.67	23	14.65	23.66	0.0365	1.61
ENSRNOG00000005540	25	37.67	23.9	38.58	0.0405	1.61
ENSRNOG00000009370	319.67	465	310.11	500.31	0.0447	1.61
ENSRNOG00000040122	34.33	51.33	33.6	54.2	0.0331	1.61
ENSRNOG00000008915	23.33	35	22.7	36.62	0.036	1.61
ENSRNOG00000019959	45	63.67	43.82	70.66	0.0378	1.61
ENSRNOG00000010977	520.33	695.67	489.46	789.19	0.0375	1.61
ENSRNOG00000005639	40	57.33	37.97	61.22	0.0372	1.61
ENSRNOG00000058681	34.33	51	32.57	52.5	0.0341	1.61
ENSRNOG00000014361	19	28	18.22	29.37	0.0378	1.61
ENSRNOG00000010608	45	65.67	41.78	67.33	0.0361	1.61
ENSRNOG00000006526	482.33	695	460.13	741.51	0.0466	1.61
ENSRNOG00000031669	110.33	151.67	103.96	167.49	0.0364	1.61
ENSRNOG00000013624	24.33	35	22.44	36.13	0.0362	1.61
ENSRNOG00000042576	28	38.67	26.34	42.39	0.0359	1.61
ENSRNOG00000051079	8.67	13	8.25	13.27	0.036	1.61
ENSRNOG00000028149	116.33	173.33	110.01	176.87	0.0398	1.61
ENSRNOG00000015898	104	151	98.47	158.27	0.04	1.61
ENSRNOG00000024825	21	30.67	20.02	32.18	0.033	1.61
ENSRNOG00000007202	86.67	126	79.17	127.22	0.0348	1.61
ENSRNOG00000005917	31	42.33	29.9	48.02	0.0388	1.61
ENSRNOG00000014661	46	66.33	42.87	68.83	0.0357	1.61
ENSRNOG00000011058	1585	2317	1497.6	2403.02	0.00849	1.6
ENSRNOG00000001103	94	133.67	89.92	144.29	0.0341	1.6
ENSRNOG00000013306	30	45.67	28.58	45.85	0.036	1.6
ENSRNOG00000020136	24.33	34	23.18	37.19	0.0361	1.6
ENSRNOG00000023664	21	30.67	20.25	32.47	0.0374	1.6
ENSRNOG00000005135	23	33	21.43	34.35	0.0361	1.6
ENSRNOG00000010626	40	55.67	37.7	60.42	0.035	1.6
ENSRNOG00000022769	177	264.33	168.76	270.34	0.0389	1.6
ENSRNOG00000053550	485.33	695	455.25	729.23	0.0431	1.6
ENSRNOG00000015160	42.67	59.33	40.02	64.02	0.0359	1.6
ENSRNOG00000015075	92.67	143	90.16	144.23	0.0349	1.6
ENSRNOG00000002750	308.33	433	289.09	462.37	0.04	1.6
ENSRNOG00000024952	222	322.67	207.71	332.17	0.0407	1.6
ENSRNOG00000009867	585.33	836	566.81	906.28	0.0473	1.6
ENSRNOG00000058166	25.33	35	23.82	38.08	0.036	1.6
ENSRNOG00000026252	14.33	21.33	13.63	21.78	0.0376	1.6
ENSRNOG00000026248	123.33	179	117.12	187.12	0.0413	1.6
ENSRNOG00000020456	409.33	589	387.07	618.04	0.0431	1.6
ENSRNOG00000029614	49	70.33	46.04	73.49	0.0332	1.6
ENSRNOG00000016108	56	82	52.64	83.96	0.035	1.6
ENSRNOG00000016967	30	43.33	28.68	45.75	0.0331	1.6
ENSRNOG00000023579	290.33	422.33	272.44	434.35	0.0441	1.59
ENSRNOG00000000034	80.67	118.67	76.79	122.42	0.0399	1.59
ENSRNOG00000000257	49.33	72.33	47.71	75.97	0.0364	1.59
ENSRNOG00000009656	66.67	89	64.61	102.87	0.0385	1.59
ENSRNOG00000045924	763.67	1166.67	742.14	1181.45	0.0486	1.59
ENSRNOG00000032307	58	82	54.09	86.05	0.0369	1.59
ENSRNOG00000013690	13.33	18.33	12.74	20.27	0.0454	1.59
ENSRNOG00000016889	21.33	31.67	20.44	32.52	0.0382	1.59
ENSRNOG00000010065	67.33	94.67	64.21	102.13	0.0373	1.59
ENSRNOG00000043151	24.67	36.33	23.15	36.82	0.0358	1.59
ENSRNOG00000027099	26.67	39.33	25.59	40.7	0.0366	1.59
ENSRNOG00000061328	26	37.33	24.14	38.39	0.0361	1.59
ENSRNOG00000052840	114.33	163	107.35	170.7	0.037	1.59
ENSRNOG00000031475	233.67	329.33	226.93	360.63	0.038	1.59
ENSRNOG00000026607	10.67	14.67	10.21	16.22	0.038	1.59
ENSRNOG00000010997	184	262.67	170.07	269.91	0.0344	1.59
ENSRNOG00000028137	65.33	91.33	59.82	94.9	0.036	1.59
ENSRNOG00000058470	149	191.33	135.05	214.14	0.036	1.59
ENSRNOG00000020097	210.33	314	206.79	327.7	0.0413	1.58
ENSRNOG00000017864	291.33	411.33	273.81	433.88	0.0471	1.58
ENSRNOG00000049302	253.33	356.67	234.07	370.86	0.0385	1.58
ENSRNOG00000005472	72.67	105	67.21	106.41	0.0348	1.58
ENSRNOG00000037462	16.33	23.67	15.62	24.72	0.0361	1.58
ENSRNOG00000052376	23.67	33	22.34	35.34	0.0351	1.58
ENSRNOG00000020119	47.33	66	44.97	71.09	0.036	1.58
ENSRNOG00000051100	15.33	21	13.88	21.94	0.0481	1.58
ENSRNOG00000008652	230.67	330.33	219.85	347.42	0.0472	1.58
ENSRNOG00000043416	85.33	117.33	81.59	128.85	0.0375	1.58
ENSRNOG00000013720	762	1046.67	728.45	1149.56	0.0451	1.58
ENSRNOG00000013267	705.33	1063.33	677.4	1068.74	0.04	1.58
ENSRNOG00000033729	32	46.33	30.35	47.88	0.0375	1.58
ENSRNOG00000043193	34.33	46.33	32.62	51.42	0.036	1.58
ENSRNOG00000002403	229	322.33	215.11	339.02	0.0386	1.58
ENSRNOG00000001953	168.67	238.67	161.96	255.24	0.038	1.58
ENSRNOG00000009184	197	283.33	188.75	297.43	0.0476	1.58
ENSRNOG00000024089	421.33	594.67	397.74	626.65	0.0419	1.58
ENSRNOG00000015560	171.67	244.67	160.86	253.24	0.0367	1.57
ENSRNOG00000015692	404.67	573.33	377.9	594.94	0.0479	1.57
ENSRNOG00000001928	69.33	99.67	64.82	102.03	0.0373	1.57
ENSRNOG00000004307	147.33	210.33	141.78	222.94	0.0391	1.57
ENSRNOG00000022921	36	50.67	35.08	55.14	0.0344	1.57
ENSRNOG00000016357	82	118.33	77.35	121.57	0.0334	1.57
ENSRNOG00000016680	634.67	893.67	596.6	937.64	0.0419	1.57
ENSRNOG00000050729	16	23.33	15.1	23.73	0.0361	1.57
ENSRNOG00000006684	68.33	96.33	63.61	99.94	0.037	1.57
ENSRNOG00000007100	72.67	106.33	70.66	111	0.038	1.57
ENSRNOG00000056658	54.33	78.67	51.73	81.27	0.0346	1.57
ENSRNOG00000016163	50.67	72	47.76	75.02	0.0356	1.57
ENSRNOG00000061739	50.33	74.33	47.04	73.89	0.0375	1.57
ENSRNOG00000009411	34.67	50.33	33.42	52.49	0.0333	1.57
ENSRNOG00000026490	71	100	67.5	106	0.0336	1.57
ENSRNOG00000017605	39	56	37.26	58.51	0.0377	1.57
ENSRNOG00000013491	400.67	573.33	375.48	589.49	0.0449	1.57
ENSRNOG00000054990	49	63.67	46.75	73.39	0.0472	1.57
ENSRNOG00000033528	40.67	54.67	37.9	59.5	0.0372	1.57
ENSRNOG00000017704	256.67	354.33	245.37	385.02	0.0395	1.57
ENSRNOG00000033693	18.33	25	17.09	26.81	0.0379	1.57
ENSRNOG00000011105	38	55	35.56	55.68	0.0343	1.57
ENSRNOG00000002153	39.67	57.33	37.48	58.65	0.0333	1.56
ENSRNOG00000015727	43.67	62.33	40.57	63.45	0.0361	1.56
ENSRNOG00000007440	31.67	45	29.58	46.26	0.0355	1.56
ENSRNOG00000007033	27	37.67	25.79	40.32	0.0356	1.56
ENSRNOG00000017466	3073.67	4440.33	2973.18	4646.27	0.0201	1.56
ENSRNOG00000006604	74	95.67	67.63	105.65	0.0403	1.56
ENSRNOG00000007956	80.33	112.67	74.97	117.06	0.0366	1.56
ENSRNOG00000029205	53.67	74	49.71	77.61	0.036	1.56
ENSRNOG00000018551	15	21.33	14.13	22.04	0.0361	1.56
ENSRNOG00000000190	165.67	232.33	157.38	245.52	0.0396	1.56
ENSRNOG00000012364	192.67	272	182.95	285.38	0.0391	1.56
ENSRNOG00000018122	36.33	50	34.53	53.85	0.0364	1.56
ENSRNOG00000014797	274.67	387	260.96	406.84	0.0474	1.56
ENSRNOG00000026702	21.67	31.67	20.6	32.12	0.036	1.56
ENSRNOG00000049128	369	528.33	343.64	535.6	0.0383	1.56
ENSRNOG00000039200	22.67	30.67	21.31	33.21	0.0361	1.56
ENSRNOG00000002538	30.67	43	29.13	45.39	0.0375	1.56
ENSRNOG00000002844	10.33	15.67	10.11	15.75	0.0344	1.56
ENSRNOG00000007662	92.33	129	86.41	134.55	0.0354	1.56
ENSRNOG00000008129	26.33	37.33	24.6	38.31	0.0359	1.56
ENSRNOG00000011713	32	45	29.67	46.19	0.0365	1.56
ENSRNOG00000017672	379.33	556.67	367.76	572.52	0.0424	1.56
ENSRNOG00000032070	67	94.67	63.67	99.09	0.0363	1.56
ENSRNOG00000011977	302	424	286.02	445.11	0.0461	1.56
ENSRNOG00000009196	255.67	347.33	240.51	374.21	0.0397	1.56
ENSRNOG00000059857	208	297.67	201.14	312.89	0.0386	1.56
ENSRNOG00000022777	11.67	15.67	11.11	17.28	0.0452	1.56
ENSRNOG00000009258	67.67	94	64.14	99.74	0.0332	1.56
ENSRNOG00000053587	13.33	20.33	12.86	20	0.0414	1.56
ENSRNOG00000033123	23.67	35.33	22.67	35.25	0.0361	1.55
ENSRNOG00000051029	12.67	19	12.19	18.95	0.0404	1.55
ENSRNOG00000003472	74.67	99.67	68.09	105.82	0.0368	1.55
ENSRNOG00000052695	10	13.67	9.65	15	0.0367	1.55
ENSRNOG00000049724	35.67	52.33	34.48	53.5	0.0362	1.55
ENSRNOG00000060460	140.33	199.33	132.3	205.28	0.0364	1.55
ENSRNOG00000002176	72	101.67	68.36	106.05	0.0377	1.55
ENSRNOG00000019921	15.67	21	15.16	23.5	0.0472	1.55
ENSRNOG00000024964	265.67	372.33	250.6	388.55	0.0443	1.55
ENSRNOG00000000708	37	51	35.21	54.56	0.0343	1.55
ENSRNOG00000011696	503.33	705.67	466.66	722.96	0.0439	1.55
ENSRNOG00000014452	268.33	377.33	258.41	400.25	0.0463	1.55
ENSRNOG00000010326	18.67	26	17.55	27.17	0.0344	1.55
ENSRNOG00000042951	220.33	308.33	205.38	317.9	0.038	1.55
ENSRNOG00000022343	132.33	185.67	125.36	193.97	0.038	1.55
ENSRNOG00000018835	224.67	304.67	210.69	325.95	0.0374	1.55
ENSRNOG00000003840	38.33	51.33	37.24	57.61	0.0387	1.55
ENSRNOG00000052445	90.33	123	83.96	129.81	0.0363	1.55
ENSRNOG00000017525	21.67	29.67	19.91	30.75	0.0392	1.54
ENSRNOG00000012546	17.33	24.67	16.67	25.75	0.041	1.54
ENSRNOG00000008194	922	1373	901.68	1392.37	0.0354	1.54
ENSRNOG00000028774	45.67	60.33	42.95	66.29	0.036	1.54
ENSRNOG00000021182	75	103.67	71.02	109.56	0.0344	1.54
ENSRNOG00000016308	33.33	45.33	30.85	47.57	0.0368	1.54
ENSRNOG00000018606	36.67	52.67	35.18	54.24	0.0369	1.54
ENSRNOG00000057569	11872.3	16558.3	11165.5	17207.3	0.0153	1.54
ENSRNOG00000029466	34	47	31.81	49.02	0.0345	1.54
ENSRNOG00000018082	57.33	80	53.29	82.12	0.0343	1.54
ENSRNOG00000005124	57.33	82	54.3	83.68	0.0333	1.54
ENSRNOG00000012645	237.67	341	227.84	350.92	0.0461	1.54
ENSRNOG00000014953	18.33	26.67	17.48	26.9	0.0447	1.54
ENSRNOG00000005679	86.67	115	79.74	122.73	0.0359	1.54
ENSRNOG00000049028	41.67	57.67	38.94	59.92	0.0361	1.54
ENSRNOG00000012681	929	1348.33	904.68	1392.06	0.0412	1.54
ENSRNOG00000007886	32.33	47.33	31.35	48.22	0.0331	1.54
ENSRNOG00000059500	62	86	60.81	93.46	0.0345	1.54
ENSRNOG00000039924	14	19	13.41	20.59	0.0361	1.54
ENSRNOG00000005122	34	50	33.13	50.84	0.0373	1.53
ENSRNOG00000019141	15	19.67	13.91	21.35	0.0493	1.53
ENSRNOG00000006641	25	37.67	24.6	37.72	0.036	1.53
ENSRNOG00000027152	77	104.67	71.72	109.96	0.0362	1.53
ENSRNOG00000003643	26.67	36	25.09	38.46	0.0361	1.53
ENSRNOG00000018467	49.67	73.67	48.24	73.91	0.0372	1.53
ENSRNOG00000014902	77.33	107	74.33	113.85	0.0331	1.53
ENSRNOG00000021916	34.33	48.67	32.46	49.71	0.0345	1.53
ENSRNOG00000048161	17	24.33	16.54	25.31	0.033	1.53
ENSRNOG00000037632	29.67	43	28.49	43.52	0.0334	1.53
ENSRNOG00000050869	234.67	318.33	223.69	341.66	0.0377	1.53
ENSRNOG00000013521	33.67	47.33	31.72	48.42	0.036	1.53
ENSRNOG00000042029	124.33	167.33	120.71	184.22	0.0366	1.53
ENSRNOG00000046469	11.67	15.67	10.99	16.77	0.0362	1.53
ENSRNOG00000006000	243	335.33	230.93	352.17	0.0463	1.53
ENSRNOG00000005391	458	636	429.37	654.75	0.0443	1.52
ENSRNOG00000019914	68.67	97.67	67.53	102.96	0.0371	1.52
ENSRNOG00000046779	32.33	48	31.07	47.36	0.0377	1.52
ENSRNOG00000004516	439	593.67	414.72	631.95	0.0464	1.52
ENSRNOG00000027839	132.33	175	125.94	191.73	0.0375	1.52
ENSRNOG00000038436	766.67	1057	721.49	1098.34	0.0415	1.52
ENSRNOG00000052725	61	88.33	59.13	90.01	0.0371	1.52
ENSRNOG00000008173	231	315.67	217.81	331.56	0.0397	1.52
ENSRNOG00000009403	40.33	55.67	37.91	57.64	0.0367	1.52
ENSRNOG00000014532	245.33	317.33	223.14	339.2	0.0348	1.52
ENSRNOG00000003581	55.67	73.67	53.23	80.91	0.0367	1.52
ENSRNOG00000011967	23.67	32.67	22.53	34.25	0.0345	1.52
ENSRNOG00000024452	29.33	43.33	28.56	43.39	0.036	1.52
ENSRNOG00000011879	1184.67	1644.33	1118.54	1698.62	0.0427	1.52
ENSRNOG00000017181	141	204	135.35	205.52	0.0362	1.52
ENSRNOG00000032048	82.67	111.33	79.29	120.4	0.037	1.52
ENSRNOG00000006645	160.33	215.33	152.49	231.45	0.0346	1.52
ENSRNOG00000002831	17.67	22.67	16.5	25.03	0.0486	1.52
ENSRNOG00000038746	19.67	25.67	18.16	27.55	0.047	1.52
ENSRNOG00000052157	239.67	324.67	226.68	343.79	0.0393	1.52
ENSRNOG00000002932	53.67	74.67	50.93	77.2	0.0331	1.52
ENSRNOG00000011752	262.67	359.67	246.25	373.13	0.0385	1.52
ENSRNOG00000018992	254	337.33	234.42	355.17	0.0334	1.52
ENSRNOG00000024479	30.67	43.33	28.89	43.77	0.0361	1.52
ENSRNOG00000007012	14.67	19.67	13.67	20.71	0.0447	1.51
ENSRNOG00000031342	13.33	18.33	12.28	18.59	0.046	1.51
ENSRNOG00000005615	755.33	1101.33	735.75	1114.25	0.049	1.51
ENSRNOG00000057416	29.67	41	27.68	41.92	0.0364	1.51
ENSRNOG00000043077	501	674	486.73	736.96	0.0385	1.51
ENSRNOG00000018214	133	182	129.69	196.34	0.036	1.51
ENSRNOG00000008331	333	447.33	308.21	466.5	0.038	1.51
ENSRNOG00000004141	209.33	282.67	203.78	308.4	0.0339	1.51
ENSRNOG00000001687	638.33	881.67	600.36	908.55	0.049	1.51
ENSRNOG00000014828	564.33	779	549.66	831.47	0.0448	1.51
ENSRNOG00000001124	17	24	16.6	25.11	0.0361	1.51
ENSRNOG00000007764	121.33	161.33	113.15	171.11	0.0349	1.51
ENSRNOG00000025174	663.33	919.67	627.06	948.03	0.0448	1.51
ENSRNOG00000033169	592	801	554.59	838.12	0.0437	1.51
ENSRNOG00000012346	530.33	739	499.43	754.72	0.0419	1.51
ENSRNOG00000013948	402.67	570	382.12	577.36	0.0397	1.51
ENSRNOG00000059947	80.67	102.33	75.33	113.77	0.0376	1.51
ENSRNOG00000000456	302.33	413.33	292.28	441.32	0.0394	1.51
ENSRNOG00000045636	197.33	269	190.28	287.25	0.0399	1.51
ENSRNOG00000042404	17.33	23	16.55	24.98	0.0429	1.51
ENSRNOG00000026128	135	184	126.5	190.93	0.0363	1.51
ENSRNOG00000056550	187.67	264.33	179.44	270.76	0.0364	1.51
ENSRNOG00000013389	12.67	17.33	11.71	17.67	0.0456	1.51
ENSRNOG00000024210	31.33	44.33	29.37	44.3	0.037	1.51
ENSRNOG00000053691	1424.67	1960.33	1375.92	2075.11	0.0408	1.51
ENSRNOG00000016334	237	315.33	218.01	328.7	0.0343	1.51
ENSRNOG00000057710	973.33	1351	928.44	1399.04	0.0477	1.51
ENSRNOG00000039890	115.33	163.67	109.03	164.29	0.0363	1.51
ENSRNOG00000011619	276	365.33	256.46	386.27	0.0367	1.51
ENSRNOG00000013884	123.67	162.67	116.1	174.84	0.0369	1.51
ENSRNOG00000004332	66.33	87	62.24	93.69	0.0353	1.51
ENSRNOG00000021203	171.33	231	159.5	240.08	0.0353	1.51
ENSRNOG00000043085	135	191.33	124.51	187.27	0.037	1.5
ENSRNOG00000009137	37	52.33	34.84	52.39	0.0387	1.5
ENSRNOG00000056153	201.67	278	191.82	288.44	0.0401	1.5
ENSRNOG00000047137	703.33	961.33	667.1	1002.77	0.0363	1.5
ENSRNOG00000025428	26.33	35.33	24.91	37.43	0.0344	1.5
ENSRNOG00000047349	33.67	45	31.31	47.04	0.037	1.5
ENSRNOG00000046548	14	21	13.95	20.95	0.048	1.5
ENSRNOG00000055020	29	42.33	28.72	43.1	0.0367	1.5
ENSRNOG00000014509	626.67	863	585.26	878.16	0.0396	1.5
ENSRNOG00000005879	94	125.33	89.41	134.13	0.0372	1.5
ENSRNOG00000015232	102.33	146.33	99.79	149.7	0.0364	1.5
