# Supplementary material for: Antiapoptosis and Antifibrosis Effects of Qishen Granules on Heart Failure Rats via Hippo Pathway
Source: Biomed Res Int. 2019 Dec 12;2019:1642575. doi: 10.1155/2019/1642575 (PMC6930732; doi:10.1155/2019/1642575)
Supplement: Supplementary Materials — Table S1: the upregulated differentially expressed genes between model and sham groups. Table S2: the downregulated differentially expressed genes between model and sham groups. Table S3: the upregulated differentially expressed genes between QSG and model groups. Table S4: the downregulated differentially expressed genes between QSG and model groups. [file 1642575.f1.zip › 1642575.f1/Tables S2.xls]

## Sheet: Tables S2
Table S2 The down-regulated differentially expressed genes between model and sham groups.
	Ensembl.ID	Sham.Expression	Model.Expression	TMM.normalized.Sham.expression	TMM.normalized.Model.expression	FDR	Fold.Change
1	ENSRNOG00000030478	15614.7	1008	16817	1093.47	0.0273	0.07
2	ENSRNOG00000056970	8.33	0	7.58	0.53	0.0408	0.07
3	ENSRNOG00000060518	5885	465	6333.78	530.9	0.0321	0.08
4	ENSRNOG00000046453	11.67	0.67	11.56	1.01	0.0488	0.09
5	ENSRNOG00000014409	2085	257.67	2211.16	289.22	0.0227	0.13
6	ENSRNOG00000002450	95	16.67	100.37	16.58	0.0484	0.17
7	ENSRNOG00000030524	8	1	8.03	1.33	0.0477	0.17
8	ENSRNOG00000003616	14.67	2.67	13.23	3.06	0.048	0.23
9	ENSRNOG00000022896	35	8.67	37.32	8.76	0.0479	0.23
10	ENSRNOG00000014387	34.67	8	35.31	8.99	0.0425	0.25
11	ENSRNOG00000054174	16	4.33	16.81	4.33	0.0457	0.26
12	ENSRNOG00000055025	11.33	2.33	10.18	2.64	0.0453	0.26
13	ENSRNOG00000010079	14	3.33	13.46	3.78	0.0448	0.28
14	ENSRNOG00000003741	15.67	4.33	14.84	4.27	0.0467	0.29
15	ENSRNOG00000026679	3616.67	974.67	3475.01	1008.43	6.99e-15	0.29
16	ENSRNOG00000011672	20.33	5	17.94	5.51	0.0366	0.31
17	ENSRNOG00000038132	52.33	14.33	46.05	14.29	0.0375	0.31
18	ENSRNOG00000008057	18	4.67	16.59	5.28	0.0478	0.32
19	ENSRNOG00000001159	12.33	3.33	12.02	3.92	0.0413	0.33
20	ENSRNOG00000018453	123.33	41.67	127.91	42.22	0.0454	0.33
21	ENSRNOG00000030253	17.33	6	17.23	5.76	0.0449	0.33
22	ENSRNOG00000006151	122	36.33	109.91	37.06	0.0463	0.34
23	ENSRNOG00000060438	35.33	10.67	35	12.03	0.0451	0.34
24	ENSRNOG00000013433	28.67	10.33	28.22	10	0.044	0.35
25	ENSRNOG00000048039	40.67	14.33	38.23	13.7	0.0449	0.36
26	ENSRNOG00000007866	46	12	40.38	14.51	0.0354	0.36
28	ENSRNOG00000014383	16	5.67	15.73	5.73	0.0452	0.36
29	ENSRNOG00000011351	21.33	8	20.68	7.58	0.0397	0.37
30	ENSRNOG00000009779	169.67	48.33	157.8	57.95	0.0446	0.37
31	ENSRNOG00000000239	119	37.33	106.08	39	0.0475	0.37
32	ENSRNOG00000050000	23.67	8	21.71	8.02	0.0472	0.37
33	ENSRNOG00000009662	21.67	8	21.36	7.98	0.0454	0.37
34	ENSRNOG00000010603	21	7.67	20.79	7.77	0.0442	0.37
35	ENSRNOG00000036692	173	65.67	169.96	65.48	0.0484	0.39
36	ENSRNOG00000024115	458.67	134	408.15	157.68	0.0446	0.39
37	ENSRNOG00000042018	19.67	8.33	20.68	8.09	0.0413	0.39
38	ENSRNOG00000058422	25.67	8	23.19	9.09	0.0397	0.39
39	ENSRNOG00000049096	22	7.33	20.14	7.93	0.044	0.39
40	ENSRNOG00000015262	37.67	14	36.34	14.34	0.0459	0.39
41	ENSRNOG00000014505	20.67	6.33	18.19	7.22	0.0348	0.4
42	ENSRNOG00000024243	39.33	14	36.48	14.49	0.0494	0.4
43	ENSRNOG00000005858	16	6	16.18	6.43	0.0455	0.4
44	ENSRNOG00000005023	25	9.33	24.38	9.76	0.0343	0.4
45	ENSRNOG00000055836	41.67	16	43.9	17.96	0.0343	0.41
46	ENSRNOG00000010134	2934.33	1157.33	2868.35	1174.56	7.66e-10	0.41
47	ENSRNOG00000013003	24.33	9.67	23.55	9.7	0.0426	0.41
48	ENSRNOG00000058245	17	6.67	16.26	6.78	0.0463	0.42
49	ENSRNOG00000035583	14.33	6	14.49	6.04	0.0362	0.42
50	ENSRNOG00000037815	1207.33	486	1186.52	495.48	0.0441	0.42
51	ENSRNOG00000010263	25.67	9	24.81	10.46	0.0379	0.42
52	ENSRNOG00000004438	9.67	3.33	8.7	3.68	0.0368	0.42
53	ENSRNOG00000060849	11.67	5.33	12.08	5.12	0.0352	0.42
55	ENSRNOG00000012067	1579	679	1494.77	633.56	0.0465	0.42
56	ENSRNOG00000011917	14	6	13.91	5.9	0.047	0.42
57	ENSRNOG00000020308	12028	4897	11737.8	4996.75	4.33e-15	0.43
58	ENSRNOG00000036672	27	9.33	24.08	10.28	0.035	0.43
59	ENSRNOG00000008693	21	8.33	21.09	9.01	0.0448	0.43
60	ENSRNOG00000029071	77.33	30.33	74.46	32.14	0.0451	0.43
61	ENSRNOG00000022859	22.33	8.33	20.12	8.74	0.0402	0.43
62	ENSRNOG00000028083	20.67	8.33	20.61	8.98	0.0341	0.44
63	ENSRNOG00000003025	20.67	8.67	19.84	8.69	0.048	0.44
64	ENSRNOG00000046216	68.67	26.33	63.23	27.76	0.0475	0.44
65	ENSRNOG00000025898	10.33	4.67	11.01	4.84	0.0385	0.44
66	ENSRNOG00000030788	19	8	19	8.48	0.0369	0.45
67	ENSRNOG00000060949	32	12.33	28.45	12.79	0.0348	0.45
68	ENSRNOG00000057501	78.67	35	77.28	34.75	0.0469	0.45
69	ENSRNOG00000021256	50	21.33	48.61	22.06	0.0421	0.45
70	ENSRNOG00000048644	28.33	13	27.3	12.48	0.0414	0.46
71	ENSRNOG00000005600	218.67	93.67	203.72	93.33	0.0447	0.46
72	ENSRNOG00000009177	17	6	15.41	7.06	0.0377	0.46
73	ENSRNOG00000019112	71.67	28	66.42	30.45	0.0471	0.46
74	ENSRNOG00000020635	171.67	76.67	173.71	79.79	0.0459	0.46
75	ENSRNOG00000047102	56.67	24	54.16	24.9	0.044	0.46
76	ENSRNOG00000060690	244	111.33	243.34	112.29	0.0491	0.46
77	ENSRNOG00000007900	22	9.33	21.65	10.04	0.0371	0.46
78	ENSRNOG00000045888	15.33	6.67	15	6.95	0.046	0.46
79	ENSRNOG00000061895	88.67	34.33	83.08	38.59	0.0356	0.46
82	ENSRNOG00000053059	22	10.33	22.18	10.33	0.0399	0.47
83	ENSRNOG00000012337	20.67	8.33	19.17	9.04	0.0399	0.47
84	ENSRNOG00000022738	14	6.33	13.9	6.57	0.0471	0.47
85	ENSRNOG00000036728	13.33	5.33	12.27	5.81	0.0397	0.47
86	ENSRNOG00000007159	190.33	73.33	169.18	80.2	0.0408	0.47
87	ENSRNOG00000007955	643.33	293.67	617.9	294.46	0.038	0.48
88	ENSRNOG00000007364	23.33	9	20.98	10.01	0.0363	0.48
89	ENSRNOG00000017637	23	11	22.61	10.81	0.0456	0.48
90	ENSRNOG00000005335	29.67	13.33	28.52	13.87	0.0454	0.49
91	ENSRNOG00000022691	27.67	12	26.95	13.11	0.0366	0.49
92	ENSRNOG00000036827	162.67	77.67	163.04	79.38	0.0458	0.49
93	ENSRNOG00000018094	10	4.33	9.59	4.67	0.0371	0.49
94	ENSRNOG00000017681	53.67	24.67	53.22	26.04	0.044	0.49
95	ENSRNOG00000009047	30	14	29.11	14.34	0.0378	0.49
96	ENSRNOG00000051536	36	20	38.56	19.03	0.0466	0.49
97	ENSRNOG00000014970	20.67	9.67	20.67	10.22	0.0403	0.49
98	ENSRNOG00000003049	62	28	60.89	30.16	0.0472	0.5
99	ENSRNOG00000008843	3969.33	1872	3890.92	1933.38	3.66e-15	0.5
100	ENSRNOG00000061850	87.67	42	84.77	42.17	0.0452	0.5
101	ENSRNOG00000018355	58	27.33	56.48	28.14	0.0433	0.5
102	ENSRNOG00000008015	968.33	436.67	899.77	452.6	0.0486	0.5
103	ENSRNOG00000014149	21.67	9.67	19.59	9.86	0.0353	0.5
104	ENSRNOG00000018766	35.33	17.67	35.47	17.85	0.0368	0.5
105	ENSRNOG00000005392	21.67	9.67	21.57	10.88	0.036	0.5
106	ENSRNOG00000031162	177.33	75	164.64	83.57	0.0381	0.51
107	ENSRNOG00000042524	22	9.67	19.57	10.02	0.0375	0.51
108	ENSRNOG00000023320	20	10.33	19.57	10.03	0.038	0.51
109	ENSRNOG00000035568	59.67	30	58.04	29.89	0.044	0.51
110	ENSRNOG00000009928	3076.67	1551.33	3038.36	1567.12	0.0345	0.52
111	ENSRNOG00000013766	16445.7	8043.67	15908.4	8231.35	1.7e-12	0.52
112	ENSRNOG00000032374	115.33	58	113.76	59.23	0.0476	0.52
113	ENSRNOG00000001342	46.67	23	45.91	24.04	0.0445	0.52
114	ENSRNOG00000007607	1503.67	749	1437.55	754.2	0.05	0.52
115	ENSRNOG00000008210	561	284	546.53	287.01	0.0381	0.53
116	ENSRNOG00000009198	47.33	24	45.49	23.91	0.0353	0.53
117	ENSRNOG00000057852	108.67	56	106.73	56.36	0.0465	0.53
118	ENSRNOG00000050846	53.33	27.33	52.13	27.58	0.0482	0.53
119	ENSRNOG00000012879	27419.7	13979.3	26956.7	14311.4	1.33e-14	0.53
120	ENSRNOG00000045738	288.33	146.33	275.73	146.58	0.0422	0.53
121	ENSRNOG00000031590	26	13.67	25.96	13.82	0.0349	0.53
122	ENSRNOG00000007266	30.33	16	29.78	15.86	0.0347	0.53
123	ENSRNOG00000006033	40.67	18.67	38.07	20.29	0.0398	0.53
124	ENSRNOG00000033915	723.67	371.67	710.2	378.74	0.0378	0.53
125	ENSRNOG00000021088	300.67	161	298.73	161.3	0.0473	0.54
126	ENSRNOG00000053332	64.67	29.33	61.23	33.11	0.0345	0.54
127	ENSRNOG00000011181	132.67	57.33	120.24	65.38	0.0349	0.54
128	ENSRNOG00000006807	59.33	31.33	57.91	31.73	0.0372	0.55
129	ENSRNOG00000022110	39.33	18.67	35.6	19.57	0.0347	0.55
130	ENSRNOG00000000582	40.33	22	40.21	22.11	0.0414	0.55
131	ENSRNOG00000003171	30.33	14	29.4	16.22	0.043	0.55
132	ENSRNOG00000047457	23.67	12.67	22.95	12.69	0.0414	0.55
133	ENSRNOG00000048771	324.33	152	296.92	164.61	0.0346	0.55
135	ENSRNOG00000008168	72	38.67	70.46	39.11	0.0342	0.56
136	ENSRNOG00000010076	22.33	10.33	20.83	11.57	0.0371	0.56
137	ENSRNOG00000012757	76.67	40	73.51	40.94	0.0474	0.56
138	ENSRNOG00000010092	202.67	109.33	198.01	110.62	0.0439	0.56
139	ENSRNOG00000023030	22.67	12	22.18	12.39	0.0409	0.56
140	ENSRNOG00000021174	6422.67	3409	6319.66	3536.01	0.0352	0.56
141	ENSRNOG00000013042	32.33	16.33	30.2	16.91	0.041	0.56
142	ENSRNOG00000018522	19	10.33	18.83	10.56	0.0406	0.56
143	ENSRNOG00000001874	45.33	23	44.48	24.98	0.0414	0.56
144	ENSRNOG00000033740	53.33	27.67	52.45	29.46	0.0348	0.56
145	ENSRNOG00000012290	87.67	47.33	86.61	48.78	0.0475	0.56
146	ENSRNOG00000025581	29.67	15.33	28.8	16.27	0.0454	0.56
147	ENSRNOG00000052467	30.33	15.67	28.7	16.25	0.0354	0.57
149	ENSRNOG00000013975	20.67	11.67	20.33	11.53	0.0348	0.57
150	ENSRNOG00000015353	42.33	21	41.28	23.42	0.0352	0.57
151	ENSRNOG00000014869	47	25	46.01	26.11	0.0441	0.57
152	ENSRNOG00000012280	29.33	14.33	26.44	15.01	0.0379	0.57
153	ENSRNOG00000030238	2890.67	1511.33	2816.15	1599.05	0.0309	0.57
154	ENSRNOG00000007811	18.67	9.33	18.03	10.24	0.0338	0.57
155	ENSRNOG00000059765	69.33	39	69.01	39.28	0.0413	0.57
156	ENSRNOG00000004537	1443.67	787.33	1401.31	798.13	0.0197	0.57
157	ENSRNOG00000022009	21	11.67	20.47	11.67	0.0405	0.57
158	ENSRNOG00000022946	174.67	96.67	169.56	96.72	0.0453	0.57
159	ENSRNOG00000059168	94.67	52	93.16	53.26	0.0441	0.57
160	ENSRNOG00000060310	21.33	11.33	20.6	11.79	0.0439	0.57
161	ENSRNOG00000033015	33	18	31.93	18.3	0.0456	0.57
162	ENSRNOG00000032994	164	94.33	163.52	93.9	0.0412	0.57
163	ENSRNOG00000003984	160	89	156.43	90.32	0.0425	0.58
164	ENSRNOG00000011645	70.67	40.67	71.08	41.04	0.0386	0.58
165	ENSRNOG00000013971	19.67	9.33	18.12	10.47	0.0378	0.58
166	ENSRNOG00000007030	34	18.67	32.36	18.72	0.0414	0.58
167	ENSRNOG00000000165	23.33	13.33	23.08	13.38	0.0413	0.58
168	ENSRNOG00000021067	57	33.67	56.98	33.04	0.035	0.58
169	ENSRNOG00000034290	763	388	702.6	407.71	0.0452	0.58
170	ENSRNOG00000000386	307.67	173	299.76	173.96	0.048	0.58
171	ENSRNOG00000057116	121.67	68.67	119.09	69.19	0.0462	0.58
172	ENSRNOG00000033618	18.67	9.67	17.24	10.02	0.0349	0.58
173	ENSRNOG00000015260	64.33	31.67	59.75	34.79	0.0379	0.58
174	ENSRNOG00000010244	47.67	26	45.66	26.61	0.0451	0.58
175	ENSRNOG00000014218	88	49	86.83	50.63	0.0425	0.58
176	ENSRNOG00000005619	24.67	13.67	24.63	14.37	0.0401	0.58
177	ENSRNOG00000014104	147.33	78.33	144.76	84.54	0.0426	0.58
178	ENSRNOG00000000542	27.33	16	27.02	15.82	0.0347	0.59
179	ENSRNOG00000059558	15	8.33	14.39	8.43	0.0353	0.59
180	ENSRNOG00000054549	144.67	77.67	138.48	81.16	0.041	0.59
181	ENSRNOG00000006237	41.67	23	41.16	24.14	0.0341	0.59
182	ENSRNOG00000013437	46	24.67	44.32	26.02	0.041	0.59
183	ENSRNOG00000047565	19.67	11	19.57	11.5	0.0414	0.59
184	ENSRNOG00000024543	130	73	125.52	73.82	0.0483	0.59
185	ENSRNOG00000016432	84.67	49	82.71	48.65	0.039	0.59
186	ENSRNOG00000049829	79.33	44	76.35	45.12	0.0373	0.59
187	ENSRNOG00000037718	31.67	18.33	30.4	18.03	0.0336	0.59
188	ENSRNOG00000011668	375.33	205	368.86	219.14	0.0452	0.59
189	ENSRNOG00000058283	22.33	12.67	21.46	12.77	0.0368	0.59
190	ENSRNOG00000014522	3224	1796	3148.41	1882.98	0.0425	0.6
191	ENSRNOG00000032446	23.67	13.33	23.14	13.86	0.0352	0.6
192	ENSRNOG00000057241	23.67	12.67	22.12	13.25	0.0369	0.6
193	ENSRNOG00000030154	30.33	17.67	29.67	17.78	0.0348	0.6
195	ENSRNOG00000012562	165.67	92	160.79	96.47	0.044	0.6
196	ENSRNOG00000033146	17	9.67	17.41	10.47	0.0392	0.6
197	ENSRNOG00000012436	123.33	67	114.58	69.05	0.0349	0.6
199	ENSRNOG00000051285	75.67	43.67	73.58	44.36	0.0402	0.6
200	ENSRNOG00000047653	155	89.33	154.8	93.42	0.0405	0.6
201	ENSRNOG00000003872	134	74.33	125.77	76.04	0.0362	0.6
202	ENSRNOG00000051621	21	12.33	20.1	12.15	0.0346	0.6
203	ENSRNOG00000029514	63	36	59.74	36.12	0.0361	0.6
204	ENSRNOG00000005705	20.67	11.67	19.84	12	0.0342	0.6
205	ENSRNOG00000014948	200.33	113	193.75	117.32	0.0455	0.61
206	ENSRNOG00000013468	284	158.67	277.3	167.93	0.0451	0.61
207	ENSRNOG00000032924	107	65.67	111.11	67.33	0.0379	0.61
208	ENSRNOG00000019162	190.67	112.33	187.11	113.6	0.0441	0.61
209	ENSRNOG00000005063	33.67	19.67	32.62	19.81	0.0341	0.61
210	ENSRNOG00000012442	56.33	28.33	50.85	30.88	0.0431	0.61
211	ENSRNOG00000015290	34.33	20	34.31	20.84	0.0338	0.61
212	ENSRNOG00000058906	24.67	14.33	24.03	14.6	0.0377	0.61
213	ENSRNOG00000006388	76.67	42.33	74.81	45.5	0.0378	0.61
214	ENSRNOG00000036682	57.33	32.33	55.78	33.94	0.0473	0.61
215	ENSRNOG00000008931	41	24.33	40.47	24.66	0.0338	0.61
216	ENSRNOG00000048636	177	100.67	171.91	104.78	0.0483	0.61
217	ENSRNOG00000019470	18	10	17.21	10.5	0.0377	0.61
218	ENSRNOG00000007310	41	24	40.38	24.68	0.0336	0.61
220	ENSRNOG00000016405	91.67	52.67	89.22	54.56	0.0463	0.61
221	ENSRNOG00000001480	1978.33	1167	1920.36	1176.53	0.049	0.61
222	ENSRNOG00000048004	20.67	12	19.64	12.04	0.0399	0.61
223	ENSRNOG00000014465	39.33	22.67	38.32	23.49	0.0472	0.61
224	ENSRNOG00000010833	132.33	78.33	132.37	81.17	0.0375	0.61
225	ENSRNOG00000008062	87.33	51.33	84.58	51.95	0.0412	0.61
226	ENSRNOG00000008065	64	39	62.79	38.57	0.0351	0.61
227	ENSRNOG00000033575	40.33	23.33	39.19	24.11	0.0357	0.62
228	ENSRNOG00000016136	136.67	78.33	131.15	80.8	0.0356	0.62
229	ENSRNOG00000041381	22.67	14	22.15	13.68	0.0354	0.62
230	ENSRNOG00000021609	24	14.67	23.72	14.65	0.0352	0.62
231	ENSRNOG00000053494	391.67	190.33	357.9	221.14	0.0346	0.62
232	ENSRNOG00000019120	343.67	190.33	328.22	202.83	0.0439	0.62
233	ENSRNOG00000008056	848	507.67	846.65	523.73	0.0496	0.62
234	ENSRNOG00000000562	100.67	62	100.3	62.15	0.0347	0.62
235	ENSRNOG00000047578	91.67	53.67	87.45	54.19	0.0345	0.62
236	ENSRNOG00000007084	71.67	43	70.29	43.72	0.0413	0.62
237	ENSRNOG00000012481	207.67	127.33	203.45	126.76	0.0393	0.62
238	ENSRNOG00000033057	53.33	31	52.14	32.49	0.0413	0.62
239	ENSRNOG00000025980	20.67	12.33	20.01	12.47	0.0342	0.62
240	ENSRNOG00000049770	37	21.33	37.13	23.18	0.0378	0.62
241	ENSRNOG00000028730	25.67	16	25.02	15.63	0.0378	0.62
242	ENSRNOG00000042516	76.67	45.33	72.35	45.22	0.0336	0.62
243	ENSRNOG00000012183	155	89	147.59	92.32	0.0467	0.63
244	ENSRNOG00000054620	34.67	20.33	32.9	20.59	0.0345	0.63
245	ENSRNOG00000019680	32	19	31.23	19.57	0.0413	0.63
246	ENSRNOG00000049983	35	21	33.77	21.17	0.0411	0.63
247	ENSRNOG00000015340	229.67	132.33	220.22	138.4	0.0397	0.63
248	ENSRNOG00000046683	18.33	10.67	17.36	10.91	0.0353	0.63
249	ENSRNOG00000009871	252.67	149.33	242.39	152.36	0.0483	0.63
250	ENSRNOG00000010940	266	160	259.81	163.32	0.0467	0.63
251	ENSRNOG00000007925	148	85.67	142.64	89.67	0.0483	0.63
252	ENSRNOG00000057350	24.67	15	24.58	15.47	0.0354	0.63
253	ENSRNOG00000060123	77.33	45.67	75.37	47.43	0.0398	0.63
254	ENSRNOG00000053706	92	54.33	89.61	56.42	0.0474	0.63
255	ENSRNOG00000020985	129.33	78.33	127.83	80.5	0.0367	0.63
256	ENSRNOG00000024885	569.33	347.33	556.27	350.39	0.0451	0.63
257	ENSRNOG00000060246	42.33	25	41.04	25.86	0.0374	0.63
258	ENSRNOG00000016692	3914.67	2347.67	3780.85	2385.29	0.0317	0.63
259	ENSRNOG00000051216	18.67	10.33	17.89	11.29	0.0377	0.63
260	ENSRNOG00000027593	68.67	40.33	66.52	42.09	0.0349	0.63
261	ENSRNOG00000061347	24.67	13.67	24.01	15.2	0.0378	0.63
262	ENSRNOG00000019336	38	21.67	37.31	23.62	0.0348	0.63
263	ENSRNOG00000036484	41.67	25.33	40.02	25.34	0.0401	0.63
264	ENSRNOG00000012828	231.67	141.33	228.62	144.83	0.038	0.63
265	ENSRNOG00000001528	21.67	11.67	20.75	13.15	0.0424	0.63
266	ENSRNOG00000032327	88.33	51.33	83.77	53.2	0.0351	0.64
267	ENSRNOG00000005451	147.33	86.67	140.95	89.52	0.0444	0.64
268	ENSRNOG00000018690	34.33	20.33	32.48	20.63	0.0394	0.64
269	ENSRNOG00000055795	82.67	50.67	81.59	51.86	0.0412	0.64
270	ENSRNOG00000007591	65	37.67	61.91	39.41	0.0342	0.64
271	ENSRNOG00000014083	48.67	30	47.78	30.47	0.0349	0.64
272	ENSRNOG00000003228	1768.33	1073.67	1738.24	1108.77	0.0377	0.64
273	ENSRNOG00000007319	57	35	57.81	36.88	0.0378	0.64
274	ENSRNOG00000022595	17.67	10.67	17.74	11.31	0.0378	0.64
275	ENSRNOG00000007606	49.33	28.67	46.66	29.86	0.0358	0.64
276	ENSRNOG00000007583	4581.33	2779	4417.08	2829.33	0.0273	0.64
277	ENSRNOG00000039891	36.67	21.33	33.69	21.61	0.0472	0.64
278	ENSRNOG00000020407	150.33	91.67	145.29	93.3	0.0414	0.64
279	ENSRNOG00000045574	25.33	15.67	24.46	15.71	0.0336	0.64
280	ENSRNOG00000009437	25.33	15	24.41	15.69	0.041	0.64
281	ENSRNOG00000022483	778.67	471.33	759.13	488.07	0.0483	0.64
282	ENSRNOG00000010883	59.67	33.67	57.44	37.01	0.0349	0.64
283	ENSRNOG00000030170	63	38.33	60.59	39.05	0.0414	0.64
284	ENSRNOG00000014641	3969.67	2494	3914.56	2522.95	0.0377	0.64
285	ENSRNOG00000009635	23.67	14.67	23.31	15.03	0.0354	0.64
286	ENSRNOG00000027799	42.67	26.33	41.85	27.03	0.0389	0.65
287	ENSRNOG00000004640	496	309.33	488.35	315.63	0.0452	0.65
288	ENSRNOG00000050035	43.67	27.33	42.78	27.67	0.0336	0.65
289	ENSRNOG00000046171	174.33	110.67	168.06	108.83	0.0394	0.65
290	ENSRNOG00000001357	68.67	41.67	65.97	42.79	0.037	0.65
291	ENSRNOG00000008572	218.67	135.67	211.94	137.52	0.0439	0.65
292	ENSRNOG00000026913	76	47.33	73.97	48	0.0415	0.65
293	ENSRNOG00000016659	47	29	44.38	28.81	0.0468	0.65
294	ENSRNOG00000019518	175.67	114	172.68	112.09	0.0369	0.65
295	ENSRNOG00000011994	733.33	463.67	716.49	465.15	0.0465	0.65
296	ENSRNOG00000016573	379	230.33	370.97	240.84	0.0478	0.65
297	ENSRNOG00000008757	203.33	125.33	197.18	128.08	0.044	0.65
298	ENSRNOG00000006094	406	227	368.86	239.63	0.0352	0.65
299	ENSRNOG00000014653	88	49.67	81.83	53.2	0.0348	0.65
300	ENSRNOG00000014010	67	41.67	65.34	42.48	0.0346	0.65
301	ENSRNOG00000017780	357.33	214.67	350.61	227.97	0.0439	0.65
302	ENSRNOG00000024651	25	15.33	23.51	15.3	0.0359	0.65
303	ENSRNOG00000017749	62.33	38	61.91	40.35	0.035	0.65
304	ENSRNOG00000012098	265.33	165	253.22	165.06	0.0412	0.65
305	ENSRNOG00000019557	501.33	292	470.88	306.98	0.044	0.65
306	ENSRNOG00000004719	54.67	35	53.94	35.18	0.0347	0.65
307	ENSRNOG00000053015	20.67	13	20.4	13.31	0.0343	0.65
308	ENSRNOG00000014338	186.33	111	177.15	115.61	0.0365	0.65
309	ENSRNOG00000012604	190.33	118	185.49	121.26	0.0474	0.65
310	ENSRNOG00000059507	20.67	12.67	19.73	12.91	0.0441	0.65
311	ENSRNOG00000033038	28.33	17.33	27.8	18.2	0.0358	0.65
312	ENSRNOG00000020634	118.67	72.33	116.31	76.18	0.0413	0.65
313	ENSRNOG00000028993	264.67	170	266.83	174.81	0.0343	0.66
314	ENSRNOG00000020779	118.33	72	113.32	74.27	0.0352	0.66
315	ENSRNOG00000046377	625.33	396	600.46	393.6	0.0451	0.66
316	ENSRNOG00000005765	418.33	265	411.14	269.95	0.0444	0.66
317	ENSRNOG00000021380	398.33	243.67	386.14	253.56	0.0466	0.66
318	ENSRNOG00000027014	33	20	31.06	20.42	0.0346	0.66
319	ENSRNOG00000047450	20	12	18.61	12.24	0.0392	0.66
320	ENSRNOG00000027480	361.67	226	352.34	231.7	0.0462	0.66
321	ENSRNOG00000055295	354	221	346.84	228.15	0.0483	0.66
322	ENSRNOG00000013312	28.67	16.33	27.21	17.92	0.0377	0.66
323	ENSRNOG00000008489	19.67	12.33	19.22	12.66	0.0406	0.66
324	ENSRNOG00000037204	288.67	183	283.85	187.02	0.0452	0.66
325	ENSRNOG00000013526	174.67	108	169.1	111.5	0.0461	0.66
326	ENSRNOG00000001435	87.67	52.33	84.6	55.82	0.0372	0.66
327	ENSRNOG00000018321	23	14	22.24	14.68	0.0348	0.66
328	ENSRNOG00000005857	108.67	70	106.31	70.15	0.0337	0.66
329	ENSRNOG00000015773	46.67	29	45.16	29.85	0.0412	0.66
330	ENSRNOG00000015774	352.67	223.33	344.4	227.7	0.0439	0.66
331	ENSRNOG00000030449	366.33	232.67	360.87	238.89	0.0449	0.66
333	ENSRNOG00000017248	113.67	73.67	110.75	73.46	0.0375	0.66
334	ENSRNOG00000053145	315	190	298.31	197.88	0.0442	0.66
335	ENSRNOG00000059013	61.33	38	59.29	39.42	0.037	0.66
336	ENSRNOG00000000658	7361.67	4675.67	7178.76	4773.32	0.0146	0.66
337	ENSRNOG00000016618	32	20.67	30.96	20.59	0.0351	0.67
338	ENSRNOG00000017843	472	300.33	463.86	308.95	0.0475	0.67
