# Supplementary material for: Antiapoptosis and Antifibrosis Effects of Qishen Granules on Heart Failure Rats via Hippo Pathway
Source: Biomed Res Int. 2019 Dec 12;2019:1642575. doi: 10.1155/2019/1642575 (PMC6930732; doi:10.1155/2019/1642575)
Supplement: Supplementary Materials — Table S1: the upregulated differentially expressed genes between model and sham groups. Table S2: the downregulated differentially expressed genes between model and sham groups. Table S3: the upregulated differentially expressed genes between QSG and model groups. Table S4: the downregulated differentially expressed genes between QSG and model groups. [file 1642575.f1.zip › 1642575.f1/Tables S3.xls]

## Sheet: Tables S3
Table S3 The up-regulated differentially expressed genes between QSG and model groups
	Ensembl.ID	Model.Expression	QS.Expression	TMM.normalized.Model.expression	TMM.normalized.QS.expression	FDR	Fold.Change
1	ENSRNOG00000030478	1008	14883.7	967.35	19441.3	0.000834	20.1
2	ENSRNOG00000043176	20.67	276.67	19.68	276.67	0.00709	14.06
3	ENSRNOG00000030281	1.67	21.33	1.61	21.33	0.0234	13.25
4	ENSRNOG00000034012	3	20	2.57	20.44	0.0457	7.94
5	ENSRNOG00000002450	16.67	80.33	14.65	102.58	0.048	7
6	ENSRNOG00000001203	28.33	103	24.94	129.86	0.0287	5.21
7	ENSRNOG00000012927	14	45.33	12.27	57.24	0.0429	4.67
8	ENSRNOG00000010079	3.33	15	3.35	15.56	0.0449	4.65
9	ENSRNOG00000022896	8.67	26	7.74	33.71	0.048	4.35
10	ENSRNOG00000032401	36.33	110.67	32.89	138.25	0.05	4.2
11	ENSRNOG00000014265	7	24	6.61	25.18	0.0355	3.81
12	ENSRNOG00000021524	9.67	28.67	8.86	32.4	0.0436	3.66
13	ENSRNOG00000001194	19.33	52	18.24	65.06	0.0379	3.57
14	ENSRNOG00000015438	18.33	56.67	17.03	59.83	0.012	3.51
19	ENSRNOG00000013003	9.67	26.67	8.57	29.44	0.0171	3.43
20	ENSRNOG00000009565	1844.33	5230.67	1663.52	5609.44	8.88e-16	3.37
21	ENSRNOG00000020242	21	57	18.64	61.69	0.0345	3.31
22	ENSRNOG00000034228	19.67	51.33	17.92	59.15	0.0422	3.3
23	ENSRNOG00000018453	41.67	99.33	37.31	121.82	0.0481	3.27
24	ENSRNOG00000008439	26.33	61.33	23.54	76.81	0.0446	3.26
25	ENSRNOG00000007955	293.67	742.33	260.18	835.28	0.0285	3.21
26	ENSRNOG00000020650	18.33	51	17.21	54.94	0.0485	3.19
27	ENSRNOG00000003532	7.33	20	6.34	20.22	0.0375	3.19
28	ENSRNOG00000014149	9.67	25	8.71	27.56	0.0332	3.16
29	ENSRNOG00000020251	40	104	36.43	113.73	0.0413	3.12
30	ENSRNOG00000017699	12.33	30.67	10.45	32.47	0.0459	3.11
31	ENSRNOG00000008157	26	60.33	22.14	68.21	0.045	3.08
32	ENSRNOG00000019719	43.33	103.67	39.02	118.64	0.0243	3.04
33	ENSRNOG00000057601	18.67	51	19.17	57.83	0.0485	3.02
34	ENSRNOG00000048644	13	30.33	11.02	32.88	0.0496	2.98
35	ENSRNOG00000013433	10.33	22.67	8.83	25.68	0.0419	2.91
36	ENSRNOG00000049873	24.33	62.67	23.35	67.21	0.0327	2.88
37	ENSRNOG00000035583	6	15.33	5.34	15.38	0.035	2.88
38	ENSRNOG00000029763	4.33	14.67	5.16	14.81	0.0469	2.87
39	ENSRNOG00000010478	25.33	66	23.01	65.99	0.045	2.87
42	ENSRNOG00000020837	212.33	505	200.48	572.88	0.0109	2.86
43	ENSRNOG00000016659	29	68	25.45	72.71	0.0462	2.86
44	ENSRNOG00000017716	140.67	325	129.5	361.28	0.0398	2.79
45	ENSRNOG00000057078	610	1375	566.29	1570.63	0.0404	2.77
46	ENSRNOG00000051470	213	484.67	190.48	523.89	0.00922	2.75
47	ENSRNOG00000004090	7.67	17.67	6.88	18.88	0.046	2.75
48	ENSRNOG00000055197	10	21	8.84	24.12	0.0461	2.73
49	ENSRNOG00000013034	11.67	28	10.75	28.39	0.0381	2.64
50	ENSRNOG00000014117	267.33	612	245.81	643.3	0.011	2.62
51	ENSRNOG00000046772	7	16.33	6.6	17.22	0.0497	2.61
52	ENSRNOG00000024878	21.33	48.67	19.42	50.57	0.0435	2.6
53	ENSRNOG00000026679	974.67	2110.33	891.5	2257.34	4.44e-16	2.53
54	ENSRNOG00000060310	11.33	23.33	10.43	26.01	0.0445	2.49
55	ENSRNOG00000012337	8.33	17.33	8	19.83	0.0407	2.48
56	ENSRNOG00000006617	22	45.67	18.65	46.21	0.0397	2.48
57	ENSRNOG00000018656	16.33	33.33	14.35	35.44	0.042	2.47
58	ENSRNOG00000035568	30	60.67	26.41	65.21	0.0278	2.47
59	ENSRNOG00000057350	15	30.67	13.68	33.74	0.0329	2.47
60	ENSRNOG00000007475	337.33	667.33	310.45	764.7	0.0468	2.46
61	ENSRNOG00000017272	430	855.33	387.93	954.78	5.55e-05	2.46
62	ENSRNOG00000036726	56	109	49.53	120.94	0.0482	2.44
63	ENSRNOG00000052061	13	26.33	12.34	29.75	0.0434	2.41
64	ENSRNOG00000032656	23	48.67	21.05	50.67	0.0392	2.41
65	ENSRNOG00000005154	7.67	13	6.58	15.72	0.0354	2.39
66	ENSRNOG00000008989	681.67	1279.67	590.93	1409.72	0.0354	2.39
67	ENSRNOG00000012436	67	129.67	61.05	144.18	0.0462	2.36
69	ENSRNOG00000060864	11.67	24	10.41	24.54	0.0342	2.36
70	ENSRNOG00000007390	981	1820.67	889.5	2097.16	0.0411	2.36
71	ENSRNOG00000051536	20	39	16.8	39.26	0.0451	2.34
72	ENSRNOG00000028072	16	29.67	14.44	33.28	0.0406	2.31
73	ENSRNOG00000017681	24.67	46.33	23.03	52.97	0.0374	2.3
74	ENSRNOG00000050669	20.67	38.33	19.31	44.37	0.0495	2.3
75	ENSRNOG00000025868	137.33	256.67	119.67	271.2	0.0477	2.27
76	ENSRNOG00000011925	26	47.67	23.27	52.49	0.0365	2.26
77	ENSRNOG00000042516	45.33	88	39.95	90.09	0.0399	2.26
78	ENSRNOG00000021256	21.33	41.67	19.51	43.84	0.0393	2.25
79	ENSRNOG00000022490	49	83	43.31	96.87	0.0454	2.24
80	ENSRNOG00000033517	105	189.67	97.79	218.3	0.0382	2.23
81	ENSRNOG00000027791	94	164	85.33	188.66	0.0382	2.21
82	ENSRNOG00000016182	30	64.33	29.65	65.21	0.0372	2.2
83	ENSRNOG00000016505	18.67	35	16.5	36.02	0.0419	2.18
84	ENSRNOG00000061527	20	38.67	18.66	40.73	0.0382	2.18
85	ENSRNOG00000047102	24	43.33	22.01	47.97	0.0339	2.18
86	ENSRNOG00000034182	18	29.67	15.89	33.93	0.0407	2.14
87	ENSRNOG00000005619	13.67	23.67	12.7	26.99	0.0471	2.12
88	ENSRNOG00000017427	10	19.33	9.33	19.67	0.0339	2.11
90	ENSRNOG00000003984	89	155.67	79.81	167.59	0.0382	2.1
91	ENSRNOG00000059125	138	226.33	122.16	255.35	0.048	2.09
92	ENSRNOG00000029514	36	63.67	31.92	66.57	0.0442	2.09
93	ENSRNOG00000008236	1159	1916.33	1029.95	2142.4	0.0217	2.08
94	ENSRNOG00000043465	33.33	57	30.65	63.71	0.0411	2.08
95	ENSRNOG00000002916	169	275	149.26	309.53	0.0317	2.07
96	ENSRNOG00000036692	65.67	112	57.86	119.42	0.0423	2.06
97	ENSRNOG00000024650	13.33	23.67	12.36	25.38	0.0367	2.05
98	ENSRNOG00000023303	27.33	49.67	26.02	53.3	0.0433	2.05
99	ENSRNOG00000059714	76.67	125.67	71.15	145.66	0.0493	2.05
100	ENSRNOG00000017981	66	112.67	58.84	120	0.0476	2.04
101	ENSRNOG00000001130	10.33	18.33	9.42	19.2	0.0459	2.04
102	ENSRNOG00000010134	1157.33	1892.67	1038.03	2115.2	0.00138	2.04
103	ENSRNOG00000011360	31.67	55.67	29.46	59.91	0.0442	2.03
104	ENSRNOG00000051528	41	67.33	36.57	74.2	0.0436	2.03
105	ENSRNOG00000009686	554	927.67	508.53	1031.86	0.0175	2.03
106	ENSRNOG00000007142	35.33	66.33	33.95	68.78	0.0396	2.03
107	ENSRNOG00000016854	21.67	36	19.34	39.05	0.0393	2.02
108	ENSRNOG00000047565	11	18	10.17	20.49	0.0417	2.02
109	ENSRNOG00000058589	49.33	81.33	45.81	92.11	0.0415	2.01
110	ENSRNOG00000019112	28	49.67	26.94	54.15	0.0468	2.01
111	ENSRNOG00000018018	31.33	52	29.45	59.15	0.0392	2.01
113	ENSRNOG00000021241	20	32.33	17.69	35.4	0.0413	2
114	ENSRNOG00000023465	1401.33	2202.33	1254.49	2503.49	0.0449	2
115	ENSRNOG00000050846	27.33	43.67	24.38	48.61	0.0431	1.99
116	ENSRNOG00000004479	54	85	48.58	96.5	0.0378	1.99
117	ENSRNOG00000000386	173	275.67	153.71	302.85	0.0412	1.97
118	ENSRNOG00000011800	105.33	169.67	95.11	187.36	0.0479	1.97
119	ENSRNOG00000025757	101081	164858	88951.8	175221	0.00498	1.97
120	ENSRNOG00000015290	20	32.33	18.43	36.15	0.0362	1.96
121	ENSRNOG00000041381	14	22.33	12.08	23.52	0.0375	1.95
122	ENSRNOG00000015124	672.33	1139.67	610.85	1187.01	0.0185	1.94
123	ENSRNOG00000038480	47.33	76.33	44.61	86.48	0.0392	1.94
124	ENSRNOG00000000473	830	1310	768.32	1483.07	0.0189	1.93
125	ENSRNOG00000015353	21	38.33	20.73	39.97	0.0381	1.93
126	ENSRNOG00000032994	94.33	150	82.96	159.53	0.0391	1.92
127	ENSRNOG00000018950	15.67	25.67	14.56	27.69	0.0426	1.9
128	ENSRNOG00000007290	2416.33	3755	2126.01	4036.75	0.0198	1.9
129	ENSRNOG00000030154	17.67	28.67	15.71	29.73	0.0469	1.89
131	ENSRNOG00000053201	1085	1663.67	951.29	1798.68	0.0465	1.89
132	ENSRNOG00000042367	10.67	15.33	9.45	17.83	0.0429	1.89
133	ENSRNOG00000020635	76.67	111	70.54	132.36	0.0389	1.88
134	ENSRNOG00000030442	15.67	24	14.99	27.96	0.0376	1.86
135	ENSRNOG00000027593	40.33	60.33	37.21	69.38	0.0341	1.86
136	ENSRNOG00000019473	17.33	29	16.36	30.47	0.0414	1.86
138	ENSRNOG00000032885	40	60.67	36.19	67.35	0.0413	1.86
139	ENSRNOG00000021201	8882.33	13201.3	8016.81	14898.7	0.0193	1.86
140	ENSRNOG00000025371	286.33	426.67	257.49	478.22	0.0265	1.86
141	ENSRNOG00000008706	177.67	262	160.65	298.13	0.0418	1.86
142	ENSRNOG00000026548	645.67	932	574.36	1064.91	0.0304	1.85
143	ENSRNOG00000051304	63.33	96	57.17	105.83	0.044	1.85
144	ENSRNOG00000004921	40.67	65	38.42	71.12	0.0416	1.85
145	ENSRNOG00000001342	23	34	21.26	39.31	0.0401	1.85
146	ENSRNOG00000024986	140.33	216.67	128.96	237.85	0.0492	1.84
147	ENSRNOG00000043866	24391.3	38061.3	24327.7	44793.2	0.0458	1.84
148	ENSRNOG00000009871	149.33	229.33	134.66	247.91	0.047	1.84
149	ENSRNOG00000015599	53	80.67	48.91	89.93	0.0403	1.84
150	ENSRNOG00000016136	78.33	119.33	71.42	131.22	0.0445	1.84
151	ENSRNOG00000031244	12.33	17	10.96	20.14	0.0459	1.84
152	ENSRNOG00000011000	79.67	123	69.49	127.61	0.0398	1.84
153	ENSRNOG00000042960	683	984	614.29	1126.11	0.0248	1.83
154	ENSRNOG00000006076	200	314.67	181.93	332.63	0.0335	1.83
155	ENSRNOG00000014409	257.67	418	256.01	466.65	0.0361	1.82
156	ENSRNOG00000050419	38	58.67	33.5	60.97	0.0402	1.82
157	ENSRNOG00000013330	23.67	38.33	21.62	39.21	0.0463	1.81
158	ENSRNOG00000052080	19.67	31.67	18.13	32.79	0.0464	1.81
159	ENSRNOG00000020606	46	67.33	42.04	76.03	0.0404	1.81
160	ENSRNOG00000020164	51.33	80.33	47.91	86.6	0.0483	1.81
161	ENSRNOG00000013090	488	720.33	450.98	812.69	0.0437	1.8
162	ENSRNOG00000060057	19.67	28	16.67	30.02	0.0413	1.8
163	ENSRNOG00000061921	39.33	57.67	36.04	64.9	0.0409	1.8
164	ENSRNOG00000000486	16	24.33	15.06	27.11	0.0397	1.8
165	ENSRNOG00000013312	16.33	28	15.85	28.52	0.045	1.8
166	ENSRNOG00000011815	423.33	610	379.06	681.71	0.0382	1.8
167	ENSRNOG00000018505	566	897.33	529.07	949.91	0.0444	1.8
168	ENSRNOG00000009144	73	107.33	64.84	116.38	0.0434	1.79
169	ENSRNOG00000057116	68.67	98.33	61.14	109.67	0.0496	1.79
170	ENSRNOG00000025198	23	33	21.14	37.88	0.04	1.79
171	ENSRNOG00000061610	13	17.33	11.25	20.15	0.0459	1.79
172	ENSRNOG00000054620	20.33	31	18.19	32.57	0.0359	1.79
173	ENSRNOG00000020546	922.67	1340.67	841.13	1502.71	0.0402	1.79
174	ENSRNOG00000032327	51.33	72	47.04	83.98	0.0357	1.79
175	ENSRNOG00000051541	15.33	24	13.69	24.42	0.0414	1.78
176	ENSRNOG00000003171	14	24.67	14.36	25.62	0.0413	1.78
177	ENSRNOG00000011669	62.33	89.67	54.97	97.74	0.0401	1.78
178	ENSRNOG00000061850	42	62.33	37.26	66.11	0.0404	1.77
179	ENSRNOG00000004697	70	103.33	61.31	108.54	0.0341	1.77
180	ENSRNOG00000032924	65.67	92	59.51	105.3	0.034	1.77
181	ENSRNOG00000037298	185.33	266	167.29	295.89	0.0461	1.77
182	ENSRNOG00000001273	103.33	149.67	96.05	169.68	0.0394	1.77
183	ENSRNOG00000018690	20.33	28.33	18.23	32.17	0.0382	1.76
184	ENSRNOG00000020552	17.33	26	15.73	27.7	0.0413	1.76
185	ENSRNOG00000045998	185	264.33	171.73	302.05	0.0455	1.76
186	ENSRNOG00000013683	1148.33	1625	1039.76	1823.79	0.0401	1.75
187	ENSRNOG00000013011	1287.33	1869.67	1160.31	2030.03	1.59e-07	1.75
188	ENSRNOG00000031590	13.67	18.67	12.22	21.37	0.0357	1.75
189	ENSRNOG00000015051	31.33	46	28.89	50.5	0.0417	1.75
190	ENSRNOG00000005659	30	44.33	25.97	45.28	0.048	1.74
191	ENSRNOG00000006841	16	22.33	14.3	24.8	0.0394	1.73
192	ENSRNOG00000019661	34.67	60	35.41	61.4	0.0495	1.73
193	ENSRNOG00000010940	160	231.67	144.35	249.8	0.0469	1.73
194	ENSRNOG00000058906	14.33	21.67	12.9	22.32	0.0461	1.73
195	ENSRNOG00000029145	2958.67	4297.33	2749.23	4753.54	0.0296	1.73
196	ENSRNOG00000014508	684.67	976.67	622.37	1075.2	0.0251	1.73
197	ENSRNOG00000033575	23.33	33	21.31	36.81	0.0402	1.73
198	ENSRNOG00000006119	22.67	31.67	20.13	34.74	0.0382	1.73
199	ENSRNOG00000028238	2973	4126.33	2666.29	4599.68	0.01	1.73
200	ENSRNOG00000019342	353.33	477.33	319.95	550.66	0.0448	1.72
201	ENSRNOG00000059073	16.67	24.33	15.01	25.83	0.0401	1.72
202	ENSRNOG00000052634	172.67	243.67	153.85	263.63	0.0445	1.71
203	ENSRNOG00000053893	19	27	17.33	29.66	0.0375	1.71
204	ENSRNOG00000022331	23	32.33	20.65	35.29	0.0454	1.71
205	ENSRNOG00000060511	3419.67	4767.67	3080.82	5262.76	0.000128	1.71
206	ENSRNOG00000014791	454.67	661.67	408.56	697.22	0.0459	1.71
207	ENSRNOG00000033100	57	79	53.52	91.18	0.0391	1.7
208	ENSRNOG00000004476	31	44.33	27.68	47.13	0.042	1.7
209	ENSRNOG00000014010	41.67	57.67	37.55	63.84	0.0368	1.7
210	ENSRNOG00000030410	81	107.67	70.23	118.54	0.0382	1.69
211	ENSRNOG00000029805	23	33.33	20.99	35.32	0.0383	1.68
212	ENSRNOG00000010721	25	34.33	22.73	38.25	0.041	1.68
213	ENSRNOG00000030644	233863	325880	215956	362879	0.035	1.68
214	ENSRNOG00000018286	97.67	136	88.6	148.74	0.0364	1.68
215	ENSRNOG00000059142	41.67	59.67	38.14	64.01	0.0358	1.68
216	ENSRNOG00000010633	6634.33	9125.33	5905.13	9895.15	9.88e-08	1.68
217	ENSRNOG00000030238	1511.33	2178.33	1414.16	2368.62	0.0247	1.67
218	ENSRNOG00000055499	19.67	25.33	16.67	27.9	0.0468	1.67
219	ENSRNOG00000020467	197.33	282.67	183.07	306.21	0.0252	1.67
220	ENSRNOG00000028690	30	42	28.7	47.91	0.0393	1.67
221	ENSRNOG00000060851	17	22.33	15.37	25.66	0.0386	1.67
222	ENSRNOG00000012757	40	57.33	36.19	60.4	0.0377	1.67
223	ENSRNOG00000023122	713.67	917	629.38	1048.94	0.0462	1.67
224	ENSRNOG00000032542	16.33	22.67	15.74	26.21	0.045	1.66
225	ENSRNOG00000027014	20	28	18.04	30.01	0.042	1.66
226	ENSRNOG00000031979	384779	525296	355837	591648	0.0151	1.66
227	ENSRNOG00000057082	180.33	247	158.98	264.3	0.0396	1.66
228	ENSRNOG00000003209	210.33	285	186.35	309.32	0.0463	1.66
229	ENSRNOG00000031033	302467	417709	281176	466535	0.0296	1.66
230	ENSRNOG00000031706	36.33	49.33	33.37	55.33	0.0383	1.66
231	ENSRNOG00000014080	19.33	27.33	17.89	29.67	0.0496	1.66
232	ENSRNOG00000005630	25	33.67	22.55	37.37	0.0378	1.66
233	ENSRNOG00000018770	89	120.67	81.33	134.79	0.0413	1.66
234	ENSRNOG00000032630	487.67	659.67	447.11	740.67	0.0268	1.66
235	ENSRNOG00000010241	48.33	66.67	44.51	73.64	0.0486	1.65
236	ENSRNOG00000015774	223.33	305.67	201.25	332.68	0.0385	1.65
237	ENSRNOG00000008489	12.33	16	11.19	18.5	0.0461	1.65
238	ENSRNOG00000008572	135.67	178.67	121.53	199.94	0.0398	1.65
239	ENSRNOG00000021200	1557.67	2068	1398.01	2297.6	0.033	1.64
240	ENSRNOG00000002695	329.33	440.67	295.31	485.15	0.025	1.64
241	ENSRNOG00000013793	539.67	701.33	481.74	791.18	0.0481	1.64
242	ENSRNOG00000014215	937	1227	827.56	1357.95	0.0471	1.64
243	ENSRNOG00000015150	1142.67	1589.33	1066.72	1749.61	0.0212	1.64
244	ENSRNOG00000008027	3396	4673	3043.79	4990.47	0.0363	1.64
245	ENSRNOG00000033261	179	224.33	156.43	256.46	0.0377	1.64
246	ENSRNOG00000011383	2143.33	2849.67	1939.41	3177.51	0.0173	1.64
247	ENSRNOG00000059386	207	276	188.17	308.06	0.0463	1.64
248	ENSRNOG00000007387	824	1138.33	748.27	1224.7	0.0316	1.64
249	ENSRNOG00000049900	433.67	596	407.8	667.14	0.0389	1.64
250	ENSRNOG00000020669	27	35.33	23.73	38.81	0.0399	1.64
251	ENSRNOG00000055795	50.67	67.33	45.84	74.96	0.0371	1.64
252	ENSRNOG00000021174	3409	4509	3126.04	5103.95	0.0258	1.63
253	ENSRNOG00000061857	53.67	70	49.5	80.61	0.0352	1.63
254	ENSRNOG00000011794	414.67	534.67	371.49	604.97	0.0434	1.63
255	ENSRNOG00000018943	28242.3	36757.7	25548.5	41559.1	0.0265	1.63
256	ENSRNOG00000002224	306.67	419.33	277.87	451.76	0.0476	1.63
257	ENSRNOG00000016070	32.33	44.67	29.37	47.68	0.0397	1.62
258	ENSRNOG00000059479	82.33	120	74.71	121.24	0.0412	1.62
259	ENSRNOG00000046349	17.67	24.33	16.53	26.8	0.038	1.62
260	ENSRNOG00000012458	134.33	162.33	115.17	186.59	0.0457	1.62
261	ENSRNOG00000042962	329.67	436.67	296.28	479.44	0.0243	1.62
262	ENSRNOG00000015003	30.67	40.33	26.92	43.48	0.0456	1.62
263	ENSRNOG00000005556	69.33	89.33	63.06	101.77	0.04	1.61
264	ENSRNOG00000001480	1167	1553	1039.71	1677.65	0.0117	1.61
265	ENSRNOG00000054609	214.67	281.67	192.09	309.95	0.0467	1.61
266	ENSRNOG00000018114	5322.67	6957.33	4765.3	7683.97	0.00023	1.61
267	ENSRNOG00000033734	115424	148375	102556	165345	0.0303	1.61
268	ENSRNOG00000018944	340.33	443.67	306.24	492.73	0.0391	1.61
269	ENSRNOG00000060293	2477	3242	2267.69	3647.63	0.0466	1.61
270	ENSRNOG00000004534	21.33	28.33	19.34	31.09	0.0365	1.61
271	ENSRNOG00000000407	63	84	57.29	92.09	0.042	1.61
272	ENSRNOG00000059857	297.67	426	276.69	444.34	0.0365	1.61
273	ENSRNOG00000058372	65	86.67	57.49	92.27	0.0374	1.6
274	ENSRNOG00000007454	88.67	113.33	80.06	128.46	0.0381	1.6
275	ENSRNOG00000007250	51.33	71.67	46.8	75	0.0461	1.6
276	ENSRNOG00000019527	17.33	22	15.49	24.79	0.0383	1.6
277	ENSRNOG00000012410	263.67	333.67	237.93	380.27	0.0391	1.6
278	ENSRNOG00000056941	34	44.33	30.71	49.06	0.0339	1.6
279	ENSRNOG00000029042	31591.7	40958.7	28618.6	45667.3	4.34e-05	1.6
280	ENSRNOG00000024967	2084.67	2677.67	1880.1	2999.18	0.0461	1.6
281	ENSRNOG00000051238	19.33	24.33	17.07	27.22	0.0471	1.6
282	ENSRNOG00000054871	108.67	140.33	97.72	155.88	0.0403	1.6
283	ENSRNOG00000006913	105.67	136.67	94.91	151.37	0.0419	1.59
284	ENSRNOG00000017538	202	253.33	176.19	280.89	0.0414	1.59
285	ENSRNOG00000025179	61	78.67	57.28	91.27	0.0472	1.59
286	ENSRNOG00000015283	56.67	79	50.81	80.89	0.0467	1.59
287	ENSRNOG00000057867	20.67	26	18.37	29.2	0.0468	1.59
288	ENSRNOG00000011962	94.67	123.33	84.41	134.11	0.0388	1.59
289	ENSRNOG00000005964	65	98	61.98	98.45	0.0495	1.59
290	ENSRNOG00000008839	83	107.67	76.61	121.65	0.0388	1.59
291	ENSRNOG00000009845	9052.33	11483.7	7976.69	12661.9	0.00703	1.59
292	ENSRNOG00000052298	13.67	20	13.08	20.76	0.0465	1.59
293	ENSRNOG00000000542	16	20.33	13.97	22.18	0.0428	1.59
294	ENSRNOG00000015260	31.67	44	30.78	48.84	0.0421	1.59
295	ENSRNOG00000033615	94451.7	123075	86865	137581	0.0295	1.58
296	ENSRNOG00000000412	34	44	30.5	48.3	0.0399	1.58
297	ENSRNOG00000003745	126.67	172.67	113.64	179.83	0.0459	1.58
298	ENSRNOG00000059878	18.33	23.33	16.44	26.01	0.0353	1.58
299	ENSRNOG00000007610	231.67	319.67	213.53	337.67	0.0422	1.58
300	ENSRNOG00000046763	2482	3206	2253.38	3558.77	0.00139	1.58
301	ENSRNOG00000061099	35.67	45	32.38	51.12	0.0367	1.58
302	ENSRNOG00000016692	2347.67	3049.67	2108.11	3327.72	0.049	1.58
303	ENSRNOG00000021403	1873.67	2456.67	1721.71	2716.35	0.00838	1.58
304	ENSRNOG00000004246	589.67	747	524.64	827.69	0.0278	1.58
305	ENSRNOG00000005158	59.67	76.67	53.48	84.35	0.0402	1.58
306	ENSRNOG00000048152	514.67	675	460.99	726.98	0.0449	1.58
307	ENSRNOG00000012290	47.33	58	43.12	67.92	0.0443	1.58
308	ENSRNOG00000005386	1046.67	1360	956	1505.79	0.0217	1.58
309	ENSRNOG00000008664	33.33	43.67	31.22	49.14	0.0472	1.57
310	ENSRNOG00000048495	156.67	197.67	141.97	223.42	0.0338	1.57
311	ENSRNOG00000048874	35.33	44.33	31.54	49.6	0.0471	1.57
312	ENSRNOG00000009715	1538.67	1979.33	1370.08	2152.95	0.0117	1.57
313	ENSRNOG00000025895	2796.33	3575	2528.94	3972.74	0.00281	1.57
314	ENSRNOG00000055328	230.67	288.67	198.37	311.55	0.0343	1.57
315	ENSRNOG00000018044	18830.3	23367.3	16651.8	26134	0.0225	1.57
316	ENSRNOG00000035620	25	33.67	22.6	35.44	0.0355	1.57
317	ENSRNOG00000007316	4768	6050	4259.86	6678.74	0.0018	1.57
318	ENSRNOG00000019518	114	145.67	99.01	155.21	0.036	1.57
319	ENSRNOG00000057666	34	42.33	30.37	47.6	0.0441	1.57
320	ENSRNOG00000020951	211.67	303.67	195.37	305.93	0.0369	1.57
321	ENSRNOG00000029333	391	494.33	349.61	547.46	0.0392	1.57
322	ENSRNOG00000007490	22.33	30.67	20.66	32.35	0.0377	1.57
323	ENSRNOG00000033346	20	23.33	16.76	26.22	0.0493	1.56
324	ENSRNOG00000048915	3943.67	5204.67	3671.41	5740.99	0.0341	1.56
325	ENSRNOG00000016470	4479	5664.33	3961.89	6195.02	0.0157	1.56
327	ENSRNOG00000053460	145.67	189.33	134.29	209.92	0.0417	1.56
328	ENSRNOG00000026982	167.67	227	154.71	241.71	0.0415	1.56
329	ENSRNOG00000012314	87	110	80.26	125.36	0.0383	1.56
330	ENSRNOG00000004282	190.67	238.33	173.14	270.14	0.0376	1.56
331	ENSRNOG00000046377	396	503.33	347.73	540.83	0.0381	1.56
332	ENSRNOG00000020860	28.33	37.33	25.9	40.27	0.0419	1.55
333	ENSRNOG00000059168	52	64	47.08	73.15	0.0471	1.55
334	ENSRNOG00000005857	70	88.33	61.99	96.29	0.0381	1.55
335	ENSRNOG00000057713	894.33	1123	806.03	1251.24	0.0489	1.55
336	ENSRNOG00000005975	1104.67	1485.67	1024.83	1586.74	0.0402	1.55
337	ENSRNOG00000007433	46.67	62.33	44.02	68.15	0.0374	1.55
338	ENSRNOG00000056575	25.67	33.67	24.01	37.15	0.039	1.55
339	ENSRNOG00000017332	102	128	93.08	143.91	0.0377	1.55
340	ENSRNOG00000021056	51	67.67	46.2	71.41	0.0443	1.55
341	ENSRNOG00000007230	695	853.67	624.35	964.19	0.0459	1.54
342	ENSRNOG00000029798	18	22.67	16.28	25.13	0.0381	1.54
343	ENSRNOG00000056257	17.33	22.67	16.29	25.14	0.0421	1.54
344	ENSRNOG00000012879	13979.3	17503.7	12649.7	19515	0.0115	1.54
345	ENSRNOG00000029707	15228.7	19933	14129.4	21797.7	0	1.54
346	ENSRNOG00000033343	19	23.67	17.38	26.77	0.0457	1.54
347	ENSRNOG00000005670	73.67	93	65.34	100.63	0.0456	1.54
348	ENSRNOG00000004317	34.67	43	30.99	47.74	0.0353	1.54
349	ENSRNOG00000017093	706.67	914	648.53	998.75	0.00543	1.54
350	ENSRNOG00000004011	287.67	377	261.99	403.46	0.0399	1.54
351	ENSRNOG00000054508	87	110.33	78.02	120.14	0.0364	1.54
352	ENSRNOG00000015956	21.67	27	19.34	29.77	0.0467	1.54
353	ENSRNOG00000051701	83.67	106.33	75.22	115.7	0.0401	1.54
354	ENSRNOG00000034200	183.67	241	165.23	254.11	0.0342	1.54
355	ENSRNOG00000001347	371.33	480	327.8	503.98	0.0401	1.54
356	ENSRNOG00000043033	119.33	147.33	106.58	163.7	0.0343	1.54
357	ENSRNOG00000007030	18.67	24	16.54	25.4	0.0481	1.54
358	ENSRNOG00000021005	766.33	963	696.01	1068.59	0.0488	1.54
359	ENSRNOG00000004857	278.33	345.67	245.09	375.81	0.0496	1.53
360	ENSRNOG00000009448	222	288	199.12	305.31	0.0456	1.53
361	ENSRNOG00000003279	38	47	33.85	51.82	0.038	1.53
362	ENSRNOG00000005215	85.33	111.33	79.33	121.43	0.0403	1.53
363	ENSRNOG00000031766	409748	512694	371207	567984	0.0322	1.53
364	ENSRNOG00000013059	71.67	88	64.42	98.53	0.0402	1.53
365	ENSRNOG00000045785	80.33	103.33	74.25	113.57	0.0412	1.53
366	ENSRNOG00000030058	25	31	22.64	34.61	0.0459	1.53
367	ENSRNOG00000018766	17.67	21	15.78	24.12	0.0435	1.53
368	ENSRNOG00000020634	72.33	92.67	67.36	102.96	0.0374	1.53
369	ENSRNOG00000030170	38.33	48.33	34.51	52.72	0.0383	1.53
370	ENSRNOG00000031167	102	135	94.41	144.12	0.0392	1.53
371	ENSRNOG00000003872	74.33	98	67.21	102.58	0.0399	1.53
372	ENSRNOG00000013437	24.67	32.67	23.01	35.09	0.0453	1.53
373	ENSRNOG00000021735	3487.67	4322	3136.94	4782.32	0.00458	1.52
374	ENSRNOG00000028993	170	198.67	154.52	235.48	0.0464	1.52
375	ENSRNOG00000009155	2966.67	3647.67	2678.36	4078.93	0.0406	1.52
376	ENSRNOG00000007545	107	141.33	105.11	160.04	0.042	1.52
377	ENSRNOG00000023008	179.67	231	164.42	250.17	0.0412	1.52
378	ENSRNOG00000023338	331.67	412.67	299.99	456.19	0.0459	1.52
379	ENSRNOG00000007989	40.67	52.67	37.59	57.14	0.0429	1.52
380	ENSRNOG00000037435	495	670.33	456.99	694.35	0.0455	1.52
381	ENSRNOG00000004893	281	350.67	252.96	384.27	0.0419	1.52
382	ENSRNOG00000033057	31	38.67	28.73	43.64	0.0463	1.52
383	ENSRNOG00000030763	288.33	369.67	267.24	405.9	0.0368	1.52
384	ENSRNOG00000053362	1853	2327.67	1686.48	2559.71	0.00913	1.52
385	ENSRNOG00000017248	73.67	90	64.9	98.48	0.0393	1.52
386	ENSRNOG00000006744	307.67	378.67	276.71	419.89	0.0407	1.52
387	ENSRNOG00000024924	502.33	634.33	451.06	684.29	0.0413	1.52
388	ENSRNOG00000055078	548	656.33	481.36	730.06	0.0391	1.52
389	ENSRNOG00000020288	2126.33	2618	1903.04	2885.56	0.0122	1.52
390	ENSRNOG00000002338	356.33	439.33	313.31	474.99	0.0397	1.52
391	ENSRNOG00000021478	334.33	389.33	301.57	457.14	0.0388	1.52
392	ENSRNOG00000022144	59	73.33	53.79	81.46	0.04	1.51
393	ENSRNOG00000010071	26.33	32	23.37	35.39	0.0458	1.51
394	ENSRNOG00000013737	96.33	127	90.35	136.81	0.0401	1.51
395	ENSRNOG00000024689	628	827.67	587.48	889.54	0.0432	1.51
396	ENSRNOG00000052707	203	274	186.11	281.79	0.037	1.51
397	ENSRNOG00000020659	1094.67	1384	1018.84	1542.49	0.028	1.51
398	ENSRNOG00000010799	128	160	113.99	172.51	0.0379	1.51
399	ENSRNOG00000005811	41.33	53	38.41	58.01	0.0374	1.51
400	ENSRNOG00000004774	56	67.33	50.26	75.92	0.0372	1.51
401	ENSRNOG00000017210	250.33	319.33	227.35	343.3	0.047	1.51
402	ENSRNOG00000051880	45.33	53.67	41.07	62	0.0431	1.51
403	ENSRNOG00000018415	650.67	808.67	596.12	899.89	0.0414	1.51
404	ENSRNOG00000055157	20	26.33	18.93	28.57	0.0462	1.51
405	ENSRNOG00000001357	41.67	51.33	37.82	57.1	0.0389	1.51
406	ENSRNOG00000011648	6108	7400.67	5563.4	8396.72	0.0409	1.51
407	ENSRNOG00000046533	526.33	647	475.24	716.62	0.0461	1.51
408	ENSRNOG00000005587	4285.67	5259.67	3864.78	5823.71	0.0121	1.51
409	ENSRNOG00000021213	1355	1673.67	1221.32	1839.97	0.0254	1.51
410	ENSRNOG00000021314	1049	1289	936.95	1411.54	0.0459	1.51
411	ENSRNOG00000050997	401	497.67	364.34	548.48	0.0405	1.51
412	ENSRNOG00000013236	491.67	631.67	444.84	669.59	0.0481	1.51
413	ENSRNOG00000017945	67.67	84.67	63.41	95.41	0.0381	1.5
414	ENSRNOG00000055547	52.67	69.33	49.03	73.72	0.0371	1.5
415	ENSRNOG00000057988	5814.67	7189.33	5191.31	7804.58	0.00244	1.5
416	ENSRNOG00000052518	217.67	266.67	195.89	294.48	0.0496	1.5
417	ENSRNOG00000025160	26.67	33.33	24.44	36.72	0.0358	1.5
418	ENSRNOG00000019203	135.67	172.67	127.04	190.87	0.0377	1.5
419	ENSRNOG00000015357	81	96.67	72.11	108.33	0.0355	1.5
420	ENSRNOG00000052004	165	198.67	149.56	224.53	0.0374	1.5
421	ENSRNOG00000057054	18	22.67	16.26	24.39	0.0437	1.5
