# Supplementary material for: Antiapoptosis and Antifibrosis Effects of Qishen Granules on Heart Failure Rats via Hippo Pathway
Source: Biomed Res Int. 2019 Dec 12;2019:1642575. doi: 10.1155/2019/1642575 (PMC6930732; doi:10.1155/2019/1642575)
Supplement: Supplementary Materials — Table S1: the upregulated differentially expressed genes between model and sham groups. Table S2: the downregulated differentially expressed genes between model and sham groups. Table S3: the upregulated differentially expressed genes between QSG and model groups. Table S4: the downregulated differentially expressed genes between QSG and model groups. [file 1642575.f1.zip › 1642575.f1/Tables S4.xls]

## Sheet: Tables S4
Table S4 The down-regulated differentially expressed genes between QSG and model groups
Ensembl.ID	Model.Expression	QS.Expression	TMM.normalized.Model.expression	TMM.normalized.QS.expression	FDR	Fold.Change
ENSRNOG00000058560	1047	0.33	916.03	0.77	0	0
ENSRNOG00000032002	76.33	0	66.97	0.55	1.14e-14	0.01
ENSRNOG00000012238	143.33	0.67	126.56	1.05	3.65e-05	0.01
ENSRNOG00000033609	98	1.33	89.39	1.54	0	0.02
ENSRNOG00000002158	66.67	1	61.13	1.27	0	0.02
ENSRNOG00000010392	78.33	1.67	81.51	1.88	0.0243	0.02
ENSRNOG00000028992	103.67	2	94.94	2.31	7.21e-10	0.02
ENSRNOG00000020622	50	1	51.1	1.27	0	0.02
ENSRNOG00000003899	20.67	0.67	23.05	0.88	0.0186	0.04
ENSRNOG00000002548	26	0.67	25.73	1.05	0.00101	0.04
ENSRNOG00000009450	1378.67	53.67	1235.59	56.09	2.33e-15	0.05
ENSRNOG00000059770	39.33	1.33	34.04	1.55	0.0177	0.05
ENSRNOG00000048472	245.67	10.67	229.61	11.04	3.46e-11	0.05
ENSRNOG00000012742	113.67	5.33	101.51	5.41	0	0.05
ENSRNOG00000013907	31.33	1.33	28.92	1.6	2.76e-05	0.06
ENSRNOG00000021619	11.33	0.33	12.72	0.72	0.0343	0.06
ENSRNOG00000012920	41.67	2	35.8	2.1	0.0485	0.06
ENSRNOG00000042547	21.67	1.33	23.91	1.43	0.0335	0.06
ENSRNOG00000040350	63.33	3.33	63.33	3.96	0.0169	0.06
ENSRNOG00000046834	426.33	26.67	459.91	29.75	0.025	0.06
ENSRNOG00000023148	158	10.33	147.34	10.5	0.0194	0.07
ENSRNOG00000051399	48.33	3	42.76	3.2	0.0255	0.07
ENSRNOG00000030285	110	7.67	94.01	7.74	0.027	0.08
ENSRNOG00000018290	46	3.33	40.2	3.53	0	0.09
ENSRNOG00000025498	26.33	2.33	29.61	2.64	0.0354	0.09
ENSRNOG00000013262	192	16.33	188.88	17.76	0.0115	0.09
ENSRNOG00000021243	514.67	45.67	489.89	46.94	8.88e-15	0.1
ENSRNOG00000001959	1779	135.67	1558.2	153.16	0	0.1
ENSRNOG00000057527	323.33	29.67	297.29	30.17	5.77e-15	0.1
ENSRNOG00000019050	1095	88.67	970.87	100.44	0	0.1
ENSRNOG00000009531	90.33	8	80.23	8.5	0.0496	0.11
ENSRNOG00000017414	4133.67	363.33	3823.65	407.6	0	0.11
ENSRNOG00000018570	20	2	20.7	2.21	0.0488	0.11
ENSRNOG00000008045	102.33	9.33	93.98	10.04	0.0103	0.11
ENSRNOG00000011557	156	13.67	138.2	15	0.000255	0.11
ENSRNOG00000011483	238.33	22	219.85	23.93	0	0.11
ENSRNOG00000033803	30.67	2.67	27.5	3.08	0.0032	0.11
ENSRNOG00000001976	129	11	112.2	12.66	0.000826	0.11
ENSRNOG00000000443	1357.67	159	1450.88	168.56	0.0223	0.12
ENSRNOG00000013166	55	6.33	58.25	6.84	0.0451	0.12
ENSRNOG00000016957	20.33	2.33	22.31	2.64	0.0499	0.12
ENSRNOG00000009332	108.67	10.67	97.92	11.69	0.0263	0.12
ENSRNOG00000059207	46.33	5	42.94	5.19	0.0167	0.12
ENSRNOG00000024382	59	6	55.18	6.72	0.000653	0.12
ENSRNOG00000014233	36	4.67	39.8	4.86	0.0357	0.12
ENSRNOG00000033444	20.33	2.33	19.75	2.54	0.0337	0.13
ENSRNOG00000037198	1213.67	131	1109.94	143.35	2.71e-14	0.13
ENSRNOG00000057092	3685	392	3262.42	424.56	0	0.13
ENSRNOG00000009342	43	5	38.73	5.19	0.0134	0.13
ENSRNOG00000001984	59	7.33	54.89	7.62	0.0335	0.14
ENSRNOG00000021217	24	3	22.23	3.09	0.0158	0.14
ENSRNOG00000019445	480.33	71.67	530.58	73.92	0.0395	0.14
ENSRNOG00000023686	137.67	20.67	152.26	21.33	0.0335	0.14
ENSRNOG00000006314	67.67	8.33	61.5	8.72	0.00689	0.14
ENSRNOG00000017676	190.33	26.67	195.01	28.15	0.0172	0.14
ENSRNOG00000016164	29	3.67	27.97	4.08	0.0131	0.15
ENSRNOG00000047967	16.33	2.33	17.34	2.54	0.0435	0.15
ENSRNOG00000021555	26.67	3.33	23.96	3.53	0.000562	0.15
ENSRNOG00000049282	248.33	30	220.25	32.54	1.44e-14	0.15
ENSRNOG00000050675	226.33	30	230.43	34.26	0.0132	0.15
ENSRNOG00000029668	74.67	11.67	82.05	12.25	0.0448	0.15
ENSRNOG00000003217	3274.33	432	3075.54	465.1	0	0.15
ENSRNOG00000042990	51.33	6.67	45.65	7.07	0.00148	0.15
ENSRNOG00000026605	4605	587.67	4234.8	657.45	0	0.16
ENSRNOG00000009589	56.67	7.67	55.71	8.7	0.0165	0.16
ENSRNOG00000028768	256	32.33	224.17	35.4	0.0037	0.16
ENSRNOG00000001963	2277	283.67	2024.01	319.95	0	0.16
ENSRNOG00000001187	235.67	29.67	212.05	33.71	0.000148	0.16
ENSRNOG00000051235	76	11.33	74.14	11.92	0.0122	0.16
ENSRNOG00000038957	124	15.67	109.94	17.95	0.0406	0.16
ENSRNOG00000007810	22.33	3.67	23.49	3.86	0.0393	0.16
ENSRNOG00000036484	25.33	3.33	22.39	3.75	0.0415	0.17
ENSRNOG00000009564	16.67	2.33	17.32	2.92	0.0297	0.17
ENSRNOG00000016437	29	5.33	32.01	5.42	0.028	0.17
ENSRNOG00000011180	319.33	47.67	296.87	50.77	1.1e-14	0.17
ENSRNOG00000022256	94	13.67	85.11	14.57	0.0291	0.17
ENSRNOG00000048053	83.67	11.67	73.85	12.79	0.0247	0.17
ENSRNOG00000008759	49.67	7.67	46.8	8.17	0.0277	0.17
ENSRNOG00000011824	116.67	17.33	105.48	18.43	0.0167	0.17
ENSRNOG00000030729	2077.67	341	2102.03	367.33	0.000158	0.17
ENSRNOG00000012531	19	3	19.72	3.52	0.0296	0.18
ENSRNOG00000005277	35.33	5.67	36.93	6.6	0.0336	0.18
ENSRNOG00000038999	932.67	134	810.65	149.78	0.0196	0.18
ENSRNOG00000030920	20	3.33	21.42	3.96	0.0284	0.18
ENSRNOG00000057855	32.67	5.67	31.65	5.85	0.0469	0.18
ENSRNOG00000020129	25.33	5	27.78	5.19	0.0283	0.19
ENSRNOG00000043451	345.67	62.33	334.58	63.87	0.0213	0.19
ENSRNOG00000002217	201	36.67	203.01	38.86	0.0178	0.19
ENSRNOG00000003094	37	6.67	37.8	7.28	0.0349	0.19
ENSRNOG00000024899	90.33	16.33	89.43	17.65	0.035	0.2
ENSRNOG00000016581	97.67	17.67	95	18.76	0.0135	0.2
ENSRNOG00000019183	122.33	24	123.74	24.53	0.0269	0.2
ENSRNOG00000012094	804.67	160.67	813.61	162.72	0.0171	0.2
ENSRNOG00000028274	184.67	37	196.01	39.73	0.0347	0.2
ENSRNOG00000027380	83.33	17.67	92	18.66	0.0218	0.2
ENSRNOG00000054042	15.33	2.67	15.7	3.19	0.0331	0.2
ENSRNOG00000031834	63.67	13.67	69.83	14.25	0.0304	0.2
ENSRNOG00000000700	95.67	18.67	94.2	19.32	0.032	0.21
ENSRNOG00000017773	24	4.33	21.51	4.42	0.0346	0.21
ENSRNOG00000017118	17.33	3.67	18.75	3.86	0.0265	0.21
ENSRNOG00000037853	172.67	33	164.91	34.55	0.00172	0.21
ENSRNOG00000022839	883.67	144.33	785.18	164.89	2.35e-05	0.21
ENSRNOG00000021802	689	117.33	629.82	133.07	0.000252	0.21
ENSRNOG00000020952	42.33	9.33	45.57	9.72	0.0323	0.21
ENSRNOG00000039931	126.67	28	138.1	29.48	0.0359	0.21
ENSRNOG00000014118	46	7.67	41.86	9.03	0.0309	0.22
ENSRNOG00000047085	22.67	5	23.87	5.2	0.0345	0.22
ENSRNOG00000001369	484.67	88	448.64	98.52	0.00223	0.22
ENSRNOG00000021015	263	50	241.16	53.2	0.00105	0.22
ENSRNOG00000009779	48.33	11	51.34	11.38	0.0285	0.22
ENSRNOG00000000137	45.33	9.33	43.4	9.72	0.0158	0.22
ENSRNOG00000054764	41.67	9.33	44.18	9.93	0.0216	0.22
ENSRNOG00000018247	276	50.33	245.94	55.56	0.000457	0.23
ENSRNOG00000012807	1500.33	313.67	1458.12	331.89	1.48e-11	0.23
ENSRNOG00000019542	197.33	36.33	178.91	41.2	0.032	0.23
ENSRNOG00000005826	50.33	9.67	45.39	10.48	0.0474	0.23
ENSRNOG00000046031	13.33	2.33	11.54	2.7	0.04	0.23
ENSRNOG00000015514	97.67	20.67	91.54	21.43	0.014	0.23
ENSRNOG00000050156	14.67	3.33	15.03	3.54	0.0259	0.24
ENSRNOG00000059097	412	78	365.06	86.11	0.0158	0.24
ENSRNOG00000014385	52	12	55.47	13.12	0.03	0.24
ENSRNOG00000011533	333	69	316.08	76.29	0.0212	0.24
ENSRNOG00000058645	90.67	20.33	87.27	21.2	0.0407	0.24
ENSRNOG00000008176	58217.3	13230	56534.2	13734.8	0.0282	0.24
ENSRNOG00000009471	73	15.67	68.15	16.77	0.00203	0.25
ENSRNOG00000014288	2544	589.67	2598.93	642.17	0.000822	0.25
ENSRNOG00000021084	316.33	70.33	290.07	71.92	0.0103	0.25
ENSRNOG00000056947	77	15.33	69.23	17.19	0.0147	0.25
ENSRNOG00000053272	471.67	100.67	435.04	108.53	0.0391	0.25
ENSRNOG00000022764	74	16.33	68.45	17.22	0.0172	0.25
ENSRNOG00000010880	41.67	9.33	42.54	10.85	0.0282	0.25
ENSRNOG00000030012	21.33	5	20.69	5.3	0.0311	0.26
ENSRNOG00000060179	140	36	152.45	39.06	0.0316	0.26
ENSRNOG00000054957	26.67	7	28.43	7.29	0.0335	0.26
ENSRNOG00000037371	233.33	47.33	210.18	54.51	0.0163	0.26
ENSRNOG00000051780	20.33	5.33	20.62	5.42	0.028	0.26
ENSRNOG00000012804	1632.67	393.67	1570.75	414.82	6.28e-09	0.26
ENSRNOG00000012749	926.33	222.33	877.99	231.97	0.00185	0.26
ENSRNOG00000022218	1261.67	275.33	1142.27	303.64	0	0.27
ENSRNOG00000058568	85.33	24	93.76	24.96	0.0309	0.27
ENSRNOG00000053891	296	62.67	258.73	69.13	0.0187	0.27
ENSRNOG00000056219	51.33	13.33	51.21	13.69	0.032	0.27
ENSRNOG00000028814	834.33	175.67	724.38	194.03	0.0357	0.27
ENSRNOG00000029191	427.67	94	377.4	101.27	0.000432	0.27
ENSRNOG00000014061	713	169	659.31	177.09	1.34e-14	0.27
ENSRNOG00000014956	65.67	15.67	61.41	16.56	0.046	0.27
ENSRNOG00000052444	658.67	147	589.79	159.17	1.2e-05	0.27
ENSRNOG00000023969	1422.67	305.33	1248.76	337.21	3e-08	0.27
ENSRNOG00000001419	118.67	31.67	128.06	34.63	0.0321	0.27
ENSRNOG00000005371	37.67	9.33	37.12	10.14	0.038	0.27
ENSRNOG00000000463	134.33	29	120.01	32.83	0.0337	0.27
ENSRNOG00000026235	25.33	6.33	24.58	6.73	0.0492	0.27
ENSRNOG00000053766	34.33	9	36.14	9.92	0.0311	0.27
ENSRNOG00000026053	13.33	3.67	14.18	3.97	0.0395	0.28
ENSRNOG00000019854	60	15.33	56.62	15.91	0.0441	0.28
ENSRNOG00000022637	2075.67	603.33	2162.13	607.47	0.0247	0.28
ENSRNOG00000047746	369.33	105	375.12	106.01	0.0428	0.28
ENSRNOG00000008412	27.67	7.33	26.45	7.51	0.0452	0.28
ENSRNOG00000052064	49	12.33	47.53	13.56	0.0346	0.29
ENSRNOG00000020991	104.33	26.33	97.01	27.71	0.0272	0.29
ENSRNOG00000006384	375.67	88	336.8	96.38	0.00151	0.29
ENSRNOG00000008947	68.33	20.33	74.56	21.41	0.0424	0.29
ENSRNOG00000005825	3104	832	2983.9	858.74	0.00015	0.29
ENSRNOG00000049994	335	78.67	300.82	87.09	0.00755	0.29
ENSRNOG00000033881	35	10	36.15	10.49	0.0261	0.29
ENSRNOG00000048389	29	7	26.6	7.72	0.0443	0.29
ENSRNOG00000027277	22	6.33	22.06	6.41	0.0357	0.29
ENSRNOG00000050714	27	7.33	26.94	7.83	0.0359	0.29
ENSRNOG00000030467	291.33	71.33	271.99	79.25	0.0402	0.29
ENSRNOG00000008015	436.67	105.33	400.14	116.73	0.0105	0.29
ENSRNOG00000003895	32	7.67	28.89	8.49	0.0423	0.29
ENSRNOG00000011136	17.33	5	18.02	5.3	0.0352	0.29
ENSRNOG00000056955	71.67	21	76.39	22.51	0.0321	0.29
ENSRNOG00000002396	17.67	5	17.97	5.3	0.0288	0.29
ENSRNOG00000036603	187.33	49	175.16	51.87	0.0279	0.3
ENSRNOG00000003950	21.67	5.67	21.43	6.39	0.0271	0.3
ENSRNOG00000029658	2685.33	663.33	2404.52	718.1	1.84e-14	0.3
ENSRNOG00000047349	45	11.67	41.59	12.47	0.0143	0.3
ENSRNOG00000028895	497.67	122.67	450.45	135.17	0	0.3
ENSRNOG00000007918	65.67	18	64.1	19.42	0.0426	0.3
ENSRNOG00000038955	65.67	16.67	59.32	17.98	0.00474	0.3
ENSRNOG00000039976	122	35.67	126.64	38.39	0.023	0.3
ENSRNOG00000009106	189.67	52.67	173.22	53.17	0.0275	0.31
ENSRNOG00000029195	689.33	173.33	622.16	191.28	0	0.31
ENSRNOG00000057811	115.33	35.33	116.63	35.92	0.0221	0.31
ENSRNOG00000024230	28.67	7.67	26.81	8.27	0.00558	0.31
ENSRNOG00000028566	287.67	81	275.32	85.11	0.015	0.31
ENSRNOG00000002776	37	9.33	32.73	10.15	0.0309	0.31
ENSRNOG00000004630	30.67	7.33	25.75	8.05	0.0279	0.31
ENSRNOG00000012660	621.33	189	612.61	192.54	0.0292	0.31
ENSRNOG00000008400	394.33	103.33	358.46	112.82	0	0.31
ENSRNOG00000009425	51.33	13.67	43.72	13.82	0.0259	0.32
ENSRNOG00000006418	243.33	64.67	217.15	68.77	0.0152	0.32
ENSRNOG00000024115	134	42.67	139.66	44.28	0.0298	0.32
ENSRNOG00000028041	47.33	13.33	44.91	14.24	0.0468	0.32
ENSRNOG00000027811	51.67	15.33	49.82	15.8	0.0348	0.32
ENSRNOG00000019118	15.67	5	16.68	5.3	0.0355	0.32
ENSRNOG00000061264	30	9.33	30.2	9.61	0.0338	0.32
ENSRNOG00000038835	26.33	7.67	24.94	7.95	0.0432	0.32
ENSRNOG00000011502	49.67	12.67	43.25	13.79	0.0339	0.32
ENSRNOG00000009204	42.67	13.33	45.92	14.67	0.036	0.32
ENSRNOG00000054561	88	23	81.81	26.22	0.027	0.32
ENSRNOG00000000787	395.67	97.67	346.91	111.26	0.0129	0.32
ENSRNOG00000017157	37	10.67	33.48	10.83	0.0386	0.32
ENSRNOG00000015421	75	22	72.94	23.72	0.0418	0.33
ENSRNOG00000023614	80.33	21	70.65	23.05	0.0491	0.33
ENSRNOG00000019440	58.67	16.33	54.42	17.76	0.0027	0.33
ENSRNOG00000008196	272	74.67	246.51	80.75	0.00503	0.33
ENSRNOG00000007091	3526	973.33	3277.01	1079.47	1.78e-15	0.33
ENSRNOG00000036837	30	9	28.58	9.49	0.0359	0.33
ENSRNOG00000015297	19.33	6	19.21	6.4	0.0311	0.33
ENSRNOG00000038784	57.33	17.33	56.58	18.86	0.0309	0.33
ENSRNOG00000054990	63.67	21.33	64.98	21.66	0.0342	0.33
ENSRNOG00000006735	16.67	5.33	16.87	5.63	0.0362	0.33
ENSRNOG00000018454	6320.33	2055.33	6577.07	2196.58	0.0376	0.33
ENSRNOG00000001229	792.33	237.67	776.19	261.2	0.0139	0.34
ENSRNOG00000050509	24.33	7.67	23.93	8.06	0.0273	0.34
ENSRNOG00000000552	36.33	10	32.11	10.81	0.0269	0.34
ENSRNOG00000009343	49.67	16	53.04	17.86	0.0356	0.34
ENSRNOG00000002946	107	32.67	102.68	34.65	0.0483	0.34
ENSRNOG00000032240	559.67	154.67	501.88	169.5	0.0332	0.34
ENSRNOG00000000177	21.67	6.67	21.48	7.28	0.0259	0.34
ENSRNOG00000002031	39	10	34.07	11.56	0.0334	0.34
ENSRNOG00000045924	1166.67	309.67	1044.1	354.46	0.0179	0.34
ENSRNOG00000003622	685	212.67	645.94	220.01	0.0168	0.34
ENSRNOG00000001943	28.33	9	27.21	9.28	0.0347	0.34
ENSRNOG00000018557	50.33	14.33	44.25	15.12	0.0329	0.34
ENSRNOG00000049629	17.33	5.67	17.42	5.96	0.0419	0.34
ENSRNOG00000020519	26.33	8.33	25.78	8.83	0.0309	0.34
ENSRNOG00000038960	37.33	11	33.82	11.59	0.0217	0.34
ENSRNOG00000053260	47.33	15.33	45.04	15.47	0.0322	0.34
ENSRNOG00000003807	31	8.33	26.93	9.26	0.0273	0.34
ENSRNOG00000007690	490	133	432.94	148.88	0.0204	0.34
ENSRNOG00000022704	20.67	6.67	20.16	6.96	0.0309	0.34
ENSRNOG00000050220	59.67	17.67	57.19	19.73	0.0306	0.34
ENSRNOG00000007539	897.67	249	791.26	273.31	0.0138	0.35
ENSRNOG00000014375	34.67	12	36.41	12.59	0.035	0.35
ENSRNOG00000012557	137.33	43	134.26	46.44	0.0401	0.35
ENSRNOG00000000777	2371	665.67	2129.61	737.88	1.11e-16	0.35
ENSRNOG00000031138	357.67	102.33	320.09	111.07	0.0303	0.35
ENSRNOG00000020985	78.33	22.67	71.16	24.82	0.042	0.35
ENSRNOG00000007886	47.33	13.33	42.62	14.88	0.0445	0.35
ENSRNOG00000021199	141.33	44	133.74	46.8	0.0268	0.35
ENSRNOG00000048315	1235	357.33	1105.59	387.07	0.0158	0.35
ENSRNOG00000048222	292.33	84.67	262.09	91.88	0.0302	0.35
ENSRNOG00000043085	191.33	56.33	165.41	58.01	0.0462	0.35
ENSRNOG00000054592	21.67	6.67	19.82	6.95	0.0361	0.35
ENSRNOG00000030930	35	10.67	31.94	11.26	0.0448	0.35
ENSRNOG00000059456	22	7.33	21.27	7.51	0.0259	0.35
ENSRNOG00000015157	87	27.33	81.52	28.82	0.0349	0.35
ENSRNOG00000025074	20.33	7.67	22.16	7.84	0.0333	0.35
ENSRNOG00000053927	36	12	34.03	12.05	0.0331	0.35
ENSRNOG00000010575	145.67	43	129.04	45.81	0.0334	0.36
ENSRNOG00000001295	45	14.67	43.26	15.46	0.0225	0.36
ENSRNOG00000017448	20.67	6.67	20.35	7.28	0.0289	0.36
ENSRNOG00000016388	627.33	199.33	565.23	202.18	0.0135	0.36
ENSRNOG00000006227	579.67	170	522.94	187.45	0.00125	0.36
ENSRNOG00000010918	80.67	26.67	79.42	28.47	0.0309	0.36
ENSRNOG00000031081	1240	364.33	1112.12	398.86	0.00893	0.36
ENSRNOG00000021100	116.67	38	112.23	40.39	0.0489	0.36
ENSRNOG00000022640	29.67	9.33	28.35	10.26	0.0431	0.36
ENSRNOG00000016945	2101.67	555	1828.79	663.3	0.0176	0.36
ENSRNOG00000015184	46	16.67	47.76	17.45	0.0386	0.37
ENSRNOG00000029784	40.33	13.33	38.39	14.02	0.0431	0.37
ENSRNOG00000020678	378.67	114.67	349.71	127.96	0.0172	0.37
ENSRNOG00000017277	65.33	21.67	60.68	22.21	0.0415	0.37
ENSRNOG00000012892	35.67	12.33	34.99	12.81	0.0342	0.37
ENSRNOG00000016196	60.33	18.67	54.55	19.97	0.0458	0.37
ENSRNOG00000016308	45.33	14.33	42.07	15.44	0.0302	0.37
ENSRNOG00000037632	43	13.67	38.46	14.14	0.0269	0.37
ENSRNOG00000033693	25	8.33	23.71	8.72	0.0354	0.37
ENSRNOG00000033220	645	185	573.22	210.96	0.0182	0.37
ENSRNOG00000031168	28.33	9	26.94	9.92	0.0454	0.37
ENSRNOG00000011885	25.33	8.67	25.46	9.38	0.0312	0.37
ENSRNOG00000001704	45	15.67	43.75	16.13	0.033	0.37
ENSRNOG00000010994	47	15.67	45.13	16.66	0.0297	0.37
ENSRNOG00000014079	3298	1034.67	3026.16	1117.62	5.55e-16	0.37
ENSRNOG00000002053	91.67	34.33	99.77	36.86	0.0352	0.37
ENSRNOG00000056772	31.33	11	30.71	11.38	0.0304	0.37
ENSRNOG00000021424	30.67	10	28.3	10.49	0.0317	0.37
ENSRNOG00000025231	25.67	8.67	25.27	9.38	0.0288	0.37
ENSRNOG00000016257	286.33	95	274.99	102.06	0.0313	0.37
ENSRNOG00000023628	104	32.67	93.3	34.65	0.0293	0.37
ENSRNOG00000021053	88	30.33	85.12	31.9	0.0362	0.37
ENSRNOG00000022975	95	33	91.25	34.24	0.0357	0.38
ENSRNOG00000009465	201.33	67.67	197.75	74.42	0.0409	0.38
ENSRNOG00000022565	84	28.67	79.53	30.03	0.0484	0.38
ENSRNOG00000006553	25.33	9	25.35	9.6	0.0334	0.38
ENSRNOG00000000699	651	220	604.59	229.52	0.00734	0.38
ENSRNOG00000028390	79.67	26	73.17	27.8	0.0296	0.38
ENSRNOG00000016606	20	5.67	17.36	6.61	0.0334	0.38
ENSRNOG00000002142	29	10	26.67	10.17	0.0302	0.38
ENSRNOG00000004249	92.67	33	88.37	33.7	0.0216	0.38
ENSRNOG00000011094	1262.67	377	1110.72	423.81	0.0246	0.38
ENSRNOG00000039461	26.33	8.67	24.55	9.37	0.0216	0.38
ENSRNOG00000059827	40.33	14.33	39.71	15.23	0.0307	0.38
ENSRNOG00000037080	19.33	7	20.08	7.72	0.0349	0.38
ENSRNOG00000018644	29.67	10.33	27.84	10.71	0.0301	0.38
ENSRNOG00000029768	27.67	9.67	25.75	9.94	0.0365	0.39
ENSRNOG00000002470	531.67	170.33	481.19	185.8	0.0253	0.39
ENSRNOG00000021569	27	9.67	25.66	9.94	0.0334	0.39
ENSRNOG00000053122	151.67	53	140.06	54.36	0.0298	0.39
ENSRNOG00000053232	23.33	8	22.45	8.71	0.023	0.39
ENSRNOG00000049105	28	9.33	26.38	10.25	0.0475	0.39
ENSRNOG00000031743	1073.33	337	958.52	372.95	0.0281	0.39
ENSRNOG00000009912	78.33	26	72.82	28.35	0.0449	0.39
ENSRNOG00000023536	133	51	138.79	54.08	0.0419	0.39
ENSRNOG00000000457	644	207	585.59	228.22	2e-06	0.39
ENSRNOG00000000768	57.67	17.33	50.8	19.83	0.0394	0.39
ENSRNOG00000014293	53.67	20	55.06	21.51	0.0395	0.39
ENSRNOG00000033143	42.33	15.67	40.67	15.91	0.0304	0.39
ENSRNOG00000014202	43	15.67	42.29	16.56	0.0342	0.39
ENSRNOG00000013481	473.33	168.67	461.47	180.86	0.0489	0.39
ENSRNOG00000022242	224.67	73.67	200.96	78.8	0.0296	0.39
ENSRNOG00000009822	68.33	24	63.57	24.96	0.0309	0.39
ENSRNOG00000042322	23	8	22.4	8.82	0.0286	0.39
ENSRNOG00000012779	83.67	31.33	81.59	32.14	0.0307	0.39
ENSRNOG00000003897	6252	2296.67	6303.95	2485.3	0.0451	0.39
ENSRNOG00000033893	439	152	413.3	162.99	0.0167	0.39
ENSRNOG00000014320	65	21.67	58.98	23.28	0.0298	0.39
ENSRNOG00000014532	317.33	111.33	300.03	118.63	0.0395	0.4
ENSRNOG00000011181	57.33	22.67	57.88	22.99	0.0358	0.4
ENSRNOG00000000156	39	14.33	40.44	16.2	0.0317	0.4
ENSRNOG00000006151	36.33	12	32.76	13.12	0.0406	0.4
ENSRNOG00000023943	4504	1590.33	4174	1674.15	0.0149	0.4
ENSRNOG00000060687	62.67	22.33	57.23	22.98	0.0327	0.4
ENSRNOG00000025094	37.67	13.67	34.67	13.92	0.026	0.4
ENSRNOG00000046254	213.67	81.33	208.82	83.94	0.0359	0.4
ENSRNOG00000010685	178	61.33	165.7	66.63	0.0286	0.4
ENSRNOG00000019478	641.67	210.67	577.08	232.21	3.21e-05	0.4
ENSRNOG00000002525	40	14	36.74	14.79	0.0309	0.4
ENSRNOG00000005903	40	14.67	39.42	15.88	0.0306	0.4
ENSRNOG00000002302	1184	418.67	1069.21	431.05	0.0268	0.4
ENSRNOG00000005810	26.33	10	24.94	10.06	0.0405	0.4
ENSRNOG00000019430	360.67	127	345.42	139.38	0.0401	0.4
ENSRNOG00000014021	26.33	9	25.02	10.14	0.0332	0.41
ENSRNOG00000008415	130	46.33	125.08	50.72	0.0433	0.41
ENSRNOG00000016346	472	164.33	434.01	176	0.0169	0.41
ENSRNOG00000033912	30.67	10	26.62	10.81	0.0259	0.41
ENSRNOG00000052761	18.67	7	18.43	7.5	0.0384	0.41
ENSRNOG00000020165	25.67	9.67	25.19	10.26	0.0394	0.41
ENSRNOG00000015445	38.67	14.33	36.02	14.7	0.0292	0.41
ENSRNOG00000012471	270.33	107.67	270.1	110.21	0.0351	0.41
ENSRNOG00000011631	24.67	9.33	24.34	9.93	0.0399	0.41
ENSRNOG00000003183	177.67	66	174.29	71.16	0.0224	0.41
ENSRNOG00000010018	113.33	42.33	106.26	43.41	0.0331	0.41
ENSRNOG00000013674	46	16.33	41.37	16.9	0.0327	0.41
ENSRNOG00000050697	361	133.67	347.55	142.15	0.0484	0.41
ENSRNOG00000020845	276.67	103	268.22	110.12	0.0366	0.41
ENSRNOG00000047800	146.33	56.33	140.63	57.78	0.0216	0.41
ENSRNOG00000015366	87.33	31.33	84.5	34.72	0.0217	0.41
ENSRNOG00000001216	48	18	44.6	18.34	0.0345	0.41
ENSRNOG00000007437	108	39.67	102.86	42.37	0.0299	0.41
ENSRNOG00000019477	34.67	12	32.06	13.23	0.0296	0.41
ENSRNOG00000014987	16.67	6	16.81	6.94	0.0315	0.41
ENSRNOG00000054033	26.33	10	25.65	10.6	0.0342	0.41
ENSRNOG00000009073	32.67	11	30.45	12.67	0.0412	0.42
ENSRNOG00000016826	162	62.67	156.36	65.16	0.032	0.42
ENSRNOG00000005621	64.67	24.67	62.93	26.26	0.028	0.42
ENSRNOG00000027008	891.67	309	794.14	331.67	0.0168	0.42
ENSRNOG00000017703	313.33	118	302.09	126.34	0.0333	0.42
ENSRNOG00000039858	131.67	48.33	123.58	51.75	0.0481	0.42
ENSRNOG00000053494	190.33	79	195.82	82.06	0.0409	0.42
ENSRNOG00000004409	60.67	21.33	55.49	23.27	0.0431	0.42
ENSRNOG00000033564	196.67	76	193.34	81.1	0.0273	0.42
ENSRNOG00000024237	20	8.33	21.05	8.83	0.0335	0.42
ENSRNOG00000054964	23.33	9.33	22.66	9.51	0.028	0.42
ENSRNOG00000008465	650.67	249.67	637.26	267.37	0.049	0.42
ENSRNOG00000002524	30	10.67	27.6	11.58	0.0345	0.42
ENSRNOG00000010045	30.67	12.33	29.75	12.49	0.0334	0.42
ENSRNOG00000003170	45.33	17.67	43.9	18.44	0.0411	0.42
ENSRNOG00000016701	54.67	20.33	52.73	22.17	0.0231	0.42
ENSRNOG00000042139	108.33	41	101.27	42.63	0.0371	0.42
ENSRNOG00000000500	29.67	12	28.87	12.16	0.0352	0.42
ENSRNOG00000003732	89.33	36	91.08	38.4	0.0395	0.42
ENSRNOG00000004578	16	6.67	16.24	6.85	0.0331	0.42
ENSRNOG00000024349	33	13	31.66	13.37	0.0353	0.42
ENSRNOG00000003959	41	15.33	39.42	16.65	0.0216	0.42
ENSRNOG00000005565	32	11.67	29.25	12.36	0.0303	0.42
ENSRNOG00000021962	155.67	62.67	156.31	66.12	0.0326	0.42
ENSRNOG00000000528	88	33.33	82.95	35.1	0.0298	0.42
ENSRNOG00000021157	593.33	227.33	562.69	238.14	0.0252	0.42
ENSRNOG00000046216	26.33	10.33	24.55	10.39	0.0354	0.42
ENSRNOG00000014597	422	161.33	396.07	167.65	0.0415	0.42
ENSRNOG00000043193	46.33	17.33	45.5	19.29	0.0404	0.42
ENSRNOG00000009211	57.67	22.67	54.91	23.31	0.0346	0.42
ENSRNOG00000023334	805	282.33	723.19	307.36	0.0284	0.43
ENSRNOG00000000525	1827	693	1704.72	724.79	0.0174	0.43
ENSRNOG00000011913	547	211	528.17	224.68	0.04	0.43
ENSRNOG00000023400	324.67	110	289.56	123.21	0.0477	0.43
ENSRNOG00000058329	30	12.67	30.6	13.03	0.0448	0.43
ENSRNOG00000019270	59.33	23.33	56.25	23.98	0.0299	0.43
ENSRNOG00000007765	109	39.33	102.55	43.76	0.0339	0.43
ENSRNOG00000017525	29.67	11.33	27.19	11.6	0.0415	0.43
ENSRNOG00000057058	30	12	29.72	12.69	0.0397	0.43
ENSRNOG00000029500	666.67	241.33	618.05	264.13	0.00226	0.43
ENSRNOG00000012965	67.33	24	61.64	26.35	0.0391	0.43
ENSRNOG00000006932	49	18.33	45.8	19.64	0.0452	0.43
ENSRNOG00000049782	314.33	118.67	304.35	130.55	0.035	0.43
ENSRNOG00000015994	18	6.33	15.41	6.63	0.0346	0.43
ENSRNOG00000006723	45.67	17	43.57	18.74	0.0292	0.43
ENSRNOG00000050430	70.33	27	67.54	29.12	0.0334	0.43
ENSRNOG00000016374	31.67	12.33	31.19	13.45	0.0402	0.43
ENSRNOG00000014137	2164.67	804.33	2021.9	872.42	0	0.43
ENSRNOG00000005655	83.33	30.33	76.99	33.3	0.0459	0.43
ENSRNOG00000039048	43.33	17	40.6	17.56	0.029	0.43
ENSRNOG00000013794	200	79.67	195.17	84.43	0.0358	0.43
ENSRNOG00000013215	36	13.67	33.58	14.57	0.031	0.43
ENSRNOG00000046414	29.67	11.33	27.71	12.03	0.0263	0.43
ENSRNOG00000025736	23	9.33	23.36	10.15	0.0319	0.43
ENSRNOG00000006231	92.33	37	87.75	38.21	0.028	0.44
ENSRNOG00000030712	1707.67	622	1601.36	697.66	0.00817	0.44
ENSRNOG00000015972	317.67	122	287.26	125.2	0.0234	0.44
ENSRNOG00000058470	191.33	79.67	189.54	82.8	0.0422	0.44
ENSRNOG00000047741	51.33	19.33	47.39	20.74	0.039	0.44
ENSRNOG00000020563	46.33	20	46.41	20.34	0.0294	0.44
ENSRNOG00000012109	38	14.67	36	15.78	0.034	0.44
ENSRNOG00000055650	52.33	21.33	51.13	22.41	0.0319	0.44
ENSRNOG00000014125	45.67	18.67	43.82	19.22	0.0381	0.44
ENSRNOG00000022921	50.67	20.33	48.78	21.41	0.0346	0.44
ENSRNOG00000006940	75	29.67	71.11	31.24	0.0278	0.44
ENSRNOG00000007271	23.67	9.33	22.85	10.04	0.0303	0.44
ENSRNOG00000000853	211.33	83	200.98	88.38	0.049	0.44
ENSRNOG00000026060	24.33	10.33	24.58	10.82	0.0383	0.44
ENSRNOG00000017434	38	15.67	37.84	16.67	0.0397	0.44
ENSRNOG00000009848	42	16.67	40.55	17.87	0.0342	0.44
ENSRNOG00000014835	33.33	14	32.33	14.26	0.0363	0.44
ENSRNOG00000012681	1348.33	484.67	1230.61	542.99	6.46e-09	0.44
ENSRNOG00000008697	277.33	120	290.3	128.12	0.0425	0.44
ENSRNOG00000043098	555.33	198	490.65	216.71	0.0152	0.44
ENSRNOG00000010977	695.67	291.33	698.62	309.27	0.0464	0.44
ENSRNOG00000001270	19.33	8.33	19.12	8.51	0.0324	0.45
ENSRNOG00000046081	21	9	20.57	9.17	0.0288	0.45
ENSRNOG00000009311	191.33	73.33	176.99	78.98	0.023	0.45
ENSRNOG00000039457	32.67	13.67	31.91	14.25	0.0396	0.45
ENSRNOG00000011947	44.33	19	43.54	19.44	0.0304	0.45
ENSRNOG00000003304	86.67	33.33	75.88	33.93	0.0291	0.45
ENSRNOG00000001103	133.67	54.33	127.64	57.08	0.0352	0.45
ENSRNOG00000017063	163.33	68	159.9	71.52	0.0307	0.45
ENSRNOG00000016177	34.67	13.33	32.46	14.56	0.0281	0.45
ENSRNOG00000004019	1748.33	661.67	1632.94	734.2	3.74e-06	0.45
ENSRNOG00000002273	159	65.67	156.18	70.29	0.0331	0.45
ENSRNOG00000061813	56	19.67	50.65	22.79	0.0398	0.45
ENSRNOG00000000456	413.33	158.67	390.32	175.71	0.0464	0.45
ENSRNOG00000061254	66	29.33	65.97	29.73	0.029	0.45
ENSRNOG00000049115	103	41.33	97.21	43.82	0.0476	0.45
ENSRNOG00000002802	31	11	27.38	12.34	0.0389	0.45
ENSRNOG00000018517	486	182.67	437.08	197.13	0.00254	0.45
ENSRNOG00000027747	22.33	9	21.51	9.71	0.0345	0.45
ENSRNOG00000003357	19361.7	7907	18873.5	8519.26	0.0175	0.45
ENSRNOG00000003486	218.33	87.33	208.18	94.1	0.0337	0.45
ENSRNOG00000002305	47.67	18.67	42.88	19.44	0.0303	0.45
ENSRNOG00000023428	71	28.67	68.09	30.89	0.027	0.45
ENSRNOG00000010181	25.33	10.67	24.81	11.26	0.0395	0.45
ENSRNOG00000020369	662.33	249.33	605.52	275.09	0.0391	0.45
ENSRNOG00000009263	4988	1870.33	4539.29	2068	1.14e-14	0.46
ENSRNOG00000024159	314.67	127	298.76	136.16	0.0304	0.46
ENSRNOG00000058003	609	240.33	579.83	265.25	0.0337	0.46
ENSRNOG00000019659	27	10.67	24.61	11.26	0.026	0.46
ENSRNOG00000017445	35	14	32.55	14.9	0.0397	0.46
ENSRNOG00000013747	90.67	38.33	88.48	40.51	0.0344	0.46
ENSRNOG00000005378	57	24.33	55	25.19	0.0417	0.46
ENSRNOG00000004063	103.33	44.33	100.54	46.05	0.032	0.46
ENSRNOG00000034190	101.33	37.67	91.88	42.1	0.0487	0.46
ENSRNOG00000046707	36.33	15.33	35.18	16.12	0.0423	0.46
ENSRNOG00000061739	74.33	28	65.28	30.01	0.0317	0.46
ENSRNOG00000010635	1600.33	674.67	1601.45	736.92	0.0428	0.46
ENSRNOG00000025587	70.67	31.67	74.06	34.09	0.033	0.46
ENSRNOG00000004307	210.33	83.67	197.16	90.77	0.0289	0.46
ENSRNOG00000021137	90.33	36.33	86.21	39.7	0.0327	0.46
ENSRNOG00000017819	155.67	63.67	144.94	66.79	0.0223	0.46
ENSRNOG00000002331	145	55.67	134.8	62.16	0.0425	0.46
ENSRNOG00000000994	49.33	21	47.56	21.97	0.0325	0.46
ENSRNOG00000020593	71.67	28.67	67.56	31.21	0.0499	0.46
ENSRNOG00000048449	74	29.67	68.05	31.46	0.0298	0.46
ENSRNOG00000049028	57.67	24	52.98	24.53	0.0395	0.46
ENSRNOG00000031475	329.33	135.67	319.09	147.79	0.0344	0.46
ENSRNOG00000052256	161.67	69.33	161.87	75.02	0.0311	0.46
ENSRNOG00000010146	29.67	12.67	28.8	13.36	0.0379	0.46
ENSRNOG00000007377	326	143.67	327.4	151.99	0.0265	0.46
ENSRNOG00000010375	102.67	40.67	95.25	44.23	0.033	0.46
ENSRNOG00000016469	171.67	70.67	165.18	76.77	0.0297	0.46
ENSRNOG00000021334	18.33	6.33	15.86	7.38	0.0432	0.47
ENSRNOG00000008194	1373	526.67	1230.55	573.62	0.000133	0.47
ENSRNOG00000023679	33.33	13.67	32.14	15	0.031	0.47
ENSRNOG00000025053	5484.33	2250.33	5153.65	2405.49	0.0147	0.47
ENSRNOG00000009019	1046.67	417	956.09	447.05	3.58e-05	0.47
ENSRNOG00000028545	364.67	158.67	351.41	164.41	0.031	0.47
ENSRNOG00000004458	49.67	21	47.4	22.19	0.0259	0.47
ENSRNOG00000012208	39.33	16.33	36.52	17.11	0.0297	0.47
ENSRNOG00000016294	390	167	365.63	171.78	0.0296	0.47
ENSRNOG00000025881	87.33	37	83.36	39.18	0.0342	0.47
ENSRNOG00000030021	428.33	184.67	412.71	193.97	0.0351	0.47
ENSRNOG00000018092	76	32.33	71.89	33.79	0.0303	0.47
ENSRNOG00000016343	2187.33	898.67	2021.24	953.39	0.000833	0.47
ENSRNOG00000009096	58.67	25.67	56.84	26.83	0.0398	0.47
ENSRNOG00000011550	27.33	12	26.19	12.37	0.0359	0.47
ENSRNOG00000042905	1653.33	653.33	1520.56	719.45	0	0.47
ENSRNOG00000039759	31	14	30.08	14.26	0.0288	0.47
ENSRNOG00000020699	152	64.67	143.74	68.33	0.0308	0.48
ENSRNOG00000016208	89.67	39.33	85.63	40.76	0.0315	0.48
ENSRNOG00000024041	42.67	17.33	36.89	17.57	0.0306	0.48
ENSRNOG00000032618	138.33	55.67	126.57	60.34	0.0368	0.48
ENSRNOG00000012752	21.33	9	20.57	9.81	0.0364	0.48
ENSRNOG00000050251	49.67	20	44.83	21.4	0.0218	0.48
ENSRNOG00000032708	312.33	132	293.01	139.95	0.0311	0.48
ENSRNOG00000014197	95.67	38.67	88.43	42.24	0.026	0.48
ENSRNOG00000018715	304.67	131	287.12	137.35	0.0306	0.48
ENSRNOG00000009331	75.67	33.33	71.77	34.36	0.0352	0.48
ENSRNOG00000047714	26.67	11.33	25.12	12.03	0.0318	0.48
ENSRNOG00000018126	520.33	225.67	500.8	240.25	0.0426	0.48
ENSRNOG00000000907	120.67	52.67	113.48	54.45	0.0313	0.48
ENSRNOG00000010266	40	17	36.57	17.56	0.0394	0.48
ENSRNOG00000008471	62.33	26.67	58.73	28.25	0.026	0.48
ENSRNOG00000007866	12	6	12.86	6.19	0.0487	0.48
ENSRNOG00000004772	60.67	24.33	54.65	26.36	0.0336	0.48
ENSRNOG00000015411	72.67	31.33	68.87	33.22	0.0335	0.48
ENSRNOG00000031163	185.33	74.67	168.39	81.29	0.0261	0.48
ENSRNOG00000009436	26.33	11	24.44	11.8	0.0298	0.48
ENSRNOG00000002385	161.33	67.67	153.08	74.1	0.035	0.48
ENSRNOG00000055751	132.67	54.33	122.89	59.55	0.0453	0.48
ENSRNOG00000017762	71.33	29.67	64.91	31.46	0.0486	0.48
ENSRNOG00000000855	27.67	12.33	26.87	13.03	0.0385	0.48
ENSRNOG00000017412	28	12	26.38	12.79	0.0431	0.49
ENSRNOG00000019138	114.67	53.67	116.17	56.41	0.0312	0.49
ENSRNOG00000003687	164.67	70	152.04	73.83	0.0303	0.49
ENSRNOG00000061994	32	13.67	28.43	13.82	0.0282	0.49
ENSRNOG00000024595	28.33	13	27.28	13.26	0.032	0.49
ENSRNOG00000016756	47	20.33	43.8	21.31	0.0305	0.49
ENSRNOG00000014367	30.67	13.33	30.14	14.67	0.0284	0.49
ENSRNOG00000043416	117.33	51.33	114.01	55.49	0.0318	0.49
ENSRNOG00000042029	167.33	73.33	163.01	79.64	0.0272	0.49
ENSRNOG00000015812	748	318	705.65	345.03	0.0176	0.49
ENSRNOG00000006079	72.33	30.33	66.31	32.44	0.0372	0.49
ENSRNOG00000036604	1232.67	476	1078.98	528.15	0.0453	0.49
ENSRNOG00000055049	106.67	48.33	112.74	55.19	0.0429	0.49
ENSRNOG00000051915	35.33	14.67	33.09	16.21	0.0297	0.49
ENSRNOG00000007607	749	307.33	666.53	326.45	0.0216	0.49
ENSRNOG00000042838	1468	606.33	1358.05	665.2	0.031	0.49
ENSRNOG00000023463	872	333.67	782.64	383.36	0.048	0.49
ENSRNOG00000047446	26.33	11.67	25.44	12.47	0.0324	0.49
ENSRNOG00000055962	4020.67	1813.33	3944.17	1932.93	0.0418	0.49
ENSRNOG00000022428	44	20	40.78	20.02	0.0331	0.49
ENSRNOG00000010841	159	74.67	158.49	77.83	0.0362	0.49
ENSRNOG00000048831	53.33	22.67	48.75	23.95	0.0324	0.49
ENSRNOG00000033747	569.67	227.67	515.33	253.3	0.0283	0.49
ENSRNOG00000006767	34.33	14.67	32.09	15.78	0.0247	0.49
ENSRNOG00000049828	110.67	48.33	106.99	52.61	0.027	0.49
ENSRNOG00000031515	64.33	27.33	58.95	29.03	0.0217	0.49
ENSRNOG00000050024	24.67	11	23.53	11.59	0.0351	0.49
ENSRNOG00000000239	37.33	16.33	34.49	17	0.0374	0.49
ENSRNOG00000060130	113.67	48.33	106.1	52.5	0.0332	0.49
ENSRNOG00000014297	392.67	165.67	375.66	185.9	0.0498	0.49
ENSRNOG00000011016	50	22.67	47.29	23.42	0.0397	0.5
ENSRNOG00000007613	200	93	197	97.59	0.0367	0.5
ENSRNOG00000020038	618	278.67	607.47	301.48	0.0468	0.5
ENSRNOG00000049349	80.33	34	74.36	36.95	0.0216	0.5
ENSRNOG00000022101	35.67	14.67	32.38	16.1	0.0347	0.5
ENSRNOG00000010332	39.33	16.67	37.2	18.52	0.0313	0.5
ENSRNOG00000015551	402.67	169.67	368.11	183.24	0.0174	0.5
ENSRNOG00000046313	102.67	47.67	103.01	51.31	0.0364	0.5
ENSRNOG00000058166	35	16	33.69	16.79	0.035	0.5
ENSRNOG00000021412	418.67	170.67	372.86	185.84	0.0434	0.5
ENSRNOG00000018863	110.33	48	104.4	52.07	0.0358	0.5
ENSRNOG00000000638	68	28.33	61.66	30.77	0.0317	0.5
ENSRNOG00000010349	70.33	31.33	64.57	32.25	0.0423	0.5
ENSRNOG00000005214	72.67	32	70.2	35.07	0.0394	0.5
ENSRNOG00000031801	48	21.67	47.46	23.71	0.0363	0.5
ENSRNOG00000060528	505.33	222.33	477.83	238.76	0.0435	0.5
ENSRNOG00000036829	166	75.33	157.52	78.73	0.0326	0.5
ENSRNOG00000046699	105.67	48.33	104.52	52.26	0.0347	0.5
ENSRNOG00000009932	33.67	15.33	33.07	16.55	0.0363	0.5
ENSRNOG00000048088	36.67	17.67	36.61	18.33	0.0429	0.5
ENSRNOG00000038881	166.33	70.33	154	77.19	0.0442	0.5
ENSRNOG00000013840	37.67	17.33	35.23	17.68	0.0288	0.5
ENSRNOG00000028774	60.33	27.33	58.66	29.46	0.0405	0.5
ENSRNOG00000060773	168	72	153.93	77.34	0.0499	0.5
ENSRNOG00000024998	107.67	49	103.24	51.88	0.0344	0.5
ENSRNOG00000007679	233.67	104.33	218.48	109.83	0.0357	0.5
ENSRNOG00000010208	270.33	121.33	256.05	128.88	0.0283	0.5
ENSRNOG00000039459	22	10.67	21.94	11.05	0.0426	0.5
ENSRNOG00000007808	59	26.33	53.72	27.07	0.0363	0.5
ENSRNOG00000008600	23.67	11.33	24.07	12.14	0.0424	0.5
ENSRNOG00000015616	40	16.67	36.06	18.19	0.0279	0.5
ENSRNOG00000019207	58	28	56.25	28.4	0.0349	0.5
ENSRNOG00000026953	23.67	10.33	23.33	11.78	0.0379	0.51
ENSRNOG00000012442	28.33	13.33	27.32	13.8	0.0331	0.51
ENSRNOG00000048487	89	40.33	85.8	43.36	0.0312	0.51
ENSRNOG00000006962	27	12	25.91	13.12	0.0286	0.51
ENSRNOG00000049862	27.33	11.33	24.38	12.35	0.0318	0.51
ENSRNOG00000050210	508	205	451.38	228.83	0.0381	0.51
ENSRNOG00000004672	23.67	10.67	22.6	11.47	0.0397	0.51
ENSRNOG00000002429	20	8	17.13	8.71	0.0468	0.51
ENSRNOG00000024931	87	38.67	82.36	41.92	0.0221	0.51
ENSRNOG00000018835	304.67	140.67	288.3	146.86	0.0298	0.51
ENSRNOG00000058555	59.33	27.33	54.63	27.85	0.0354	0.51
ENSRNOG00000020923	45	20	41.55	21.19	0.0406	0.51
ENSRNOG00000037113	1053.67	437.33	950.09	484.79	0.0332	0.51
ENSRNOG00000027839	175	80	169.64	86.59	0.0276	0.51
ENSRNOG00000056184	29.33	14	29.37	15.01	0.0432	0.51
ENSRNOG00000008713	39.33	18	36.51	18.66	0.0367	0.51
ENSRNOG00000011316	93.67	41.67	84.19	43.07	0.0288	0.51
ENSRNOG00000033256	26.33	11	24.11	12.34	0.0322	0.51
ENSRNOG00000058096	144	67.33	138.56	70.98	0.0317	0.51
ENSRNOG00000027550	70.33	30	63.59	32.65	0.0345	0.51
ENSRNOG00000018414	898.67	424.67	853.39	438.29	0.045	0.51
ENSRNOG00000001953	238.67	107	225.76	116.04	0.0366	0.51
ENSRNOG00000013564	37.33	18.33	36.71	18.89	0.0335	0.51
ENSRNOG00000056714	44.33	19.33	39.88	20.53	0.0302	0.51
ENSRNOG00000017980	227.33	101	204.89	105.57	0.0346	0.52
ENSRNOG00000053577	146.33	63.33	131.45	67.77	0.0339	0.52
ENSRNOG00000019308	212	96	198.35	102.42	0.046	0.52
ENSRNOG00000000187	168	81.67	165.52	85.47	0.0397	0.52
ENSRNOG00000047924	27	13.33	27.9	14.45	0.0459	0.52
ENSRNOG00000019728	107.33	50.67	102.69	53.21	0.0397	0.52
ENSRNOG00000047606	34.67	15.67	32.57	16.88	0.0345	0.52
ENSRNOG00000000459	515.67	219.33	474.7	246.41	0.0481	0.52
ENSRNOG00000023708	301	136	284.3	147.59	0.0437	0.52
ENSRNOG00000016516	77	34	70.77	36.74	0.0396	0.52
ENSRNOG00000007970	50.33	24	48.48	25.17	0.0351	0.52
ENSRNOG00000057619	76.67	35.33	71.63	37.31	0.0411	0.52
ENSRNOG00000032596	183.67	74.33	160.66	83.76	0.0417	0.52
ENSRNOG00000025634	91	44.33	87.09	45.41	0.0362	0.52
ENSRNOG00000016117	364.33	169	344.46	179.7	0.0495	0.52
ENSRNOG00000028016	40.67	19.67	39.15	20.43	0.0292	0.52
ENSRNOG00000018350	36.67	17	35.08	18.31	0.0354	0.52
ENSRNOG00000017220	433	191	396.28	206.83	0.0176	0.52
ENSRNOG00000042825	182	83.33	165.96	86.68	0.0304	0.52
ENSRNOG00000030625	1096.33	507.67	1032.41	540.01	0.0189	0.52
ENSRNOG00000014420	44.33	20	41.68	21.83	0.0292	0.52
ENSRNOG00000039668	827.67	394.67	786.55	412.14	0.0438	0.52
ENSRNOG00000027296	26	12	24.43	12.8	0.0327	0.52
ENSRNOG00000004854	41.67	19	38.52	20.2	0.0334	0.52
ENSRNOG00000008336	59.33	30	59.48	31.25	0.0401	0.53
ENSRNOG00000050485	612.33	290.33	593.44	311.81	0.0497	0.53
ENSRNOG00000031890	1331.33	604	1193.86	627.74	0.0297	0.53
ENSRNOG00000008554	131	62	124.07	65.25	0.0327	0.53
ENSRNOG00000012830	66.67	31	61.29	32.24	0.0347	0.53
ENSRNOG00000039744	1459	626	1331	700.43	0.0298	0.53
ENSRNOG00000024452	43.33	19	38.34	20.19	0.0305	0.53
ENSRNOG00000054251	40.67	20.67	41.08	21.64	0.0427	0.53
ENSRNOG00000047367	49.67	23.67	46.9	24.74	0.0396	0.53
ENSRNOG00000062039	31	13.67	28.79	15.21	0.0308	0.53
ENSRNOG00000002134	113	45	102.09	53.95	0.0407	0.53
ENSRNOG00000012946	246.33	108	223.26	118	0.0327	0.53
ENSRNOG00000020813	1242	588	1203.07	636.29	0.0306	0.53
ENSRNOG00000021447	29.33	13.33	28.13	14.88	0.0365	0.53
ENSRNOG00000011153	300.33	137.33	278.82	147.62	0.0248	0.53
ENSRNOG00000045967	82.67	41	86.58	45.85	0.0456	0.53
ENSRNOG00000046663	38.67	19	38.12	20.2	0.032	0.53
ENSRNOG00000052219	760	358	732.54	388.17	0.0369	0.53
ENSRNOG00000046261	34.67	16	32.66	17.32	0.0339	0.53
ENSRNOG00000010204	106.33	48	98.39	52.18	0.0313	0.53
ENSRNOG00000013720	1046.67	496	1017.19	540.28	0.0498	0.53
ENSRNOG00000045838	182	84	170.44	90.57	0.047	0.53
ENSRNOG00000011821	387.33	182.33	373.85	198.75	0.0359	0.53
ENSRNOG00000006604	95.67	48.33	93.49	49.7	0.0331	0.53
ENSRNOG00000001469	3205.67	1572	3237.53	1723.65	0.0281	0.53
ENSRNOG00000017496	533	247.33	506.47	269.75	0.0347	0.53
ENSRNOG00000018992	337.33	153	314.08	167.29	0.0355	0.53
ENSRNOG00000029912	98	47.33	94.45	50.32	0.0396	0.53
ENSRNOG00000039861	104.67	48	98.13	52.38	0.0224	0.53
ENSRNOG00000002052	4602.33	2190.67	4439.78	2372.03	0.0151	0.53
ENSRNOG00000027742	337.33	159.67	319.16	170.69	0.0342	0.53
ENSRNOG00000013231	110.33	52.33	104.38	55.84	0.0269	0.53
ENSRNOG00000013820	39	18	35.03	18.77	0.0365	0.54
ENSRNOG00000013920	163.33	76	150.37	80.59	0.0313	0.54
ENSRNOG00000025142	52.67	24	47.72	25.6	0.0367	0.54
ENSRNOG00000033215	415	189.67	384.95	206.66	0.0441	0.54
ENSRNOG00000003772	359.33	176	347.56	186.6	0.0351	0.54
ENSRNOG00000011101	84	38.33	79.41	42.66	0.0377	0.54
ENSRNOG00000023576	47.67	23.67	45.83	24.63	0.0331	0.54
ENSRNOG00000054945	62.33	30.33	64.16	34.48	0.0459	0.54
ENSRNOG00000046280	42	19.33	38.99	20.96	0.0361	0.54
ENSRNOG00000050841	51	23.67	47.81	25.7	0.0334	0.54
ENSRNOG00000020193	29.33	14.33	27.91	15.01	0.0331	0.54
ENSRNOG00000000451	340.33	162.67	322.54	173.79	0.022	0.54
ENSRNOG00000011585	44.67	23	43.28	23.32	0.0432	0.54
ENSRNOG00000045829	399.67	198.67	383.42	206.82	0.0304	0.54
ENSRNOG00000024846	197.33	95	192.08	103.68	0.0395	0.54
ENSRNOG00000000054	118.67	56.67	116.74	63.05	0.0363	0.54
ENSRNOG00000016156	60.67	28.33	58.92	31.84	0.0296	0.54
ENSRNOG00000019977	243.33	118	238.91	129.14	0.0379	0.54
ENSRNOG00000056656	85.33	42.33	81.07	43.85	0.035	0.54
ENSRNOG00000022067	33	17	31.67	17.13	0.0425	0.54
ENSRNOG00000027037	44	20.33	39.32	21.31	0.0394	0.54
ENSRNOG00000003232	226	109	221.35	119.96	0.0412	0.54
ENSRNOG00000009705	98.33	43.33	87.28	47.31	0.0403	0.54
ENSRNOG00000001375	31.33	15	29.71	16.11	0.035	0.54
ENSRNOG00000060360	52.67	24	47.17	25.61	0.0337	0.54
ENSRNOG00000012972	126	59.67	114.71	62.28	0.0322	0.54
ENSRNOG00000003348	66	30.33	58.56	31.8	0.0281	0.54
ENSRNOG00000021663	32	16	31.09	16.88	0.046	0.54
ENSRNOG00000000034	118.67	54	108.22	58.88	0.03	0.54
ENSRNOG00000059947	102.33	49.67	100.69	54.8	0.0351	0.54
ENSRNOG00000007081	3743.33	1667.33	3361.31	1829.36	0	0.54
ENSRNOG00000046599	29.67	15	28.03	15.25	0.0358	0.54
ENSRNOG00000013220	279.33	130.33	259.4	141.3	0.0399	0.54
ENSRNOG00000015727	62.33	28.33	56.08	30.56	0.0321	0.54
ENSRNOG00000046207	146.67	70	138.1	75.26	0.0262	0.54
ENSRNOG00000001766	357.33	169.67	323.66	176.45	0.0395	0.55
ENSRNOG00000040122	51.33	23.67	47.93	26.13	0.0341	0.55
ENSRNOG00000018824	81	38.67	77.28	42.13	0.0337	0.55
ENSRNOG00000015519	770.67	342	696.38	380.18	0.026	0.55
ENSRNOG00000013072	200.33	103	193.58	105.73	0.0368	0.55
ENSRNOG00000045992	45.67	23.33	43.68	23.86	0.043	0.55
ENSRNOG00000027253	25.33	12.67	24.4	13.36	0.0289	0.55
ENSRNOG00000021578	33.33	15	30	16.43	0.0416	0.55
ENSRNOG00000012273	86.67	39	77.7	42.57	0.0317	0.55
ENSRNOG00000028064	28	13	26.13	14.33	0.0424	0.55
ENSRNOG00000000543	43	21	40.85	22.4	0.0365	0.55
ENSRNOG00000025151	35.33	18	33.62	18.44	0.0498	0.55
ENSRNOG00000004441	163	78.67	150.27	82.48	0.0296	0.55
ENSRNOG00000021029	237.33	114	220.88	121.27	0.0331	0.55
ENSRNOG00000002343	29.67	14.67	28.93	15.89	0.0292	0.55
ENSRNOG00000017897	31	14.33	28.5	15.66	0.0308	0.55
ENSRNOG00000012881	710.67	336.33	656.32	360.71	0.0417	0.55
ENSRNOG00000000824	184	88.33	174.62	96.07	0.0335	0.55
ENSRNOG00000020744	1113.67	511.67	994.92	547.38	0.0128	0.55
ENSRNOG00000007707	138.67	64.67	129.81	71.44	0.0326	0.55
ENSRNOG00000061080	130.67	66.33	125.99	69.45	0.035	0.55
ENSRNOG00000011750	34	16.67	31.46	17.34	0.0425	0.55
ENSRNOG00000010986	142	67	133.06	73.44	0.0335	0.55
ENSRNOG00000012817	45	22.33	43.36	23.94	0.032	0.55
ENSRNOG00000032844	676.33	328	633.57	350.22	0.0422	0.55
ENSRNOG00000003018	160	80.67	152.61	84.37	0.042	0.55
ENSRNOG00000004192	132	62.67	120.99	66.98	0.0327	0.55
ENSRNOG00000015078	2509	1161	2336.87	1294.72	0.0183	0.55
ENSRNOG00000006867	269.33	127.67	245.18	135.87	0.0403	0.55
ENSRNOG00000016538	101.67	53.33	100.37	55.66	0.0322	0.55
ENSRNOG00000002950	89.33	45	85.79	47.58	0.0352	0.55
ENSRNOG00000048431	258.33	125	244.99	136.11	0.0292	0.56
ENSRNOG00000026644	106.67	51	98.12	54.51	0.0241	0.56
ENSRNOG00000059491	55.67	27.67	50.91	28.29	0.0323	0.56
ENSRNOG00000026702	31.67	15	28.38	15.79	0.0391	0.56
ENSRNOG00000007159	73.33	36.67	70.96	39.49	0.0294	0.56
ENSRNOG00000003298	23	10.67	20.04	11.15	0.0384	0.56
ENSRNOG00000059140	118.33	55.67	109.48	60.98	0.0227	0.56
ENSRNOG00000012782	400.67	191	373.42	208.01	0.0348	0.56
ENSRNOG00000000041	51	25.33	46.22	25.76	0.0381	0.56
ENSRNOG00000056228	64.33	31	60.16	33.53	0.0425	0.56
ENSRNOG00000004398	487.67	250.67	494.97	275.93	0.0353	0.56
ENSRNOG00000027466	25.67	11	22.12	12.34	0.0424	0.56
ENSRNOG00000000441	83	41.33	80.34	44.89	0.0354	0.56
ENSRNOG00000018484	77	38	71.29	39.85	0.0287	0.56
ENSRNOG00000058337	37.67	19.67	36.15	20.21	0.0429	0.56
ENSRNOG00000007133	1327.67	650	1245.84	696.77	0.0185	0.56
ENSRNOG00000009656	89	46.33	91.09	50.95	0.0431	0.56
ENSRNOG00000003476	23.33	12.33	23.09	12.92	0.045	0.56
ENSRNOG00000051237	33.67	15.67	29.37	16.45	0.0331	0.56
ENSRNOG00000016695	2992.33	1436	2782.34	1559.2	0.0128	0.56
ENSRNOG00000013046	91.33	45	85.41	47.9	0.033	0.56
ENSRNOG00000020667	963	458.33	896.38	503.03	0.0191	0.56
ENSRNOG00000000723	176.33	76.33	156.4	87.79	0.0359	0.56
ENSRNOG00000020349	182.33	88	169.78	95.31	0.0464	0.56
ENSRNOG00000010650	55.33	27.33	50.85	28.6	0.0352	0.56
ENSRNOG00000016978	39.33	18.33	35.31	19.85	0.0397	0.56
ENSRNOG00000019163	24.33	11.67	21.79	12.25	0.0456	0.56
ENSRNOG00000003866	391.33	182	359.06	202.04	0.0317	0.56
ENSRNOG00000060341	44	23	42	23.64	0.0432	0.56
ENSRNOG00000015354	316.67	155.33	298.77	168.22	0.0333	0.56
ENSRNOG00000002540	26	12.33	22.94	12.92	0.0303	0.56
ENSRNOG00000058940	39	20.33	37.46	21.1	0.0332	0.56
ENSRNOG00000012579	30	14	27.79	15.65	0.0395	0.56
ENSRNOG00000022189	67.67	32	63.18	35.6	0.0396	0.56
ENSRNOG00000045846	63.67	32.33	60.32	34.01	0.0351	0.56
ENSRNOG00000010302	150.67	77.67	144.52	81.49	0.0397	0.56
ENSRNOG00000008257	78.33	38	75.64	42.65	0.0301	0.56
ENSRNOG00000009360	61.33	31	60.42	34.07	0.0331	0.56
ENSRNOG00000004273	353	172.33	331.62	187.05	0.0299	0.56
ENSRNOG00000003581	73.67	38	71.59	40.39	0.0293	0.56
ENSRNOG00000018830	85	41.67	79.26	44.79	0.0259	0.57
ENSRNOG00000018911	827	380.67	735.24	415.79	0.0417	0.57
ENSRNOG00000029682	466.67	230.33	445.33	251.87	0.0331	0.57
ENSRNOG00000000158	42	20.67	40.9	23.14	0.0419	0.57
ENSRNOG00000012160	146	73	137.7	78.01	0.0341	0.57
ENSRNOG00000007675	35.33	18	33.51	19	0.0489	0.57
ENSRNOG00000026958	32.67	15.33	29.37	16.65	0.0396	0.57
ENSRNOG00000007457	2243.33	1082.67	2056.65	1166.61	8.61e-05	0.57
ENSRNOG00000001005	66.33	30	57.43	32.64	0.0467	0.57
ENSRNOG00000037331	21.33	11	20.76	11.8	0.041	0.57
ENSRNOG00000013014	383.67	192.67	374.83	213.2	0.0304	0.57
ENSRNOG00000006878	39.67	20	36.88	20.98	0.0341	0.57
ENSRNOG00000006548	682.67	338.33	646.35	367.84	0.048	0.57
ENSRNOG00000023664	30.67	15.67	28.72	16.35	0.0352	0.57
ENSRNOG00000048951	118	55	107.56	61.4	0.0307	0.57
ENSRNOG00000050108	82.33	41	76.49	43.71	0.0331	0.57
ENSRNOG00000007540	39.67	20	36.7	20.97	0.0459	0.57
ENSRNOG00000004649	25.67	13.67	24.35	13.92	0.046	0.57
ENSRNOG00000014659	107.67	51.33	97.56	55.8	0.0397	0.57
ENSRNOG00000032825	963.67	436	908.37	519.65	0.0333	0.57
ENSRNOG00000004540	715	360.67	691.97	395.89	0.0357	0.57
ENSRNOG00000000529	178.67	89.33	164.97	94.48	0.0288	0.57
ENSRNOG00000058545	108.67	53	100.31	57.46	0.0278	0.57
ENSRNOG00000010461	133.33	68.67	129.13	74.03	0.0361	0.57
ENSRNOG00000054008	60	31.33	58.31	33.44	0.0318	0.57
ENSRNOG00000060984	154	73.67	137.86	79.09	0.0361	0.57
ENSRNOG00000013917	349	179.67	326.98	187.61	0.0275	0.57
ENSRNOG00000046405	95.33	46	89.66	51.46	0.035	0.57
ENSRNOG00000015957	535.33	267.33	494.44	283.84	0.0415	0.57
ENSRNOG00000019422	719.33	332.33	633.12	363.57	0.0352	0.57
ENSRNOG00000011387	277.33	140.33	258.19	148.36	0.0219	0.57
ENSRNOG00000046050	59	28	52.23	30.01	0.0397	0.57
ENSRNOG00000030027	196	94.67	179.56	103.23	0.0465	0.57
ENSRNOG00000021261	94	48.67	88.3	50.8	0.0354	0.58
ENSRNOG00000019211	164.67	85	156.91	90.39	0.0393	0.58
ENSRNOG00000027264	120	60.67	112.98	65.1	0.041	0.58
ENSRNOG00000016381	65.67	32.67	61.39	35.42	0.0355	0.58
ENSRNOG00000003715	67.67	34.33	63.41	36.63	0.0282	0.58
ENSRNOG00000008246	893	451	853.68	493.27	0.0357	0.58
ENSRNOG00000061524	31	15.67	28.65	16.55	0.0382	0.58
ENSRNOG00000033570	56.67	30	54.6	31.58	0.0329	0.58
ENSRNOG00000002975	24	12.67	22.89	13.25	0.0345	0.58
ENSRNOG00000051850	112.33	58	103.52	59.97	0.0346	0.58
ENSRNOG00000010296	83	42	76.41	44.27	0.0409	0.58
ENSRNOG00000014294	192.67	96.33	177.29	102.74	0.0219	0.58
ENSRNOG00000021438	39.67	20.33	36.94	21.42	0.0279	0.58
ENSRNOG00000022769	264.33	125.33	238.95	138.58	0.0237	0.58
ENSRNOG00000057159	30.67	15.67	28.17	16.34	0.0426	0.58
ENSRNOG00000018467	73.67	34.33	65.31	37.92	0.0361	0.58
ENSRNOG00000006715	28	14.33	26.4	15.34	0.0364	0.58
ENSRNOG00000008816	454.33	247.33	440.66	256.08	0.0395	0.58
ENSRNOG00000020030	390	194.33	360.38	209.46	0.0335	0.58
ENSRNOG00000010776	548.67	271	508.53	295.58	0.0431	0.58
ENSRNOG00000012061	53	26.33	48.18	28.03	0.0341	0.58
ENSRNOG00000007261	70.67	35	64.11	37.3	0.0331	0.58
ENSRNOG00000023214	21.67	11.67	21.24	12.37	0.0459	0.58
ENSRNOG00000019528	51	26	47.93	27.92	0.0416	0.58
ENSRNOG00000004837	1068	541.33	982.44	572.61	0.0128	0.58
ENSRNOG00000014311	110.33	56	105	61.21	0.0396	0.58
ENSRNOG00000059683	31	16	28.96	16.89	0.0357	0.58
ENSRNOG00000007907	32.67	17.67	32.35	18.87	0.0457	0.58
ENSRNOG00000001425	32	16	30.03	17.53	0.0365	0.58
ENSRNOG00000002568	31.33	15	29.59	17.29	0.0426	0.58
ENSRNOG00000020942	410	203.67	386.34	226.09	0.0314	0.59
ENSRNOG00000012991	414.67	218.67	398.3	233.09	0.0299	0.59
ENSRNOG00000002345	42.33	22	39.6	23.18	0.0352	0.59
ENSRNOG00000056332	49.33	25.33	44.53	26.07	0.033	0.59
ENSRNOG00000005960	170	90.33	159.31	93.32	0.0331	0.59
ENSRNOG00000002659	45.33	24.33	44.09	25.83	0.0401	0.59
ENSRNOG00000027808	39.33	19.67	36.51	21.39	0.034	0.59
ENSRNOG00000016167	51.67	27.33	49.32	28.92	0.0285	0.59
ENSRNOG00000031669	151.67	83.33	148.21	86.9	0.0302	0.59
ENSRNOG00000048924	513.67	274.33	491.17	288.75	0.0324	0.59
ENSRNOG00000020867	193	101	186.86	109.85	0.0397	0.59
ENSRNOG00000020119	66	35	62.89	36.97	0.0325	0.59
ENSRNOG00000003947	556	290	518	305.38	0.0429	0.59
ENSRNOG00000015902	114.67	63.33	113.54	66.99	0.0429	0.59
ENSRNOG00000048580	186	97.33	179.83	106.1	0.0389	0.59
ENSRNOG00000016794	295.33	141.67	270.34	159.57	0.0262	0.59
ENSRNOG00000013169	89.33	46	84.57	49.96	0.0358	0.59
ENSRNOG00000001138	121.33	61	112.19	66.29	0.0319	0.59
ENSRNOG00000020300	523.67	264.67	481.29	284.44	0.0287	0.59
ENSRNOG00000042576	38.67	20.33	37.5	22.17	0.0392	0.59
ENSRNOG00000009354	457.33	233.67	426.07	251.83	0.0304	0.59
ENSRNOG00000000277	62.33	32.67	58.79	34.77	0.0333	0.59
ENSRNOG00000004361	472.33	235.33	431.76	255.48	0.0488	0.59
ENSRNOG00000029141	182.33	92.67	166.38	98.46	0.0335	0.59
ENSRNOG00000053728	20.33	11.33	19.96	11.81	0.0477	0.59
ENSRNOG00000009867	836	428.67	801.77	474.58	0.0296	0.59
ENSRNOG00000003244	47.67	25.33	44.6	26.4	0.033	0.59
ENSRNOG00000003442	101.67	50.67	92.25	54.62	0.0376	0.59
ENSRNOG00000037604	543	276.67	498.51	295.19	0.0458	0.59
ENSRNOG00000017123	20852.7	10361.7	19512.6	11560.3	0.00616	0.59
ENSRNOG00000015945	41.33	19.67	35.75	21.19	0.049	0.59
ENSRNOG00000020679	231	114.33	215.88	127.95	0.0327	0.59
ENSRNOG00000010646	197.33	100.67	186.71	110.7	0.0321	0.59
ENSRNOG00000016225	98	50.67	92.39	54.83	0.0413	0.59
ENSRNOG00000012721	688.33	342.67	615.24	365.13	0.0347	0.59
ENSRNOG00000010319	765.67	392.33	701.48	416.42	0.0396	0.59
ENSRNOG00000001337	497	259.67	459.13	272.61	0.046	0.59
ENSRNOG00000008678	215.33	116	207.2	123.08	0.0386	0.59
ENSRNOG00000029597	27.33	14.33	25.82	15.34	0.0351	0.59
ENSRNOG00000003463	247.67	129.67	233.96	139.05	0.0301	0.59
ENSRNOG00000018076	79.33	41.67	75.17	44.69	0.0364	0.59
ENSRNOG00000024557	34.33	17.33	32.44	19.29	0.0422	0.59
ENSRNOG00000019675	112.33	57.67	103.88	61.79	0.029	0.59
ENSRNOG00000011478	78	38	70.26	41.8	0.0331	0.59
ENSRNOG00000012172	210.67	112.33	201.35	119.84	0.0422	0.6
ENSRNOG00000013886	153	82.33	145.59	86.66	0.035	0.6
ENSRNOG00000014530	649.67	335	601.65	358.24	0.043	0.6
ENSRNOG00000029501	38	20.33	36.32	21.63	0.0312	0.6
ENSRNOG00000032922	158.67	83	152.7	90.98	0.0351	0.6
ENSRNOG00000017359	3261.33	1701.67	3129.52	1865.44	0.0414	0.6
ENSRNOG00000038047	427.67	208	374.45	223.54	0.0308	0.6
ENSRNOG00000007369	533.33	272.67	504.28	301.3	0.0235	0.6
ENSRNOG00000001427	79	40.67	72.21	43.15	0.0397	0.6
ENSRNOG00000043077	674	354.67	652.04	389.66	0.0334	0.6
ENSRNOG00000003189	63.33	33	63.17	37.79	0.0499	0.6
ENSRNOG00000051922	556.33	270	499.55	298.86	0.0416	0.6
ENSRNOG00000046779	48	23.33	41.84	25.04	0.0459	0.6
ENSRNOG00000056658	78.67	41	71.85	43.06	0.0357	0.6
ENSRNOG00000007443	608.33	302	549.07	329.1	0.027	0.6
ENSRNOG00000014251	148	77.67	143.44	86	0.0292	0.6
ENSRNOG00000004089	411.67	218.67	404.46	242.54	0.0397	0.6
ENSRNOG00000003120	1629.67	851.67	1530.88	918.07	0.0284	0.6
ENSRNOG00000018217	27	14	25.37	15.22	0.0355	0.6
ENSRNOG00000021161	101	54.33	95.63	57.4	0.034	0.6
ENSRNOG00000011971	3487	1762.33	3187.45	1913.84	0	0.6
ENSRNOG00000008373	150.33	76.67	133.96	80.46	0.0422	0.6
ENSRNOG00000032472	40.67	20.33	37.58	22.6	0.0362	0.6
ENSRNOG00000005580	228.67	121.67	219.55	132.04	0.0415	0.6
ENSRNOG00000006778	65.67	35.33	63.99	38.49	0.0395	0.6
ENSRNOG00000042070	32.67	17	29.56	17.78	0.0292	0.6
ENSRNOG00000020580	72	35.33	65.04	39.13	0.0395	0.6
ENSRNOG00000001241	63	33	58.52	35.21	0.0331	0.6
ENSRNOG00000017003	629	343	599.73	361.1	0.0225	0.6
ENSRNOG00000004417	171.67	87	159.76	96.26	0.0395	0.6
ENSRNOG00000043044	217.67	113.33	206.95	124.7	0.0365	0.6
ENSRNOG00000052070	119.33	66.33	118.76	71.59	0.0431	0.6
ENSRNOG00000002097	423.33	217.67	385.24	232.26	0.0269	0.6
ENSRNOG00000007033	37.67	20	35.67	21.51	0.0279	0.6
ENSRNOG00000003613	101.67	53.67	96.36	58.14	0.0352	0.6
ENSRNOG00000042376	25.67	14.67	25.09	15.14	0.0484	0.6
ENSRNOG00000014797	387	201.33	359.76	217.11	0.0483	0.6
ENSRNOG00000042686	294	141.67	261.01	157.63	0.0302	0.6
ENSRNOG00000025558	72	39.67	67.12	40.56	0.0427	0.6
ENSRNOG00000018971	220.67	118	212.16	128.27	0.0395	0.6
ENSRNOG00000010941	49	25.33	46.3	28	0.03	0.6
ENSRNOG00000039730	213	109.67	196.41	118.82	0.0233	0.6
ENSRNOG00000043182	53	27.33	47.62	28.81	0.0338	0.61
ENSRNOG00000054437	55.33	30	51.64	31.25	0.0309	0.61
ENSRNOG00000000047	359.33	193.33	345.77	209.25	0.0304	0.61
ENSRNOG00000000483	164.33	88	154.1	93.27	0.036	0.61
ENSRNOG00000061442	191.33	94.67	173.24	104.95	0.0339	0.61
ENSRNOG00000001094	91.67	49.67	85.66	51.9	0.0325	0.61
ENSRNOG00000017803	115	60	108.43	65.72	0.0395	0.61
ENSRNOG00000012420	863.33	470.33	823.06	498.93	0.04	0.61
ENSRNOG00000007338	1452.67	781.67	1361.39	825.31	0.0395	0.61
ENSRNOG00000002794	27.33	15.33	26.57	16.12	0.0473	0.61
ENSRNOG00000025384	39.33	20.33	37.94	23.02	0.0456	0.61
ENSRNOG00000039455	28.33	15.33	27.09	16.45	0.0449	0.61
ENSRNOG00000008943	7431.67	3608.33	6582.12	3999.47	0.0152	0.61
ENSRNOG00000019330	103	52.33	96.48	58.62	0.0295	0.61
ENSRNOG00000001414	973	493	885.82	538.35	0.0299	0.61
ENSRNOG00000008409	171	91.33	160.85	97.76	0.0413	0.61
ENSRNOG00000015160	59.33	32	56.63	34.42	0.0437	0.61
ENSRNOG00000011921	115.33	62.67	109.48	66.55	0.0356	0.61
ENSRNOG00000046452	29	16.33	28.64	17.43	0.0487	0.61
ENSRNOG00000061379	7938.33	4151.33	7229.92	4400.7	0.000349	0.61
ENSRNOG00000045997	82.67	42	76.94	46.84	0.0343	0.61
ENSRNOG00000033815	29.67	14.67	26.79	16.31	0.0325	0.61
ENSRNOG00000006591	42	22.33	38.76	23.62	0.0365	0.61
ENSRNOG00000053968	78	44	76.07	46.37	0.043	0.61
ENSRNOG00000010598	115.67	60	109.87	67.02	0.0306	0.61
ENSRNOG00000015941	254.33	137.67	243.04	148.39	0.0397	0.61
ENSRNOG00000057826	43	24.67	42.1	25.73	0.0462	0.61
ENSRNOG00000014837	167.67	89.67	157.96	96.54	0.0335	0.61
ENSRNOG00000003759	37.67	20.67	35.05	21.42	0.0425	0.61
ENSRNOG00000036677	51	28	49.43	30.22	0.0457	0.61
ENSRNOG00000003736	1503.33	819.67	1434.44	877.88	0.0348	0.61
ENSRNOG00000001989	102.67	55.33	95.43	58.51	0.0354	0.61
ENSRNOG00000017020	188.67	100.33	175.26	107.47	0.0259	0.61
ENSRNOG00000012534	132	68.67	122.92	75.42	0.0302	0.61
ENSRNOG00000010661	27.67	15	25.55	15.68	0.0429	0.61
ENSRNOG00000023309	81	44	78.78	48.4	0.0418	0.61
ENSRNOG00000010219	274	147.67	259.44	159.42	0.0333	0.61
ENSRNOG00000034287	38.67	21.67	37.51	23.07	0.0432	0.61
ENSRNOG00000019615	206.33	108.67	191.43	117.71	0.0302	0.61
ENSRNOG00000026336	194.67	102.67	180.24	110.87	0.0218	0.62
ENSRNOG00000018986	170	90.33	160.61	98.81	0.0411	0.62
ENSRNOG00000032720	143.67	77.33	128.9	79.32	0.033	0.62
ENSRNOG00000008445	117.33	64	110.07	67.77	0.0378	0.62
ENSRNOG00000031930	66.33	35	60.03	36.98	0.0364	0.62
ENSRNOG00000004332	87	47	82.88	51.07	0.0356	0.62
ENSRNOG00000019482	607.67	326.33	551.87	340.11	0.0319	0.62
ENSRNOG00000014193	58.33	31	53.7	33.11	0.0333	0.62
ENSRNOG00000025448	141.33	76	135.47	83.58	0.0357	0.62
ENSRNOG00000025923	63	35	61.64	38.05	0.0426	0.62
ENSRNOG00000016058	82.67	44.33	79.99	49.38	0.04	0.62
ENSRNOG00000055567	129.33	70	121.12	74.81	0.0395	0.62
ENSRNOG00000043167	936	515.67	867.97	536.22	0.0353	0.62
ENSRNOG00000002538	43	22.33	40.14	24.8	0.0304	0.62
ENSRNOG00000002838	109	56.67	100.84	62.3	0.0345	0.62
ENSRNOG00000018267	48.33	27	47.83	29.56	0.0471	0.62
ENSRNOG00000010183	942	506	864.94	534.84	0.0346	0.62
ENSRNOG00000021724	59.33	30.33	54.55	33.73	0.0328	0.62
ENSRNOG00000002276	34	18	31.4	19.42	0.042	0.62
ENSRNOG00000021231	98	53.67	93.4	57.81	0.0354	0.62
ENSRNOG00000007084	43	21.33	38.64	23.91	0.0333	0.62
ENSRNOG00000043304	68	36.33	63.96	39.6	0.0282	0.62
ENSRNOG00000012513	66.67	37.33	64.15	39.73	0.043	0.62
ENSRNOG00000016852	23.67	12	21.35	13.23	0.0357	0.62
ENSRNOG00000014928	62.67	35	58.61	36.33	0.0463	0.62
ENSRNOG00000057927	95	49	85.03	52.84	0.0323	0.62
ENSRNOG00000016889	31.67	16.33	28.75	17.87	0.0394	0.62
ENSRNOG00000017783	285.67	162	275.46	171.21	0.0353	0.62
ENSRNOG00000023410	1591	802.67	1427.77	887.58	0.0396	0.62
ENSRNOG00000024089	594.67	327.33	554.15	344.68	0.0301	0.62
ENSRNOG00000007319	35	18.33	32.61	20.29	0.0284	0.62
ENSRNOG00000016163	72	39.33	66.33	41.29	0.0284	0.62
ENSRNOG00000048187	35.33	19	33.64	20.95	0.0379	0.62
ENSRNOG00000016413	93.33	48.67	86.4	53.8	0.0395	0.62
ENSRNOG00000047321	11490.3	6348.67	10957.8	6825.14	0.0458	0.62
ENSRNOG00000011054	432.33	237.67	403.69	251.66	0.0235	0.62
ENSRNOG00000037432	56.33	29.33	51.1	31.87	0.0365	0.62
ENSRNOG00000020263	373	209.67	350.84	218.87	0.0331	0.62
ENSRNOG00000029330	114	59.33	100.68	62.82	0.0355	0.62
ENSRNOG00000002983	754.33	422.67	706.21	440.66	0.0308	0.62
ENSRNOG00000018851	20	11.67	20.15	12.58	0.0498	0.62
ENSRNOG00000019533	30.33	17	28.65	17.89	0.0417	0.62
ENSRNOG00000022598	113.33	61.33	108.08	67.48	0.0306	0.62
ENSRNOG00000014089	121	67.33	114.78	71.73	0.0345	0.62
ENSRNOG00000027145	79	44.67	74.04	46.28	0.0375	0.63
ENSRNOG00000009329	824.67	434.33	723.98	452.58	0.0385	0.63
ENSRNOG00000008005	218	115.67	200.9	125.63	0.0271	0.63
ENSRNOG00000012720	331.33	173.33	299.9	187.56	0.0303	0.63
ENSRNOG00000047598	451	248.67	419.66	262.64	0.0331	0.63
ENSRNOG00000042137	99	52.67	91.8	57.46	0.0373	0.63
ENSRNOG00000025811	174.67	97.33	167.15	104.69	0.0358	0.63
ENSRNOG00000009850	401.33	212.33	366.31	229.49	0.0379	0.63
ENSRNOG00000014163	29	14.67	27.58	17.28	0.0497	0.63
ENSRNOG00000004699	407	227.67	383.08	240.13	0.0282	0.63
ENSRNOG00000002751	34.67	18.67	32.16	20.18	0.0304	0.63
ENSRNOG00000007062	352.67	189	334.22	209.77	0.0315	0.63
ENSRNOG00000004964	73.67	40	69.05	43.36	0.028	0.63
ENSRNOG00000042374	22	12.67	21.09	13.25	0.046	0.63
ENSRNOG00000016647	36.33	18.67	31.61	19.87	0.046	0.63
ENSRNOG00000019627	132.67	74	122.23	76.87	0.0331	0.63
ENSRNOG00000025889	29.33	15.33	26.13	16.44	0.0301	0.63
ENSRNOG00000056130	38.33	20.33	34.37	21.64	0.0429	0.63
ENSRNOG00000019387	462.67	250	429.98	270.7	0.0377	0.63
ENSRNOG00000015577	273	142.67	243.88	153.57	0.0396	0.63
ENSRNOG00000008510	265.33	147	246.96	155.63	0.031	0.63
ENSRNOG00000007284	302	152.33	270	170.17	0.0362	0.63
ENSRNOG00000043439	27.67	14.67	24.85	15.67	0.0331	0.63
ENSRNOG00000000190	232.33	129.33	217.12	136.97	0.0417	0.63
ENSRNOG00000013465	29.33	16	26.75	16.89	0.0446	0.63
ENSRNOG00000049575	95	56.33	93.05	58.75	0.046	0.63
ENSRNOG00000013064	30.67	16.67	27.63	17.44	0.046	0.63
ENSRNOG00000009495	223	127	216.89	137.02	0.0285	0.63
ENSRNOG00000020060	1129	622.67	1098.79	694.37	0.0323	0.63
ENSRNOG00000001627	374.33	209.67	356.66	225.54	0.0304	0.63
ENSRNOG00000008245	623.33	352	600.32	379.72	0.0305	0.63
ENSRNOG00000003148	3290	1848.67	3128.92	1979.7	0.039	0.63
ENSRNOG00000011517	108.33	59.33	102.24	64.74	0.0336	0.63
ENSRNOG00000010688	57.67	30.67	54.64	34.6	0.046	0.63
ENSRNOG00000003336	36.67	19.67	33.6	21.29	0.0365	0.63
ENSRNOG00000020514	72.67	42.67	68.71	43.54	0.0459	0.63
ENSRNOG00000049471	342	190.33	323.09	204.89	0.0314	0.63
ENSRNOG00000013641	31.33	17.67	30.26	19.19	0.0446	0.63
ENSRNOG00000004874	40	22.33	37.54	23.84	0.029	0.63
ENSRNOG00000021787	148.33	79.67	135.11	85.83	0.0305	0.64
ENSRNOG00000009949	167.33	92.67	155.57	98.89	0.0386	0.64
ENSRNOG00000053895	99	55	93.2	59.25	0.0361	0.64
ENSRNOG00000021031	1870.67	1043	1772.71	1127.06	0.0245	0.64
ENSRNOG00000002791	84	48	78	49.6	0.0401	0.64
ENSRNOG00000021062	284.33	153.67	262.61	166.97	0.0375	0.64
ENSRNOG00000000167	280.67	162.67	269.03	171.11	0.0292	0.64
ENSRNOG00000048651	166.67	94	164.08	104.4	0.0432	0.64
ENSRNOG00000017731	119.67	65.67	113.49	72.22	0.0315	0.64
ENSRNOG00000060087	697.67	381.33	641.31	408.12	0.0237	0.64
ENSRNOG00000020684	1264.67	722	1236.24	787.02	0.0263	0.64
ENSRNOG00000026466	36.33	21.67	36.06	22.96	0.0487	0.64
ENSRNOG00000002894	326.33	177.67	301.71	192.28	0.0298	0.64
ENSRNOG00000020441	42	22.67	38.25	24.38	0.0343	0.64
ENSRNOG00000046607	369.33	206.33	351.89	224.34	0.0306	0.64
ENSRNOG00000019689	3502	1960	3394.49	2165.36	0.0357	0.64
ENSRNOG00000029886	28818.3	16271	27435.2	17504.1	0.0248	0.64
ENSRNOG00000039754	77	43.33	70.94	45.27	0.0349	0.64
ENSRNOG00000016584	32	17.67	29.23	18.65	0.0441	0.64
ENSRNOG00000021856	27.67	16	26.46	16.89	0.0456	0.64
ENSRNOG00000009222	169.67	92.33	157.23	100.37	0.0259	0.64
ENSRNOG00000027290	26.67	16	26.6	17	0.0497	0.64
ENSRNOG00000019859	187	103	173.04	110.55	0.031	0.64
ENSRNOG00000005094	230.33	126.33	212.14	135.61	0.0334	0.64
ENSRNOG00000010718	152.67	85.33	144.91	92.65	0.0359	0.64
ENSRNOG00000021644	97	52.33	89.52	57.24	0.0395	0.64
ENSRNOG00000039204	28.33	15.33	25.04	16.01	0.0459	0.64
ENSRNOG00000020716	1790.33	974.67	1630.94	1043.4	0.0264	0.64
ENSRNOG00000019244	795.33	446	755.79	484.12	0.0359	0.64
ENSRNOG00000016575	209.33	116.33	195.29	125.11	0.0333	0.64
ENSRNOG00000011680	247.33	137.67	234.71	150.42	0.0395	0.64
ENSRNOG00000018576	55	31	51.61	33.11	0.0288	0.64
ENSRNOG00000007302	2416.67	1359.67	2245.44	1440.21	0.039	0.64
ENSRNOG00000019883	386.33	215.67	365.43	234.39	0.033	0.64
ENSRNOG00000020731	27.67	14.67	24.42	15.67	0.046	0.64
ENSRNOG00000011951	801.67	435	725.22	465.43	0.0303	0.64
ENSRNOG00000019718	142	75.33	127.02	81.53	0.0356	0.64
ENSRNOG00000022421	196	115	185.47	119.08	0.0324	0.64
ENSRNOG00000034126	37	20.67	33.7	21.64	0.0387	0.64
ENSRNOG00000018616	57.33	32	55.61	35.71	0.0463	0.64
ENSRNOG00000024711	44.67	26	42.63	27.38	0.0445	0.64
ENSRNOG00000007520	127	72	119.24	76.59	0.028	0.64
ENSRNOG00000022071	71	40.33	69.29	44.54	0.046	0.64
ENSRNOG00000021063	46.33	26.67	43.96	28.26	0.0449	0.64
ENSRNOG00000003614	61.33	34.67	57.47	36.97	0.0362	0.64
ENSRNOG00000018524	818.67	459	766.09	492.78	0.0341	0.64
ENSRNOG00000024277	72.33	39.33	66.83	43.01	0.0365	0.64
ENSRNOG00000000913	102	55.33	92.56	59.58	0.0395	0.64
ENSRNOG00000000569	370.33	208.33	348.16	224.17	0.0326	0.64
ENSRNOG00000016315	300.33	167	283.52	182.62	0.0332	0.64
ENSRNOG00000009341	69	38.33	63.32	40.83	0.0364	0.64
ENSRNOG00000000316	147.33	82.67	136.04	87.76	0.0365	0.65
ENSRNOG00000020636	224.33	127	215.5	139.07	0.0326	0.65
ENSRNOG00000058891	73.67	40	69.49	44.85	0.0431	0.65
ENSRNOG00000040287	299	161.33	274.29	177.08	0.0419	0.65
ENSRNOG00000026647	343	190	312.81	202.06	0.0397	0.65
ENSRNOG00000005935	152.67	87	145.7	94.2	0.0289	0.65
ENSRNOG00000008144	448.67	238.33	407.18	263.37	0.0229	0.65
ENSRNOG00000009726	199	112.33	185.01	119.73	0.0395	0.65
ENSRNOG00000049714	162	89	152.13	98.45	0.0352	0.65
ENSRNOG00000021437	3831.33	2263.33	3644.49	2358.72	0.0304	0.65
ENSRNOG00000020583	1131.67	637	1081.99	700.93	0.0241	0.65
ENSRNOG00000024923	97.67	55.33	89.13	57.74	0.0424	0.65
ENSRNOG00000014333	142	78.33	131.26	85.04	0.0289	0.65
ENSRNOG00000009751	186	103.67	173.11	112.18	0.0329	0.65
ENSRNOG00000046202	93	55	88.26	57.21	0.0424	0.65
ENSRNOG00000020344	145.67	85	138.73	89.96	0.0317	0.65
ENSRNOG00000025100	122.67	68.33	112.79	73.15	0.0372	0.65
ENSRNOG00000022635	33.67	18.33	30.61	19.85	0.0331	0.65
ENSRNOG00000003033	527	296	496.51	322.09	0.0333	0.65
ENSRNOG00000000579	780	432.33	744.57	483.05	0.0301	0.65
ENSRNOG00000020372	119.67	69.67	113.64	73.74	0.0327	0.65
ENSRNOG00000004972	482.67	254.67	437.16	283.72	0.032	0.65
ENSRNOG00000031598	28.67	16	26.16	17	0.0329	0.65
ENSRNOG00000012110	35.67	21.67	34.82	22.63	0.0487	0.65
ENSRNOG00000005807	63.33	35.33	59.04	38.38	0.0298	0.65
ENSRNOG00000005126	131.67	77	125.28	81.45	0.0334	0.65
ENSRNOG00000036911	36.33	20.67	33.78	21.97	0.0312	0.65
ENSRNOG00000028156	149	85.67	139.43	90.72	0.0293	0.65
ENSRNOG00000014555	344.33	185.33	314.3	204.52	0.0276	0.65
ENSRNOG00000020150	216	118.67	200.28	130.33	0.0336	0.65
ENSRNOG00000009113	76	45.67	73.39	47.8	0.0484	0.65
ENSRNOG00000010833	78.33	42.67	71.76	46.74	0.0432	0.65
ENSRNOG00000005900	68.67	39.33	64.36	41.93	0.0287	0.65
ENSRNOG00000002832	111.67	62.33	104.21	67.93	0.0356	0.65
ENSRNOG00000019310	67.67	39	63.12	41.17	0.0419	0.65
ENSRNOG00000017092	32.67	18.67	29.95	19.54	0.046	0.65
ENSRNOG00000057147	71.33	39.67	66.75	43.55	0.0279	0.65
ENSRNOG00000016846	229	128.33	211.7	138.14	0.029	0.65
ENSRNOG00000014452	377.33	219	353.97	231.05	0.0339	0.65
ENSRNOG00000030715	856.33	513	817.83	534.05	0.0407	0.65
ENSRNOG00000016587	614	359.33	598.22	390.76	0.0397	0.65
ENSRNOG00000012655	81.33	46.33	75.18	49.12	0.028	0.65
ENSRNOG00000007412	61.67	35.33	58.54	38.28	0.0403	0.65
ENSRNOG00000012367	564	334.67	520.19	340.35	0.0362	0.65
ENSRNOG00000012216	453.33	256.33	417.32	273.06	0.0248	0.65
ENSRNOG00000033694	150	86.67	143.46	93.88	0.0307	0.65
ENSRNOG00000013889	187.33	106	173.98	113.86	0.039	0.65
ENSRNOG00000015894	191	112	180.34	118.02	0.0308	0.65
ENSRNOG00000049937	42.67	25.33	40.16	26.29	0.0459	0.65
ENSRNOG00000025052	96.33	54	90.45	59.21	0.0309	0.65
ENSRNOG00000033110	103	65	105.02	68.77	0.0487	0.65
ENSRNOG00000051458	68	37.67	62.17	40.71	0.0354	0.65
ENSRNOG00000061484	821.67	470.67	781.36	511.71	0.0216	0.65
ENSRNOG00000028640	113.33	63	107.36	70.32	0.0331	0.65
ENSRNOG00000007300	102	59.67	101.29	66.36	0.0495	0.66
ENSRNOG00000015476	21.67	13	21.23	13.91	0.049	0.66
ENSRNOG00000024272	152	87.67	142.17	93.15	0.0362	0.66
ENSRNOG00000008283	320	183	299.03	195.98	0.031	0.66
ENSRNOG00000027869	29.67	17.33	28.6	18.75	0.0487	0.66
ENSRNOG00000006025	103.33	60	98.29	64.43	0.0361	0.66
ENSRNOG00000009563	198	105	173.8	113.94	0.0288	0.66
ENSRNOG00000017673	38	21.33	35.66	23.38	0.0331	0.66
ENSRNOG00000033434	104	58	95.57	62.66	0.0423	0.66
ENSRNOG00000017416	241.33	139.33	227.03	148.87	0.0362	0.66
ENSRNOG00000005342	90.67	49.33	81.57	53.5	0.0361	0.66
ENSRNOG00000004444	62	33.67	57.6	37.79	0.0432	0.66
ENSRNOG00000015426	43	26	41.68	27.38	0.0498	0.66
ENSRNOG00000061299	9084	5258	8605.83	5654.48	0.0362	0.66
ENSRNOG00000028627	364.67	201.33	342.14	224.82	0.04	0.66
ENSRNOG00000020342	30.67	17.33	28.37	18.65	0.0425	0.66
ENSRNOG00000018669	178.33	102	169.12	111.17	0.0364	0.66
ENSRNOG00000003365	683	379	638.72	419.92	0.0322	0.66
ENSRNOG00000053502	761.67	439	703.36	462.59	0.0364	0.66
ENSRNOG00000021220	161.67	94	156.64	103.11	0.0428	0.66
ENSRNOG00000003172	1076.33	635.67	1025.37	675.41	0.0331	0.66
ENSRNOG00000005971	43.33	25	39.73	26.17	0.0436	0.66
ENSRNOG00000025970	33	19.33	31	20.42	0.0439	0.66
ENSRNOG00000007728	150.67	86.67	143.41	94.51	0.0309	0.66
ENSRNOG00000012640	646	366.67	607.94	400.77	0.0267	0.66
ENSRNOG00000016620	40.67	23.67	39.31	25.92	0.0463	0.66
ENSRNOG00000042404	23	14	22.1	14.58	0.0488	0.66
ENSRNOG00000020374	47.67	27.67	44.96	29.68	0.0347	0.66
ENSRNOG00000009446	735	424.33	682.04	450.46	0.0345	0.66
ENSRNOG00000021840	645	369.67	595.68	393.56	0.0445	0.66
ENSRNOG00000007837	212.33	121.67	192.08	126.9	0.0302	0.66
ENSRNOG00000017086	41.33	23.67	37.75	24.95	0.0427	0.66
ENSRNOG00000021525	311.33	185.33	294.99	194.97	0.0362	0.66
ENSRNOG00000001158	252.33	144.33	233.27	154.2	0.0337	0.66
ENSRNOG00000001338	195.67	101.67	169.44	112.03	0.046	0.66
ENSRNOG00000014776	221.33	128.33	206.57	136.62	0.032	0.66
ENSRNOG00000037951	81	46.33	75.88	50.19	0.0286	0.66
ENSRNOG00000002358	1147.33	649	1064.41	704.47	0.0408	0.66
ENSRNOG00000009849	54	30.67	49.84	32.99	0.0329	0.66
ENSRNOG00000019080	198.67	114.67	190.23	125.92	0.0286	0.66
ENSRNOG00000028668	1466	772.67	1297.69	859.1	0.0298	0.66
ENSRNOG00000022686	491	279.67	459.33	304.29	0.0316	0.66
ENSRNOG00000018659	511	284.67	468.41	310.45	0.0289	0.66
ENSRNOG00000011977	424	247.67	393.59	260.87	0.0324	0.66
ENSRNOG00000013987	551.67	316.67	516.62	342.63	0.0262	0.66
ENSRNOG00000046848	315.67	176.67	286.88	190.3	0.0262	0.66
ENSRNOG00000006359	84.33	48.33	80.6	53.47	0.0429	0.66
ENSRNOG00000007654	102	55.67	92.87	61.62	0.0285	0.66
ENSRNOG00000001729	94	53	85.65	56.83	0.0353	0.66
ENSRNOG00000054296	33	18.33	31.05	20.61	0.046	0.66
ENSRNOG00000010065	94.67	54	90.34	59.96	0.0454	0.66
ENSRNOG00000018689	135.67	80.33	130.31	86.5	0.0338	0.66
ENSRNOG00000001795	877.33	523.33	833.37	553.33	0.027	0.66
ENSRNOG00000007514	521.33	314.33	498.29	330.89	0.0396	0.66
ENSRNOG00000021183	38.33	20	33.69	22.37	0.0487	0.66
ENSRNOG00000019779	57.33	33	53.46	35.52	0.0432	0.66
ENSRNOG00000059008	141.33	83.33	132.05	87.76	0.0304	0.66
ENSRNOG00000019129	27.67	15.33	24.25	16.12	0.0497	0.66
ENSRNOG00000030183	524	307	491.94	327.19	0.0302	0.67
ENSRNOG00000013634	239	135.67	223.93	149.07	0.0366	0.67
ENSRNOG00000006526	695	413	655.84	436.79	0.0261	0.67
ENSRNOG00000020246	890.33	529.33	872.03	581.03	0.0396	0.67
ENSRNOG00000008529	114	64.33	106.05	70.67	0.032	0.67
ENSRNOG00000008736	40	21.67	35.41	23.6	0.0499	0.67
ENSRNOG00000015845	1032.33	598	990.89	660.59	0.0265	0.67
